# Supplementary material for: Regulation of Toll-like Receptor Signaling by the SF3a mRNA Splicing Complex
Source: PubMed Central journal article supplement (PMC4450051; doi:10.1371/journal.pgen.1004932), 2015-02-06

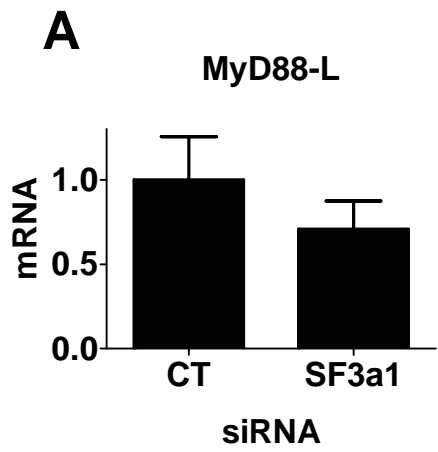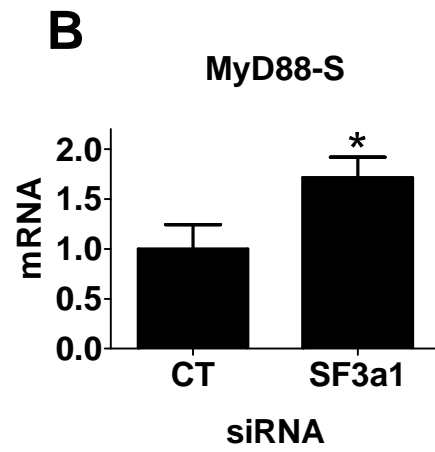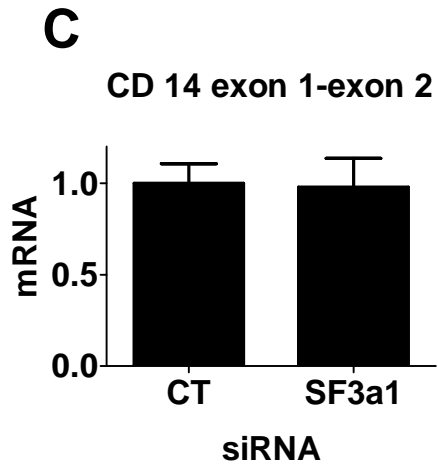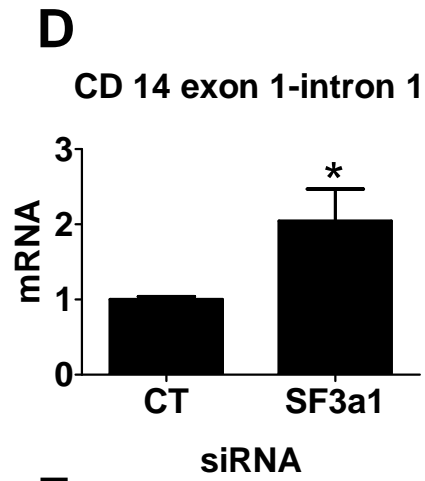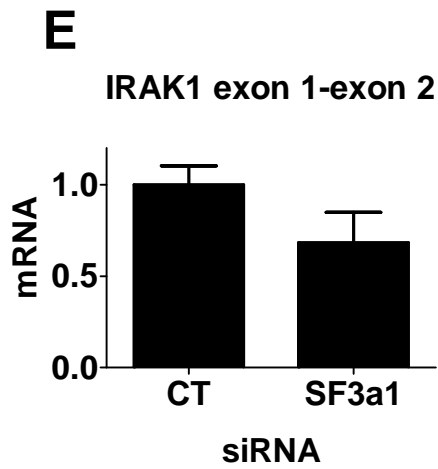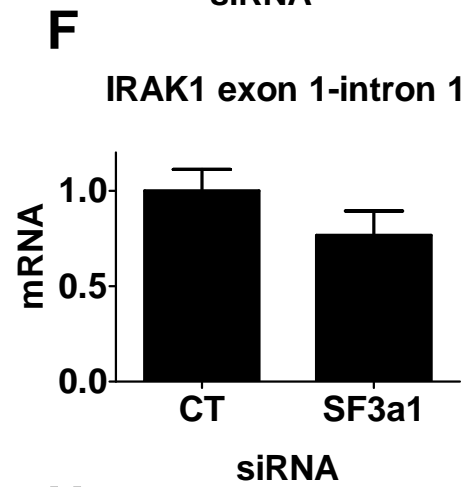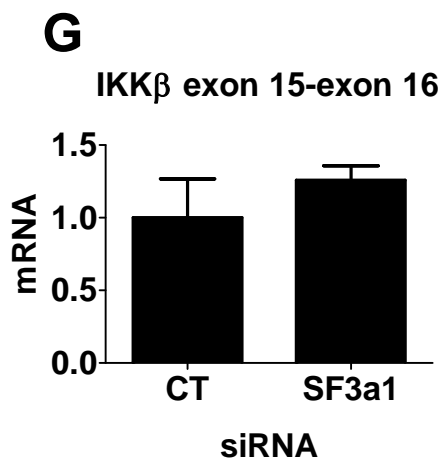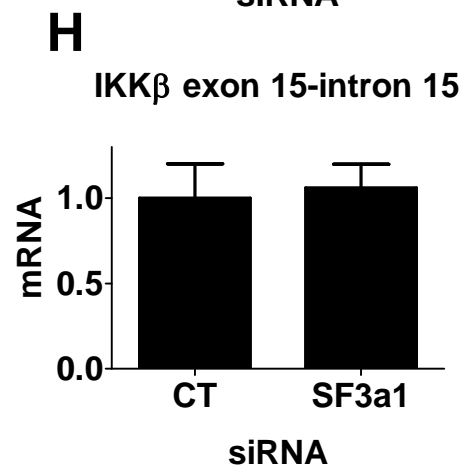

Supplement: pgen.1004932.s002.pdf [file pgen.1004932.s002.pdf]
