# Supplementary material for: Regulation of Toll-like Receptor Signaling by the SF3a mRNA Splicing Complex
Source: PLoS Genet. 2015 Feb 6;11(2):e1004932. doi: 10.1371/journal.pgen.1004932 (PMC4450051; doi:10.1371/journal.pgen.1004932)
Supplement: S8 Table — DESeq – CT siRNA with LPS vs SF3a1 siRNA with LPS. (XLSX) [file pgen.1004932.s010.xlsx]

## Sheet: DESeq_24_LPS-vs-SF3_LPS_FDR0.1
Table S8. DESeq, CT siRNA with LPS vs SF3A1 siRNA with LPS
Significantly differentially expressed genes at FDR 0.1
Ensembl ID	log2FoldChange	pval	padj	Gene	Description
ENSMUSG00000004655	Inf	1.66008e-05	0.000669676	Aqp1	AQUAPORIN AQP AQUAPORIN WATER CHANNEL WATER CHANNEL
ENSMUSG00000020325	Inf	0.0083093	0.0871164	Fstl3	FOLLISTATIN RELATED 3 PRECURSOR FOLLISTATIN 3 FOLLISTATIN RELATED GENE
ENSMUSG00000029641	Inf	1.43427e-08	1.71725e-06	Rasl11a	RAS FAMILY MEMBER
ENSMUSG00000069581	Inf	0.00914117	0.0934102	Tspear	THROMBOSPONDIN TYPE LAMININ G DOMAIN AND EAR REPEAT CONTAINING PRECURSOR TSP EAR
ENSMUSG00000092659	Inf	6.413e-09	8.89711e-07	Mir3100
ENSMUSG00000074004	6.94849	7.88328e-09	1.04928e-06	B3gnt6	UDP GLCNAC:BETAGAL BETA 1 3 N ACETYLGLUCOSAMINYLTRANSFERASE BGNT BETA 1 3 GN BETA 1 3 N ACETYLGLUCOSAMINYLTRANSFERASE BETA3GN EC_2.4.1.-
ENSMUSG00000073018	6.5878	3.34072e-07	2.59163e-05	Gm1070	PROTEINPROTEIN
ENSMUSG00000001300	6.3123	5.16653e-15	3.22552e-12	Efnb2	EPHRIN B1 PRECURSOR ELK LIGAND ELK L EPH RELATED RECEPTOR TYROSINE KINASE LIGAND 2 LERK 2
ENSMUSG00000040891	6.27762	0.00781839	0.0834375	Foxa3	HEPATOCYTE NUCLEAR FACTOR 3 HNF 3 HNF FORKHEAD BOX
ENSMUSG00000042828	5.69694	4.1276e-09	6.33008e-07	Trim72	TRIPARTITE MOTIF CONTAINING 72 MITSUGUMIN 53 MG53
ENSMUSG00000031698	5.61614	0.00142105	0.0233912	Mylk3	MYOSIN LIGHT CHAIN KINASE EC_2.7.11.18
ENSMUSG00000048458	5.60665	4.36692e-13	1.81754e-10	Fam212b	UNKNOWN
ENSMUSG00000026817	5.58487	1.51502e-19	2.20696e-16	Ak1	ADENYLATE KINASE ISOENZYME 1 AK 1 EC_2.7.4.3 ATP AMP TRANSPHOSPHORYLASE 1 ATP:AMP PHOSPHOTRANSFERASE ADENYLATE MONOPHOSPHATE KINASE MYOKINASE
ENSMUSG00000041801	5.57225	2.87463e-30	3.76878e-26	Phlda3	PLECKSTRIN HOMOLOGY DOMAIN FAMILY A MEMBER 3 TDAG51/IPL HOMOLOG 1
ENSMUSG00000065362	5.44215	1.14535e-15	7.50807e-13	Gm24411
ENSMUSG00000035498	5.22287	4.25031e-07	3.17514e-05	Cdcp1	CUB DOMAIN CONTAINING 1 PRECURSOR MEMBRANE GLYCOPROTEIN GP140 TRANSMEMBRANE AND ASSOCIATED WITH SRC KINASES CD318 ANTIGEN
ENSMUSG00000079620	5.09568	0.00945107	0.095756	Muc4	MUCIN 4 PRECURSOR MUC 4 ASCITES SIALOGLYCOPROTEIN ASGP PANCREATIC ADENOCARCINOMA MUCIN TESTIS MUCIN [CONTAINS MUCIN 4 ALPHA CHAIN ASCITES SIALOGLYCOPROTEIN 1 ASGP 1 ; MUCIN 4 BETA CHAIN ASCITES SIALOGLYCOPROTEIN 2 ASGP 2 ]
ENSMUSG00000036655	5.08788	4.94473e-07	3.59492e-05	Colec11	COLLECTIN PRECURSOR COLLECTIN 1 CL
ENSMUSG00000031070	4.92512	0.000141722	0.00380748	Mrgprf	MAS RELATED G COUPLED RECEPTOR MEMBER F MAS RELATED GENE F G COUPLED RECEPTOR
ENSMUSG00000020388	4.92381	0.000280216	0.00656928	Pdlim4	PDZ AND LIM DOMAIN
ENSMUSG00000004371	4.88579	7.20442e-08	6.91968e-06	Il11	INTERLEUKIN 11 PRECURSOR IL 11
ENSMUSG00000088632	4.83205	1.55237e-08	1.84184e-06	Gm22314
ENSMUSG00000022758	4.81433	0.00124116	0.0211878	P2rx6	P2X PURINOCEPTOR ATP RECEPTOR PURINERGIC RECEPTOR
ENSMUSG00000006445	4.78412	1.25214e-17	1.05911e-14	Epha2	EPHRIN TYPE A RECEPTOR PRECURSOR EC_2.7.10.1 KINASE
ENSMUSG00000034457	4.75198	3.88058e-07	2.94901e-05	Eda2r	TUMOR NECROSIS FACTOR RECEPTOR SUPERFAMILY MEMBER 27 X LINKED ECTODYSPLASIN A2 RECEPTOR EDA A2 RECEPTOR
ENSMUSG00000037211	4.70132	0.00545379	0.0640429	Spry1	SPROUTY HOMOLOG SPRY
ENSMUSG00000023411	4.63838	0.0058757	0.0674843	Nfatc4	NUCLEAR FACTOR OF ACTIVATED T CELLS CYTOPLASMIC 1 NF ATC1 NFATC1 NFAT TRANSCRIPTION COMPLEX CYTOSOLIC COMPONENT NF ATC NFATC
ENSMUSG00000027955	4.6231	5.09624e-32	1.33629e-27	Fam198b	FAM198B EXPRESSED IN NERVE AND EPITHELIUM DURING DEVELOPMENT
ENSMUSG00000028211	4.47037	3.25119e-21	7.10411e-18	Trp53inp1	TUMOR P53 INDUCIBLE NUCLEAR 1 STRESS INDUCED THYMUS EXPRESSED ACIDIC TEAP P53 DEPENDENT DAMAGE INDUCIBLE NUCLEAR 1 P53DINP1
ENSMUSG00000039960	4.44419	8.07692e-15	4.81329e-12	Rhou	RHO RELATED GTP BINDING RHO GTPASE WNT 1 RESPONSIVE CDC42 HOMOLOG WRCH
ENSMUSG00000021057	4.41052	4.21501e-08	4.33419e-06	Akap5	A KINASE ANCHOR 5 AKAP 5 A KINASE ANCHOR KDA AKAP CAMP DEPENDENT KINASE REGULATORY SUBUNIT II HIGH AFFINITY BINDING
ENSMUSG00000040855	4.39071	6.84666e-05	0.00213722	Reps2	RALBP1 ASSOCIATED EPS DOMAIN CONTAINING 2 PARTNER OF RALBP1 RALBP1 INTERACTING 2
ENSMUSG00000027896	4.33953	3.3645e-07	2.60238e-05	Slc16a4	MONOCARBOXYLATE TRANSPORTER 5 MCT 5
ENSMUSG00000000817	4.29856	0.00134188	0.0225258	Fasl	TUMOR NECROSIS FACTOR LIGAND SUPERFAMILY MEMBER 6 CD95 LIGAND CD95 L FAS ANTIGEN LIGAND FAS LIGAND FASL CD178 ANTIGEN [CONTAINS TUMOR NECROSIS FACTOR LIGAND SUPERFAMILY MEMBER 6 MEMBRANE FORM; TUMOR NECROSIS FACTOR LIGAND SUPERFAMILY MEMBER 6 SOLUBLE FORM
ENSMUSG00000029094	4.23814	4.94595e-07	3.59492e-05	Afap1	ACTIN FILAMENT ASSOCIATED 1 1 AFAP1 1
ENSMUSG00000058743	4.09841	8.6632e-05	0.00256676	Kcnj14	INWARD RECTIFIER POTASSIUM CHANNEL INWARD RECTIFIER K + CHANNEL KIR2 IRK POTASSIUM CHANNEL INWARDLY RECTIFYING SUBFAMILY J MEMBER
ENSMUSG00000054863	4.0934	0.00156513	0.0252263	Fam19a5	FA CHEMOKINE TAFA 5
ENSMUSG00000026589	4.08967	1.05773e-06	6.74809e-05	Sec16b	TRANSPORT SEC16B LEUCINE ZIPPER TRANSCRIPTION REGULATOR 2 REGUCALCIN GENE PROMOTER REGION RELATED P117 RGPR P117 SEC16 HOMOLOG B
ENSMUSG00000027954	4.07148	5.54451e-09	7.81626e-07	Efna1	EPHRIN A1 PRECURSOR EPH RELATED RECEPTOR TYROSINE KINASE LIGAND 1 LERK 1 IMMEDIATE EARLY RESPONSE B61 [CONTAINS EPHRIN A1 SECRETED FORM]
ENSMUSG00000031785	4.01342	0.000638571	0.0125895	Gpr56	G COUPLED RECEPTOR PRECURSOR
ENSMUSG00000031383	4.00652	4.91757e-06	0.000248926	Dusp9	DUAL SPECIFICITY PHOSPHATASE EC_3.1.3.16 EC_3.1.3.- 48 MITOGEN ACTIVATED KINASE PHOSPHATASE 3 MAP KINASE PHOSPHATASE 3 MKP 3
ENSMUSG00000043631	4.00137	0.00434843	0.0543213	Ecm2	EXTRACELLULAR MATRIX 2 PRECURSOR
ENSMUSG00000070498	3.90483	0.000778983	0.014785	Tmem132b	TRANSMEMBRANE PRECURSOR
ENSMUSG00000078776	3.89392	1.0446e-09	1.889e-07	9530053A07Rik	PRECURSOR
ENSMUSG00000022505	3.88555	0.000144898	0.0038769	Emp2	EPITHELIAL MEMBRANE 2 EMP 2
ENSMUSG00000055675	3.85037	1.87737e-19	2.46132e-16	Kbtbd11	KELCH DOMAIN CONTAINING
ENSMUSG00000086331	3.84853	1.45266e-13	6.68251e-11	Gm16310
ENSMUSG00000022997	3.84243	4.41842e-09	6.68177e-07	Wnt1	WNT
ENSMUSG00000074743	3.84026	0.000781476	0.0148148	Thbd	THROMBOMODULIN TM CD141 ANTIGEN
ENSMUSG00000073130	3.82876	9.54113e-16	6.58363e-13	Gm1141	AMBIGUOUS
ENSMUSG00000019853	3.78665	1.38301e-15	8.84488e-13	Hebp2	HEME BINDING 2 SOUL
ENSMUSG00000039238	3.77652	0.00543854	0.063948	Zfp750	ZINC FINGER 750
ENSMUSG00000038264	3.77377	8.74623e-05	0.00258843	Sema7a	SEMAPHORIN 7A PRECURSOR SEMAPHORIN K1 SEMA K1 SEMAPHORIN L SEMA L CD108 ANTIGEN
ENSMUSG00000032128	3.75322	1.89881e-06	0.0001129	Robo3	ROUNDABOUT HOMOLOG PRECURSOR
ENSMUSG00000045382	3.74992	4.84606e-05	0.00162908	Cxcr4	C X C CHEMOKINE RECEPTOR TYPE 4 CXC R4 CXCR 4 FUSIN LEUKOCYTE DERIVED SEVEN TRANSMEMBRANE DOMAIN RECEPTOR LESTR STROMAL CELL DERIVED FACTOR 1 RECEPTOR SDF 1 RECEPTOR CD184 ANTIGEN
ENSMUSG00000049112	3.74906	0.0010746	0.018949	Oxtr	RECEPTOR
ENSMUSG00000024168	3.6883	5.01153e-07	3.62004e-05	Tmem204	TRANSMEMBRANE 204 CLAUDIN 24
ENSMUSG00000050390	3.68218	1.44162e-23	6.10389e-20	C77080	UNCHARACTERIZED
ENSMUSG00000084862	3.60493	0.00783314	0.0835269	Gm16278
ENSMUSG00000032470	3.58679	4.04375e-20	6.74032e-17	Mras	RAS PRECURSOR
ENSMUSG00000089630	3.58536	0.00125168	0.0213257	Gm6903
ENSMUSG00000044716	3.57542	0.00105126	0.0186977	Dok7	DOK 7 DOWNSTREAM OF TYROSINE KINASE 7
ENSMUSG00000031297	3.55363	0.00548899	0.064253	Slc7a3	LOW AFFINITY CATIONIC AMINO ACID TRANSPORTER 2 CAT 2 CAT2 SOLUTE CARRIER FAMILY 7 MEMBER 2
ENSMUSG00000018543	3.53829	1.08075e-14	6.29744e-12	1700001P01Rik	UNCHARACTERIZED HOMOLOG
ENSMUSG00000064267	3.52579	5.47867e-07	3.92503e-05	Hvcn1	VOLTAGE GATED HYDROGEN CHANNEL 1 HYDROGEN VOLTAGE GATED CHANNEL 1 HV1
ENSMUSG00000028150	3.50754	2.9358e-06	0.000162026	Rorc	NUCLEAR RECEPTOR ROR NUCLEAR RECEPTOR RZR NUCLEAR RECEPTOR SUBFAMILY 1 GROUP F MEMBER RETINOID RELATED ORPHAN RECEPTOR
ENSMUSG00000042842	3.504	1.24623e-17	1.05911e-14	Serpinb6b	SERPIN
ENSMUSG00000025407	3.49665	2.01487e-05	0.000787362	Gli1	ZINC FINGER
ENSMUSG00000033368	3.46609	2.15174e-08	2.44246e-06	Trim69	TRIPARTITE MOTIF CONTAINING
ENSMUSG00000053461	3.4358	0.00296646	0.0405968	Hhipl2	PRECURSOR
ENSMUSG00000030600	3.41772	0.00235237	0.0346136	Lrfn1	LEUCINE RICH REPEAT AND FIBRONECTIN TYPE III DOMAIN CONTAINING PRECURSOR SYNAPTIC ADHESION MOLECULE
ENSMUSG00000037855	3.41082	4.48231e-09	6.68291e-07	Zfp365	UNKNOWN
ENSMUSG00000041845	3.40942	0.000217111	0.0053354	Rhod	GTP BINDING PRECURSOR
ENSMUSG00000046668	3.39343	6.885e-14	3.40626e-11	Cxxc5	CXXC TYPE ZINC FINGER 5
ENSMUSG00000048398	3.36668	0.00255544	0.0367559	Gm5065	GALECTIN RELATED LECTIN GALACTOSIDE BINDING
ENSMUSG00000052675	3.34484	5.62589e-05	0.0018167	Zfp112	ZINC FINGER
ENSMUSG00000086236	3.31944	0.00820033	0.0862845	5830418P13Rik
ENSMUSG00000065287	3.31692	0.00305482	0.0415674	Gm24451
ENSMUSG00000017491	3.31674	2.77692e-20	5.60105e-17	Rarb	RETINOIC ACID RECEPTOR RAR NUCLEAR RECEPTOR SUBFAMILY 1 GROUP B MEMBER
ENSMUSG00000043903	3.31581	0.00253191	0.0364976	Gm22	ZINC FINGER 469
ENSMUSG00000062098	3.31105	4.28929e-06	0.000224043	Btbd3	BTB/POZ DOMAIN CONTAINING
ENSMUSG00000044429	3.26547	5.00333e-07	3.62004e-05	Cryga	GAMMA CRYSTALLIN GAMMA CRYSTALLIN
ENSMUSG00000074676	3.2462	0.00248764	0.0360976	Foxs1	FORKHEAD BOX S1 FORKHEAD 18 FORKHEAD RELATED TRANSCRIPTION FACTOR 10 FREAC 10
ENSMUSG00000088219	3.24347	3.10183e-05	0.0011265	Gm22077
ENSMUSG00000047904	3.24115	0.00340327	0.0451377	Sstr2	SOMATOSTATIN RECEPTOR TYPE SS R R
ENSMUSG00000071112	3.23343	1.06286e-07	9.57705e-06	B230216G23Rik	UNKNOWN
ENSMUSG00000031451	3.21799	0.00193583	0.029841	Gas6	VITAMIN K DEPENDENT S PRECURSOR
ENSMUSG00000064336	3.21366	0.00389143	0.0499948	mt-Tf
ENSMUSG00000064514	3.20561	0.000180769	0.00461532	Gm22455
ENSMUSG00000051054	3.19687	0.000522244	0.0108508	1700014D04Rik	AMBIGUOUS
ENSMUSG00000028238	3.18383	0.0055309	0.0645994	Atp6v0d2	V TYPE PROTON ATPASE SUBUNIT D V ATPASE SUBUNIT D V ATPASE KDA SUBUNIT VACUOLAR PROTON PUMP SUBUNIT D
ENSMUSG00000026489	3.17174	1.62912e-11	4.64317e-09	Adck3	CHAPERONE ACTIVITY OF BC1 COMPLEX MITOCHONDRIAL PRECURSOR CHAPERONE ABC1 EC_2.7.11.- AARF DOMAIN CONTAINING KINASE 3
ENSMUSG00000037003	3.13659	0.00346793	0.0457868	Tenc1	TENSIN
ENSMUSG00000097227	3.10664	0.00385708	0.0496498	AC137678.1
ENSMUSG00000055497	3.09115	0.00193793	0.0298557	Gm9974
ENSMUSG00000010051	3.04766	5.8156e-10	1.12956e-07	Hyal1	HYALURONIDASE PRECURSOR EC_3.2.1.35 HYALURONOGLUCOSAMINIDASE
ENSMUSG00000050777	3.04693	0.000726139	0.0139386	Tmem37	VOLTAGE DEPENDENT CALCIUM CHANNEL GAMMA SUBUNIT NEURONAL VOLTAGE GATED CALCIUM CHANNEL GAMMA SUBUNIT TRANSMEMBRANE 37
ENSMUSG00000032666	3.04296	1.15278e-14	6.57111e-12	1700025G04Rik	UNCHARACTERIZED
ENSMUSG00000056214	3.0197	3.26059e-05	0.00117278	Pard6g	PARTITIONING DEFECTIVE 6 HOMOLOG PAR 6
ENSMUSG00000031750	3.01841	0.000563894	0.0114684	Il34	INTERLEUKIN 34 PRECURSOR IL 34
ENSMUSG00000097497	3.01657	4.94933e-07	3.59492e-05	RP23-247H23.2
ENSMUSG00000065041	3.01084	1.02322e-17	9.25165e-15	Gm24044
ENSMUSG00000032420	3.00695	0.00365783	0.047765	Nt5e	5' NUCLEOTIDASE PRECURSOR 5' NT EC_3.1.3.5 ECTO 5' NUCLEOTIDASE
ENSMUSG00000032021	3.00614	1.64479e-08	1.934e-06	Crtam	CYTOTOXIC AND REGULATORY T CELL MOLECULE PRECURSOR CLASS I MHC RESTRICTED T CELL ASSOCIATED MOLECULE CD355 ANTIGEN
ENSMUSG00000040918	2.99332	2.35438e-19	2.93972e-16	Slc19a2	TRANSPORTER 1 SOLUTE CARRIER FAMILY 19 MEMBER 1
ENSMUSG00000025504	2.97449	3.33931e-08	3.51647e-06	Eps8l2	EPIDERMAL GROWTH FACTOR RECEPTOR KINASE SUBSTRATE 8 EPS8 EPIDERMAL GROWTH FACTOR RECEPTOR PATHWAY SUBSTRATE 8 RELATED EPS8 RELATED
ENSMUSG00000001870	2.95732	0.00402146	0.0512374	Ltbp1	LATENT TRANSFORMING GROWTH FACTOR BETA BINDING PRECURSOR LTBP
ENSMUSG00000029101	2.94448	1.09325e-06	6.90748e-05	Rgs12	REGULATOR OF G SIGNALING
ENSMUSG00000030257	2.93819	7.82049e-07	5.20459e-05	Srgap3	SLIT ROBO RHO GTPASE ACTIVATING RHO GTPASE ACTIVATING
ENSMUSG00000041132	2.90982	4.93116e-18	5.172e-15	N4bp2l1	NEDD4 BINDING 2 1
ENSMUSG00000038967	2.88762	4.20331e-10	8.5438e-08	Pdk2	[PYRUVATE DEHYDROGENASE [LIPOAMIDE]] KINASE ISOZYME MITOCHONDRIAL PRECURSOR EC_2.7.11.2 PYRUVATE DEHYDROGENASE KINASE
ENSMUSG00000027983	2.88407	7.4248e-05	0.00226642	Cyp2u1	CYTOCHROME P450
ENSMUSG00000031465	2.87657	5.47336e-11	1.43517e-08	Angpt2	ANGIOPOIETIN PRECURSOR
ENSMUSG00000040653	2.87467	0.00592075	0.0677438	Ppp1r14c	PHOSPHATASE 1 REGULATORY SUBUNIT 14C KINASE ENHANCED PP1 INHIBITOR PKC POTENTIATED PP1 INHIBITORY
ENSMUSG00000042734	2.87449	8.01014e-05	0.00241696	Ttc9	TETRATRICOPEPTIDE REPEAT TPR REPEAT
ENSMUSG00000022790	2.8723	4.91169e-12	1.61091e-09	Igsf11	IMMUNOGLOBULIN SUPERFAMILY MEMBER 11 PRECURSOR IGSF11 BRAIN AND TESTIS SPECIFIC IMMUNOGLOBULIN SUPERFAMILY BT IGSF
ENSMUSG00000042485	2.85929	4.31342e-14	2.30821e-11	Mustn1	MUSCULOSKELETAL EMBRYONIC NUCLEAR 1
ENSMUSG00000021062	2.85367	6.14016e-06	0.000297599	Rab15	RAS RELATED RAB
ENSMUSG00000016526	2.85031	3.29825e-18	3.60348e-15	Dyrk3	DUAL SPECIFICITY TYROSINE PHOSPHORYLATION REGULATED KINASE EC_2.7.12.1
ENSMUSG00000031538	2.84592	0.00298993	0.0408754	Plat	TISSUE TYPE PLASMINOGEN ACTIVATOR PRECURSOR T PA T PLASMINOGEN ACTIVATOR TPA EC_3.4.21.68 [CONTAINS TISSUE TYPE PLASMINOGEN ACTIVATOR CHAIN A; TISSUE TYPE PLASMINOGEN ACTIVATOR CHAIN B]
ENSMUSG00000089774	2.84076	3.21524e-09	5.1095e-07	Slc5a3	COTRANSPORTER NA + COTRANSPORTER SOLUTE CARRIER FAMILY 5 MEMBER
ENSMUSG00000022756	2.8382	4.72232e-11	1.27654e-08	Slc7a4	LOW AFFINITY CATIONIC AMINO ACID TRANSPORTER 2 CAT 2 CAT2 SOLUTE CARRIER FAMILY 7 MEMBER 2
ENSMUSG00000032014	2.82036	0.00546248	0.0640571	Oaf	OUT AT FIRST
ENSMUSG00000042510	2.81894	6.74528e-11	1.70065e-08	AA986860	SPECIFICALLY ANDROGEN REGULATED GENE
ENSMUSG00000035179	2.81427	1.49588e-05	0.000612867	Ppp1r32	PHOSPHATASE 1 REGULATORY SUBUNIT 32
ENSMUSG00000038776	2.81401	1.86508e-16	1.39726e-13	Ephx1	EPOXIDE HYDROLASE 1 EC_3.3.2.9 EPOXIDE HYDRATASE MICROSOMAL EPOXIDE HYDROLASE
ENSMUSG00000027663	2.81133	6.98917e-18	6.5451e-15	Zmat3	ZINC FINGER MATRIN TYPE 3 ZINC FINGER WIG 1 P53 ACTIVATED GENE 608
ENSMUSG00000095472	2.8111	0.000101345	0.00292985	Snord88a
ENSMUSG00000030895	2.81039	0.00138104	0.0230303	Hpx	HEMOPEXIN PRECURSOR
ENSMUSG00000049580	2.79929	2.45188e-10	5.35027e-08	Tsku	TSUKUSHIN PRECURSOR TSUKUSHI LEUCINE RICH REPEAT CONTAINING 54
ENSMUSG00000021822	2.78286	5.82484e-20	8.98431e-17	Plau	UROKINASE TYPE PLASMINOGEN ACTIVATOR PRECURSOR U PLASMINOGEN ACTIVATOR UPA EC_3.4.21.73 [CONTAINS UROKINASE TYPE PLASMINOGEN ACTIVATOR LONG CHAIN A; UROKINASE TYPE PLASMINOGEN ACTIVATOR SHORT CHAIN A; UROKINASE TYPE PLASMINOGEN ACTIVATOR CHAIN B]
ENSMUSG00000026479	2.75229	8.66501e-13	3.34125e-10	Lamc2	LAMININ SUBUNIT GAMMA 2 PRECURSOR EPILIGRIN SUBUNIT GAMMA KALININ SUBUNIT GAMMA KALININ/NICEIN/EPILIGRIN 100 KDA SUBUNIT LAMININ B2T CHAIN LAMININ 5 SUBUNIT GAMMA NICEIN SUBUNIT GAMMA
ENSMUSG00000050150	2.6721	0.000388098	0.00853002	Slc9b1	MITOCHONDRIAL SODIUM/HYDROGEN EXCHANGER 9B2 MITOCHONDRIAL NA + /H + EXCHANGER NHA2 NA + /H + EXCHANGER DOMAIN CONTAINING 2 NHE DOMAIN CONTAINING 2 SODIUM/HYDROGEN EXCHANGER DOMAIN CONTAINING 2 SOLUTE CARRIER FAMILY 9 SUBFAMILY B MEMBER 2
ENSMUSG00000002504	2.66594	2.35578e-10	5.2566e-08	Slc9a3r2	NA + /H + EXCHANGE REGULATORY COFACTOR NHE RF1 NHERF 1 EZRIN RADIXIN MOESIN BINDING PHOSPHOPROTEIN 50 EBP50 REGULATORY COFACTOR OF NA + /H + EXCHANGER SODIUM HYDROGEN EXCHANGER REGULATORY FACTOR 1 SOLUTE CARRIER FAMILY 9 A3 REGULATORY FACTOR 1
ENSMUSG00000002732	2.64119	1.40803e-06	8.64635e-05	Fkbp7	PEPTIDYL PROLYL CIS TRANS ISOMERASE PRECURSOR PPIASE EC_5.2.1.8 KDA FK506 BINDING KDA FKBP FKBP FK506 BINDING FKBP ROTAMASE
ENSMUSG00000027171	2.61234	2.68353e-10	5.76761e-08	Prrg4	TRANSMEMBRANE GAMMA CARBOXYGLUTAMIC ACID 4 PRECURSOR PROLINE RICH GAMMA CARBOXYGLUTAMIC ACID 4 PROLINE RICH GLA 4
ENSMUSG00000018849	2.60578	2.70763e-06	0.000152027	Wwc1	WW DOMAIN CONTAINING
ENSMUSG00000089571	2.59885	0.00176786	0.0277409	Gm23008
ENSMUSG00000072647	2.58265	8.61346e-05	0.00256034	Adam1a	DISINTEGRIN AND METALLOPROTEINASE DOMAIN CONTAINING PRECURSOR ADAM
ENSMUSG00000022389	2.57858	7.75367e-13	3.03446e-10	Tef	THYROTROPH EMBRYONIC FACTOR
ENSMUSG00000083567	2.57706	0.000166554	0.00434982	Gm11451
ENSMUSG00000037349	2.57644	2.76626e-08	2.99728e-06	Nudt22	NUCLEOSIDE DIPHOSPHATE LINKED MOIETY X MOTIF 22 NUDIX MOTIF 22
ENSMUSG00000080610	2.57441	0.000702103	0.0135566	Snord110
ENSMUSG00000059213	2.57087	0.00028475	0.00664165	Ddn	DENDRIN
ENSMUSG00000041120	2.56858	0.00256263	0.0367817	Nbl1	NEUROBLASTOMA SUPPRESSOR OF TUMORIGENICITY 1 PRECURSOR
ENSMUSG00000001240	2.55744	1.67977e-05	0.000675541	Ramp2	RECEPTOR ACTIVITY MODIFYING 2 PRECURSOR
ENSMUSG00000041324	2.54429	0.00178935	0.0279609	Inhba	INHIBIN BETA CHAIN PRECURSOR ACTIVIN BETA CHAIN
ENSMUSG00000078532	2.54369	2.63263e-09	4.23498e-07	Nkain1	SODIUM/POTASSIUM TRANSPORTING ATPASE SUBUNIT BETA 1 INTERACTING NA + /K + TRANSPORTING ATPASE SUBUNIT BETA 1 INTERACTING
ENSMUSG00000069206	2.54087	4.91487e-12	1.61091e-09	Zfp874a	ZINC FINGER
ENSMUSG00000032122	2.5381	2.42868e-13	1.06137e-10	Slc37a2	SUGAR PHOSPHATE EXCHANGER SOLUTE CARRIER FAMILY 37 MEMBER
ENSMUSG00000069248	2.52549	0.000227318	0.00551898	Serpinb6e	SERPIN
ENSMUSG00000074661	2.52175	0.0013233	0.0223031	Pde4d	UNKNOWN
ENSMUSG00000036186	2.51389	3.04018e-05	0.00111336	Fam69b	FAM69A
ENSMUSG00000079652	2.50934	0.00188882	0.0292538	Fam71f2	UNKNOWN
ENSMUSG00000064451	2.50357	1.9369e-06	0.000114904	Snora23
ENSMUSG00000029135	2.49243	0.000270865	0.00641586	Fosl2	FOS RELATED ANTIGEN 2 FRA 2
ENSMUSG00000027849	2.4798	0.00585103	0.0673373	Syt6	SYNAPTOTAGMIN SYNAPTOTAGMIN
ENSMUSG00000065200	2.47598	0.00116149	0.0201424	Gm24613
ENSMUSG00000038195	2.47147	1.22898e-06	7.61824e-05	Rilp	RAB INTERACTING LYSOSOMAL
ENSMUSG00000042073	2.46618	2.51184e-05	0.000943125	Abhd14b	ALPHA/BETA HYDROLASE DOMAIN CONTAINING 14B ABHYDROLASE DOMAIN CONTAINING 14B EC 3 CCG1 INTERACTING FACTOR B
ENSMUSG00000019558	2.45564	5.36532e-13	2.19819e-10	Slc6a8	SODIUM AND CHLORIDE DEPENDENT TRANSPORTER SOLUTE CARRIER FAMILY 6 MEMBER
ENSMUSG00000020334	2.45037	1.44851e-06	8.85348e-05	Slc22a4	SOLUTE CARRIER FAMILY 22 MEMBER ORGANIC CATION/CARNITINE TRANSPORTER
ENSMUSG00000004105	2.4483	4.25699e-05	0.00147435	Angptl2	ANGIOPOIETIN RELATED PRECURSOR ANGIOPOIETIN
ENSMUSG00000038332	2.44779	3.96927e-13	1.67868e-10	Sesn1	SESTRIN
ENSMUSG00000017386	2.43596	1.25417e-11	3.82392e-09	Traf4	TNF RECEPTOR ASSOCIATED FACTOR 4 CYSTEINE RICH ASSOCIATED RING AND TRAF DOMAINS 1
ENSMUSG00000039611	2.4093	2.93473e-07	2.31782e-05	Tmem246	TRANSMEMBRANE 246
ENSMUSG00000020654	2.40899	0.00257957	0.0369517	Adcy3	ADENYLATE CYCLASE TYPE EC_4.6.1.1 ATP PYROPHOSPHATE LYASE ADENYLATE CYCLASE TYPE ADENYLYL CYCLASE CA 2+ ADENYLYL CYCLASE
ENSMUSG00000043993	2.395	2.377e-05	0.000903293	2900052L18Rik
ENSMUSG00000089662	2.38775	0.00475052	0.0580158	Gm14057
ENSMUSG00000025207	2.38433	3.74229e-06	0.000199039	Sema4g	SEMAPHORIN PRECURSOR
ENSMUSG00000044244	2.38129	0.00200518	0.0306756	Il20rb	INTERLEUKIN 20 RECEPTOR SUBUNIT BETA PRECURSOR IL 20 RECEPTOR SUBUNIT BETA IL 20R BETA IL 20RB IL 20R2
ENSMUSG00000009654	2.37199	4.48792e-06	0.000231194	Oit3	ONCOPROTEIN INDUCED TRANSCRIPT 3 PRECURSOR LIVER SPECIFIC ZONA PELLUCIDA DOMAIN CONTAINING
ENSMUSG00000072809	2.37072	3.34887e-05	0.00119796	9330160F10Rik	AMBIGUOUS
ENSMUSG00000085733	2.36515	0.00305843	0.0415949	Gm11641
ENSMUSG00000074006	2.35241	5.1938e-07	3.74139e-05	Omp	OLFACTORY MARKER OLFACTORY NEURONAL SPECIFIC
ENSMUSG00000032012	2.34909	3.04628e-08	3.26026e-06	Pvrl1	POLIOVIRUS RECEPTOR RELATED 1 PRECURSOR HERPES VIRUS ENTRY MEDIATOR C HERPESVIRUS ENTRY MEDIATOR C HVEC NECTIN 1 CD111 ANTIGEN
ENSMUSG00000006356	2.3465	4.67869e-10	9.43691e-08	Crip2	CYSTEINE RICH 2 CRP 2
ENSMUSG00000023495	2.34552	0.00132141	0.0222965	Pcbp4	POLY RC BINDING ALPHA HETEROGENEOUS NUCLEAR RIBONUCLEOPROTEIN HNRNP
ENSMUSG00000020592	2.33574	1.44251e-10	3.37714e-08	Sdc1	SYNDECAN 1 PRECURSOR SYND1 CD138 ANTIGEN
ENSMUSG00000027435	2.32741	0.00437836	0.0545133	Cd93	COMPLEMENT COMPONENT C1Q RECEPTOR PRECURSOR C1Q/MBL/SPA RECEPTOR C1QR P C1QRP CELL SURFACE ANTIGEN AA4 COMPLEMENT COMPONENT 1 Q SUBCOMPONENT RECEPTOR 1 CD93 ANTIGEN
ENSMUSG00000040187	2.32715	0.0015325	0.0248969	Arntl2	ARYL HYDROCARBON RECEPTOR NUCLEAR TRANSLOCATOR 1 BRAIN AND MUSCLE ARNT 1
ENSMUSG00000000318	2.30653	1.05755e-07	9.56212e-06	Clec10a	ASIALOGLYCOPROTEIN RECEPTOR ASGP R ASGPR HEPATIC LECTIN HL
ENSMUSG00000072812	2.30395	0.000272709	0.00644789	Ahnak2	NEUROBLAST DIFFERENTIATION ASSOCIATED AHNAK DESMOYOKIN
ENSMUSG00000065669	2.30335	0.00093012	0.0169719	Gm22581
ENSMUSG00000026932	2.29931	2.20932e-06	0.000126763	Nacc2	NUCLEUS ACCUMBENS ASSOCIATED NAC BTB/POZ DOMAIN CONTAINING
ENSMUSG00000050821	2.28339	8.22449e-07	5.40487e-05	Fam131a	FAM131A PRECURSOR
ENSMUSG00000037410	2.27944	3.22125e-06	0.000174875	Tbc1d2b	TBC1 DOMAIN FAMILY MEMBER
ENSMUSG00000048521	2.27286	0.00257476	0.0369123	Cxcr6	C C CHEMOKINE RECEPTOR TYPE C C CKR CC CKR CCR
ENSMUSG00000024975	2.2608	4.7673e-07	3.50149e-05	Pdcd4	PROGRAMMED CELL DEATH 4
ENSMUSG00000032135	2.25973	0.000773847	0.0147679	Mcam	CELL SURFACE GLYCOPROTEIN MUC18 PRECURSOR MELANOMA CELL ADHESION MOLECULE MELANOMA ASSOCIATED ANTIGEN MUC18 CD146 ANTIGEN
ENSMUSG00000018217	2.25243	1.79345e-05	0.000714681	Pmp22	PERIPHERAL MYELIN 22 PMP 22
ENSMUSG00000029161	2.25031	0.00292832	0.0402218	Cgref1	CELL GROWTH REGULATOR WITH EF HAND DOMAIN 1 PRECURSOR CELL GROWTH REGULATORY GENE 11 HYDROPHOBESTIN
ENSMUSG00000050295	2.24373	2.81503e-05	0.00103962	Foxc1	FORKHEAD BOX
ENSMUSG00000000223	2.23921	0.00077738	0.014785	Drp2	DYSTROPHIN
ENSMUSG00000020101	2.23838	5.18201e-09	7.38465e-07	4632428N05Rik	PLATELET RECEPTOR GI24 PRECURSOR
ENSMUSG00000027848	2.22137	2.86026e-13	1.22949e-10	Olfml3	OLFACTOMEDIN PRECURSOR
ENSMUSG00000040433	2.21749	2.16102e-10	4.88484e-08	Zbtb38	ZINC FINGER AND BTB DOMAIN CONTAINING 38
ENSMUSG00000001761	2.21706	0.000692612	0.0134029	Smo	SMOOTHENED HOMOLOG PRECURSOR SMO
ENSMUSG00000044231	2.21519	2.24889e-05	0.00086689	Nhlrc1	E3 UBIQUITIN LIGASE NHLRC1 EC_6.3.2.- MALIN NHL REPEAT CONTAINING 1
ENSMUSG00000039157	2.21374	0.000557024	0.011384	Fam102a	UNKNOWN
ENSMUSG00000053617	2.21042	0.000117685	0.00328617	Sh3pxd2a	SH3 AND PX DOMAIN CONTAINING 2A FIVE SH3 DOMAIN CONTAINING SH3 MULTIPLE DOMAINS 1 TYROSINE KINASE SUBSTRATE WITH FIVE SH3 DOMAINS
ENSMUSG00000021703	2.20697	0.00362068	0.0473742	Serinc5	SERINE INCORPORATOR
ENSMUSG00000022265	2.2056	1.64727e-12	6.08354e-10	Ank	PROGRESSIVE ANKYLOSIS HOMOLOG ANK
ENSMUSG00000030123	2.20176	2.12089e-12	7.51511e-10	Plxnd1	PLEXIN PRECURSOR
ENSMUSG00000044390	2.20124	0.00044919	0.00964637	Tigd3	TIGGER TRANSPOSABLE ELEMENT DERIVED 3
ENSMUSG00000028214	2.19403	6.28818e-07	4.39686e-05	Gem	GTP BINDING REM RAD AND GEM GTP BINDING
ENSMUSG00000040631	2.19282	1.1755e-06	7.33875e-05	Dok4	DOCKING DOWNSTREAM OF TYROSINE KINASE
ENSMUSG00000049409	2.19111	0.000612126	0.0121965	Prokr1	PROKINETICIN RECEPTOR 2 PK R2 G COUPLED RECEPTOR 73 1
ENSMUSG00000068744	2.18462	1.32188e-13	6.30201e-11	Psrc1	PROLINE/SERINE RICH COILED COIL 1
ENSMUSG00000081199	2.1827	0.000398348	0.00872604	Gm16407
ENSMUSG00000062661	2.17957	1.12782e-06	7.09174e-05	Ncs1	UNKNOWN
ENSMUSG00000027412	2.17388	0.00778157	0.083169	Lpin3	PHOSPHATIDATE PHOSPHATASE EC_3.1.3.4 LIPIN
ENSMUSG00000039153	2.17152	0.000106789	0.00305355	Runx2	RUNT RELATED TRANSCRIPTION FACTOR ACUTE MYELOID LEUKEMIA CORE BINDING FACTOR SUBUNIT ALPHA CBF ALPHA ONCOGENE AML POLYOMAVIRUS ENHANCER BINDING 2 ALPHA SUBUNIT PEA2 ALPHA PEBP2 ALPHA SL3 3 ENHANCER FACTOR 1 ALPHA SUBUNIT SL3/AKV CORE BINDING FACTOR ALPHA
ENSMUSG00000073557	2.16604	1.68382e-07	1.42656e-05	Ppp1r12b	PHOSPHATASE 1 REGULATORY SUBUNIT 12A MYOSIN PHOSPHATASE TARGETING SUBUNIT 1 MYOSIN PHOSPHATASE TARGET SUBUNIT 1 PHOSPHATASE MYOSIN BINDING SUBUNIT
ENSMUSG00000063455	2.15868	0.000535893	0.0110817	D630045J12Rik	AMBIGUOUS
ENSMUSG00000034382	2.1559	7.24218e-05	0.00222102	AI661453	UNCHARACTERIZED
ENSMUSG00000046598	2.15304	7.45204e-10	1.41594e-07	Bdh1	D BETA HYDROXYBUTYRATE DEHYDROGENASE MITOCHONDRIAL PRECURSOR BDH EC_1.1.1.30 3 HYDROXYBUTYRATE DEHYDROGENASE
ENSMUSG00000048752	2.15042	0.0020781	0.0314063	Prss50	PROBABLE THREONINE PROTEASE PRSS50 PRECURSOR EC_3.4.25.- SERINE PROTEASE 50 TESTIS SPECIFIC PROTEASE 50
ENSMUSG00000057982	2.14897	3.33663e-12	1.15118e-09	Zfp809	ZINC FINGER
ENSMUSG00000007613	2.14442	5.83237e-05	0.00186957	Tgfbr1	TGF BETA RECEPTOR TYPE 1 PRECURSOR TGFR 1 EC_2.7.11.30 TRANSFORMING GROWTH FACTOR BETA RECEPTOR TYPE I TGF BETA RECEPTOR TYPE I TBETAR I
ENSMUSG00000020882	2.13476	5.40993e-05	0.00176655	Cacnb1	VOLTAGE DEPENDENT L TYPE CALCIUM CHANNEL SUBUNIT BETA CALCIUM CHANNEL VOLTAGE DEPENDENT SUBUNIT BETA
ENSMUSG00000038515	2.12882	1.08734e-06	6.90341e-05	Grtp1	GROWTH HORMONE REGULATED TBC 1
ENSMUSG00000048200	2.12246	0.00141651	0.0233599	Efcab4a	EF HAND CALCIUM BINDING DOMAIN CONTAINING 4A
ENSMUSG00000029392	2.12104	1.26239e-09	2.2672e-07	Rilpl1	RILP 1 RAB INTERACTING LYSOSOMAL 1
ENSMUSG00000038963	2.10132	5.83868e-07	4.14894e-05	Slco4a1	SOLUTE CARRIER ORGANIC ANION TRANSPORTER FAMILY MEMBER ORGANIC ANION TRANSPORTING POLYPEPTIDE ORGANIC ANION SOLUTE CARRIER FAMILY 21 MEMBER
ENSMUSG00000038009	2.09234	0.000378917	0.00835626	Dnajc22	DNAJ HOMOLOG SUBFAMILY C MEMBER 22
ENSMUSG00000040616	2.08754	0.00952488	0.0963565	Tmem51	TRANSMEMBRANE 51
ENSMUSG00000056486	2.0821	0.00338001	0.0448972	Chn1	N CHIMAERIN A CHIMAERIN ALPHA CHIMERIN N CHIMERIN NC RHO GTPASE ACTIVATING 2
ENSMUSG00000063275	2.08097	8.5244e-07	5.54636e-05	Ptpla	VERY LONG CHAIN 3R 3 HYDROXYACYL [ACYL CARRIER PROTEIN] DEHYDRATASE 2 EC_4.2.1.134 3 HYDROXYACYL COA DEHYDRATASE 2 HACD2 TYROSINE PHOSPHATASE MEMBER B
ENSMUSG00000040563	2.07973	7.23607e-06	0.00034003	BC018242	LIPID PHOSPHATE PHOSPHATASE RELATED TYPE PLASTICITY RELATED GENE PRG
ENSMUSG00000092827	2.07936	4.55896e-05	0.00154845	Mir3091
ENSMUSG00000026435	2.07614	5.25497e-09	7.44813e-07	Slc45a3	SOLUTE CARRIER FAMILY 45 MEMBER 3 PROSTATE CANCER ASSOCIATED 6 PROSTEIN
ENSMUSG00000074570	2.06748	1.90727e-08	2.22269e-06	Cass4	CAS SCAFFOLDING FAMILY MEMBER 4
ENSMUSG00000032431	2.06152	8.53908e-11	2.13241e-08	Crtap	SYNAPTONEMAL COMPLEX SC65 LEPRECAN 4
ENSMUSG00000018648	2.05599	0.00258173	0.0369517	Dusp14	DUAL SPECIFICITY PHOSPHATASE EC_3.1.3.16 EC_3.1.3.- 48
ENSMUSG00000031666	2.05207	2.16517e-11	6.10461e-09	Rbl2	RETINOBLASTOMA 2.130 KDA RETINOBLASTOMA ASSOCIATED P130 RETINOBLASTOMA RELATED 2 RBR 2 PRB2
ENSMUSG00000023984	2.04674	0.00369443	0.0481469	Gm20517	MEDIATOR OF RNA POLYMERASE II TRANSCRIPTION SUBUNIT 20 MEDIATOR COMPLEX SUBUNIT 20 TRF PROXIMAL HOMOLOG
ENSMUSG00000045176	2.04605	2.74141e-09	4.38308e-07	2310047M10Rik	UNCHARACTERIZED
ENSMUSG00000019874	2.04434	0.000581769	0.0117614	Fabp7	FATTY ACID BINDING PROTEIN TYPE FATTY ACID BINDING FABP FATTY ACID BINDING
ENSMUSG00000020184	2.04313	2.83711e-10	6.04812e-08	Mdm2	E3 UBIQUITIN LIGASE MDM2 EC_6.3.2.- DOUBLE MINUTE 2 P53 BINDING MDM2
ENSMUSG00000029816	2.04132	0.000707417	0.0136391	Gpnmb	TRANSMEMBRANE GLYCOPROTEIN NMB PRECURSOR
ENSMUSG00000031563	2.04029	0.00498028	0.0600248	Wwc2	WW DOMAIN CONTAINING
ENSMUSG00000072825	2.0396	8.44211e-07	5.51946e-05	Cep170b	UNKNOWN
ENSMUSG00000043079	2.03199	9.98812e-08	9.12538e-06	Synpo	SYNAPTOPODIN
ENSMUSG00000031788	2.01874	1.9935e-09	3.28752e-07	Kifc3	KINESIN
ENSMUSG00000025855	2.01686	0.00104555	0.0186247	Prkar1b	CAMP DEPENDENT KINASE TYPE I REGULATORY SUBUNIT
ENSMUSG00000022178	2.01129	4.01382e-08	4.15993e-06	Ajuba	LIM DOMAIN CONTAINING
ENSMUSG00000009772	2.01028	1.83841e-09	3.11e-07	Nuak2	NUAK FAMILY SNF1 KINASE EC_2.7.11.1
ENSMUSG00000022994	2.00378	0.00138483	0.0230405	Adcy6	ADENYLATE CYCLASE TYPE EC_4.6.1.1 ATP PYROPHOSPHATE LYASE ADENYLATE CYCLASE TYPE ADENYLYL CYCLASE CA 2+ ADENYLYL CYCLASE
ENSMUSG00000083119	1.98697	0.00738451	0.0799791	Gm14724
ENSMUSG00000071073	1.98499	4.70684e-05	0.00159455	Lrrc73	LEUCINE RICH REPEAT CONTAINING 73
ENSMUSG00000048424	1.98444	4.62347e-06	0.000237048	Ranbp3l	RAN BINDING 3
ENSMUSG00000014361	1.98166	0.00477162	0.0581913	Mertk	TYROSINE KINASE PRECURSOR EC_2.7.10.1
ENSMUSG00000042289	1.97802	7.4793e-09	1.00711e-06	Hsd3b7	3 BETA HYDROXYSTEROID DEHYDROGENASE/DELTA 5 >4 ISOMERASE TYPE 3 BETA HYDROXYSTEROID DEHYDROGENASE/DELTA 5 >4 ISOMERASE TYPE 3 BETA HSD [INCLUDES 3 BETA HYDROXY DELTA 5 STEROID DEHYDROGENASE EC_1.1.1.145 3 BETA HYDROXY 5 ENE STEROID DEHYDROGENASE PROGESTER
ENSMUSG00000029153	1.97776	7.22045e-09	9.80971e-07	Ociad2	OCIA DOMAIN CONTAINING 2
ENSMUSG00000093577	1.97547	0.00426556	0.053541	Gm20632
ENSMUSG00000000531	1.97363	0.00583998	0.0672803	Grasp	GENERAL RECEPTOR PHOSPHOINOSITIDES 1 ASSOCIATED SCAFFOLD GRP1 ASSOCIATED SCAFFOLD
ENSMUSG00000048965	1.97033	0.000673638	0.0131035	Mrgpre	MAS RELATED G COUPLED RECEPTOR MEMBER E
ENSMUSG00000014778	1.96897	4.43396e-09	6.68177e-07	Fhod1	FH1/FH2 DOMAIN CONTAINING 1 FORMIN HOMOLOG OVEREXPRESSED IN SPLEEN 1 FHOS FORMIN HOMOLOGY 2 DOMAIN CONTAINING 1
ENSMUSG00000095440	1.96643	0.00333072	0.0443099	Fignl2	SPASTIN EC_3.6.4.3
ENSMUSG00000057337	1.96139	9.26213e-06	0.000417148	Chst3	CARBOHYDRATE SULFOTRANSFERASE 3 EC_2.8.2.17 CHONDROITIN 6 O SULFOTRANSFERASE 1 C6ST 1 SULFOTRANSFERASE
ENSMUSG00000004698	1.95709	0.000275124	0.00648744	Hdac9	HISTONE DEACETYLASE EC_3.5.1.98
ENSMUSG00000029158	1.95682	0.00095479	0.0172897	Yipf7	YIPF5 YIP1 FAMILY MEMBER 5
ENSMUSG00000032281	1.95623	0.00252346	0.0364484	Acsbg1	LONG CHAIN FATTY ACID COA LIGASE EC_6.2.1.3 ACYL COA SYNTHETASE BUBBLEGUM FAMILY MEMBER
ENSMUSG00000034783	1.9528	6.03716e-06	0.000294787	Cd207	C TYPE LECTIN DOMAIN FAMILY 4 MEMBER K LANGERIN CD207 ANTIGEN
ENSMUSG00000042595	1.95246	6.33033e-08	6.19357e-06	Fam199x	UNKNOWN
ENSMUSG00000029075	1.95044	1.22021e-05	0.000517003	Tnfrsf4	TUMOR NECROSIS FACTOR RECEPTOR SUPERFAMILY MEMBER 4 PRECURSOR ANTIGEN OX40L RECEPTOR CD134 ANTIGEN
ENSMUSG00000036564	1.94706	2.46895e-10	5.35027e-08	Ndrg4	N MYC DOWNSTREAM REGULATED GENE
ENSMUSG00000028167	1.94514	6.81564e-10	1.31407e-07	Bdh2	3 HYDROXYBUTYRATE DEHYDROGENASE TYPE 2 EC_1.1.1.- EC_1.1.1.30 DEHYDROGENASE/REDUCTASE SDR FAMILY MEMBER 6 R BETA HYDROXYBUTYRATE DEHYDROGENASE
ENSMUSG00000041895	1.94153	1.49942e-05	0.000613359	Wipi1	WD REPEAT DOMAIN PHOSPHOINOSITIDE INTERACTING WIPI
ENSMUSG00000096296	1.93715	0.000680662	0.0132009	Snord88c
ENSMUSG00000021903	1.9311	0.000173049	0.00446167	Galnt15	POLYPEPTIDE N ACETYLGALACTOSAMINYLTRANSFERASE EC_2.4.1.41 POLYPEPTIDE GALNAC TRANSFERASE GALNAC PP GANTASE UDP ACETYLGALACTOSAMINYLTRANSFERASE UDP GALNAC:POLYPEPTIDE N ACETYLGALACTOSAMINYLTRANSFERASE
ENSMUSG00000035834	1.93035	1.92281e-10	4.38418e-08	Polr3g	DNA DIRECTED RNA POLYMERASE III SUBUNIT RPC7 RNA POLYMERASE III SUBUNIT C7 DNA DIRECTED RNA POLYMERASE III SUBUNIT G
ENSMUSG00000038068	1.92852	7.5015e-06	0.000350559	Rnf144b	PROBABLE E3 UBIQUITIN LIGASE RNF144A EC_6.3.2.- RING FINGER 144A
ENSMUSG00000008090	1.92722	7.23184e-07	4.88727e-05	Fgfrl1	FIBROBLAST GROWTH FACTOR RECEPTOR 1 PRECURSOR FGF RECEPTOR 1 FIBROBLAST GROWTH FACTOR RECEPTOR 5 FGFR 5
ENSMUSG00000044813	1.91402	5.25099e-08	5.27134e-06	Shb	SH2 DOMAIN CONTAINING ADAPTER
ENSMUSG00000028919	1.91386	0.00560707	0.0652566	Arhgef19	GUANINE NUCLEOTIDE EXCHANGE FACTOR
ENSMUSG00000023571	1.90609	4.89873e-07	3.58797e-05	Fam132a	FAM132A PRECURSOR
ENSMUSG00000059839	1.90557	7.88505e-06	0.000365936	Zfp874b	ZINC FINGER
ENSMUSG00000020434	1.9041	6.74566e-05	0.0021183	4921536K21Rik	UNCHARACTERIZED
ENSMUSG00000024617	1.90332	0.000123545	0.00340639	Camk2a	CALCIUM/CALMODULIN DEPENDENT KINASE TYPE II SUBUNIT CAM KINASE II SUBUNIT CAMK II SUBUNIT EC_2.7.11.17
ENSMUSG00000064372	1.90115	0.000332648	0.00752576	mt-Tp
ENSMUSG00000032725	1.89472	0.00610357	0.0694023	Folr2	FOLATE RECEPTOR PRECURSOR FR FOLATE RECEPTOR
ENSMUSG00000040363	1.89228	0.000134918	0.0036698	Bcor	BCL 6 COREPRESSOR 1 BCOR L1 BCOR 1
ENSMUSG00000020668	1.8916	1.2023e-08	1.45376e-06	Kif3c	KINESIN
ENSMUSG00000008153	1.88958	0.0018265	0.0284567	Clstn3	CALSYNTENIN PRECURSOR ALCADEIN ALC
ENSMUSG00000031376	1.88195	0.00655316	0.0729331	Atp2b3	PLASMA MEMBRANE CALCIUM TRANSPORTING ATPASE EC_3.6.3.8 PLASMA MEMBRANE CALCIUM ATPASE PLASMA MEMBRANE CALCIUM PUMP
ENSMUSG00000093989	1.8792	2.31258e-05	0.000882652	Rnasek	RIBONUCLEASE KAPPA RNASE K RNASE KAPPA EC_3.1.-.-
ENSMUSG00000038074	1.87589	2.46155e-05	0.000928697	Fkbp14	PEPTIDYL PROLYL CIS TRANS ISOMERASE PRECURSOR PPIASE EC_5.2.1.8 KDA FK506 BINDING KDA FKBP FKBP FK506 BINDING FKBP ROTAMASE
ENSMUSG00000070565	1.87529	0.000336649	0.00759661	Rasal2	RAS GTPASE ACTIVATING
ENSMUSG00000042363	1.86554	1.16072e-08	1.4222e-06	Lgalsl	GALECTIN RELATED LECTIN GALACTOSIDE BINDING
ENSMUSG00000008398	1.86268	9.81062e-09	1.25257e-06	Elk3	ETS DOMAIN CONTAINING ELK 4 SERUM RESPONSE FACTOR ACCESSORY 1 SAP 1 SRF ACCESSORY 1
ENSMUSG00000091055	1.86226	0.0071151	0.0777678	Siglec15	SIALIC ACID BINDING IG LECTIN 15 PRECURSOR SIGLEC 15 CD33 ANTIGEN 3
ENSMUSG00000025578	1.85469	8.462e-07	5.51946e-05	Cbx8	CHROMOBOX HOMOLOG 8 POLYCOMB 3 HOMOLOG PC3
ENSMUSG00000010307	1.85032	1.11171e-05	0.000482134	Tmem86a	LYSOPLASMALOGENASE TMEM86A TRANSMEMBRANE 86A
ENSMUSG00000035342	1.85027	3.70961e-05	0.00131445	Lzts2	LEUCINE ZIPPER TUMOR SUPPRESSOR
ENSMUSG00000051212	1.84772	1.28505e-09	2.29219e-07	Gpr183	G COUPLED RECEPTOR 183 EPSTEIN BARR VIRUS INDUCED G COUPLED RECEPTOR 2 EBI2 EBV INDUCED G COUPLED RECEPTOR 2
ENSMUSG00000053040	1.84405	0.00166891	0.0265143	Aph1c	GAMMA SECRETASE SUBUNIT APH
ENSMUSG00000028413	1.84015	3.80772e-08	3.96199e-06	B4galt1	BETA 1 4 GALACTOSYLTRANSFERASE BETA 1 4 GALTASE BETA4GAL B4GAL EC_2.4.1.- UDP GAL:BETA GLCNAC BETA 1 4 GALACTOSYLTRANSFERASE UDP GALACTOSE:BETA N ACETYLGLUCOSAMINE BETA 1 4 GALACTOSYLTRANSFERASE [INCLUDES N ACETYLLACTOSAMINE SYNTHASE NAL SYNTHASE ; BETA N
ENSMUSG00000054150	1.83276	1.48245e-08	1.76688e-06	Syne3	NESPRIN 3 NUCLEAR ENVELOPE SPECTRIN REPEAT 3
ENSMUSG00000002083	1.83144	1.15991e-08	1.4222e-06	Bbc3	BCL 2 BINDING COMPONENT 3 P53 UP REGULATED MODULATOR OF APOPTOSIS
ENSMUSG00000030407	1.83066	7.73773e-08	7.29824e-06	Qpctl	GLUTAMINYL PEPTIDE CYCLOTRANSFERASE PRECURSOR EC_2.3.2.5 GLUTAMINYL CYCLASE QC GLUTAMINYL TRNA CYCLOTRANSFERASE
ENSMUSG00000045092	1.82714	0.00785961	0.0836391	S1pr1	SPHINGOSINE 1 PHOSPHATE RECEPTOR S1P RECEPTOR ENDOTHELIAL DIFFERENTIATION G COUPLED RECEPTOR SPHINGOSINE 1 PHOSPHATE RECEPTOR EDG S1P RECEPTOR EDG
ENSMUSG00000001036	1.82579	7.7286e-08	7.29824e-06	Epn2	EPSIN EPS 15 INTERACTING
ENSMUSG00000054951	1.82433	5.96759e-07	4.22909e-05	9130008F23Rik	AMBIGUOUS
ENSMUSG00000050199	1.82315	9.53761e-05	0.00278802	Lgr4	LEUCINE RICH REPEAT CONTAINING G COUPLED RECEPTOR PRECURSOR
ENSMUSG00000037573	1.82276	7.18924e-07	4.88365e-05	Tob1	TRANSDUCER OF ERBB 2
ENSMUSG00000074873	1.82197	1.1494e-07	1.02862e-05	AI606181	AMBIGUOUS
ENSMUSG00000044816	1.81705	6.66621e-09	9.10389e-07	D630023F18Rik	UNCHARACTERIZED
ENSMUSG00000023266	1.81311	0.00011157	0.00315245	Frs3	FIBROBLAST GROWTH FACTOR RECEPTOR SUBSTRATE 3 FGFR SUBSTRATE 3 FGFR SIGNALING ADAPTOR SNT2 SUC1 ASSOCIATED NEUROTROPHIC FACTOR TARGET 2 SNT 2
ENSMUSG00000013419	1.81149	4.48716e-06	0.000231194	Zfp651	ZINC FINGER
ENSMUSG00000049551	1.81144	7.71881e-05	0.00233443	Fzd9	FRIZZLED PRECURSOR FZ
ENSMUSG00000064741	1.81088	0.00302013	0.0412238	Snord14a
ENSMUSG00000074361	1.81041	5.20944e-05	0.00171389	C5ar2	C5A ANAPHYLATOXIN CHEMOTACTIC RECEPTOR 1 C5A ANAPHYLATOXIN CHEMOTACTIC RECEPTOR C5A R C5AR CD88 ANTIGEN
ENSMUSG00000029207	1.80826	0.00154829	0.0250184	Apbb2	AMYLOID BETA A4 PRECURSOR BINDING FAMILY B MEMBER
ENSMUSG00000039713	1.80393	1.26381e-05	0.000530212	Plekhg5	PLECKSTRIN HOMOLOGY DOMAIN CONTAINING FAMILY G MEMBER PH DOMAIN CONTAINING FAMILY G MEMBER
ENSMUSG00000040857	1.80318	1.06092e-06	6.75204e-05	Erf	ETS TRANSLOCATION VARIANT 3
ENSMUSG00000023990	1.80156	4.66584e-07	3.4366e-05	Tfeb	TRANSCRIPTION FACTOR
ENSMUSG00000026771	1.80059	2.557e-08	2.80531e-06	Spopl	SPECKLE TYPE POZ
ENSMUSG00000062175	1.79017	4.24062e-07	3.17514e-05	Tgif2	HOMEOBOX 5' TG 3' INTERACTING FACTOR
ENSMUSG00000067430	1.78907	4.901e-05	0.00164334	Zfp763	ZINC FINGER
ENSMUSG00000027187	1.78624	0.000169169	0.00439622	Cat	CATALASE EC_1.11.1.6
ENSMUSG00000022353	1.77797	4.13702e-08	4.27074e-06	Mtss1	METASTASIS SUPPRESSOR 1 MISSING IN METASTASIS
ENSMUSG00000021690	1.77384	2.3776e-08	2.66423e-06	Jmy	WASP HOMOLOG ASSOCIATED WITH ACTIN MEMBRANES AND MICROTUBULES WAS HOMOLOGY REGION 2 DOMAIN CONTAINING 1 WH2 DOMAIN CONTAINING 1
ENSMUSG00000027670	1.76811	0.00419663	0.0529267	Ocstamp	OSTEOCLAST STIMULATORY TRANSMEMBRANE OC STAMP
ENSMUSG00000040841	1.76631	0.00320479	0.0430324	Six5	HOMEOBOX SINE OCULIS HOMEOBOX HOMOLOG
ENSMUSG00000038271	1.76433	9.00222e-08	8.34966e-06	Iffo1	INTERMEDIATE FILAMENT FAMILY ORPHAN
ENSMUSG00000031508	1.76358	4.55419e-08	4.62851e-06	Ankrd10	ANKYRIN REPEAT DOMAIN CONTAINING 10
ENSMUSG00000049577	1.76356	6.17104e-07	4.34976e-05	Zfpm1	ZINC FINGER ZFPM1 FRIEND OF GATA 1 FOG 1 FRIEND OF GATA 1 ZINC FINGER MULTITYPE 1
ENSMUSG00000017400	1.7607	2.66663e-06	0.000150047	Stac2	SH3 AND CYSTEINE RICH DOMAIN CONTAINING SRC HOMOLOGY 3 AND CYSTEINE RICH DOMAIN CONTAINING
ENSMUSG00000031880	1.75996	6.91156e-06	0.000327718	Rrad	GTP BINDING REM RAD AND GEM GTP BINDING
ENSMUSG00000047473	1.75739	0.00160359	0.0257015	Zfp30	ZINC FINGER
ENSMUSG00000029376	1.75517	1.94953e-07	1.61768e-05	Mthfd2l	PROBABLE BIFUNCTIONAL METHYLENETETRAHYDROFOLATE DEHYDROGENASE/CYCLOHYDROLASE 2 NADP DEPENDENT METHYLENETETRAHYDROFOLATE DEHYDROGENASE 2 MTHFD2 [INCLUDES NAD DEPENDENT METHYLENETETRAHYDROFOLATE DEHYDROGENASE EC_1.5.1.15 ; METHENYLTETRAHYDROFOLATE CYCLOHY
ENSMUSG00000020812	1.75408	1.03576e-08	1.29327e-06	1810032O08Rik	AMBIGUOUS
ENSMUSG00000022421	1.75186	9.29565e-05	0.00273471	Nptxr	NEURONAL PENTRAXIN PRECURSOR NEURONAL PENTRAXIN NP
ENSMUSG00000019478	1.75101	1.15234e-05	0.000494523	Rab4a	RAS RELATED RAB
ENSMUSG00000063364	1.74534	0.00107139	0.0189313	3300002I08Rik	I08RIKRIKEN I08UNCHARACTERIZED
ENSMUSG00000031438	1.74483	1.8578e-07	1.55138e-05	Rnf128	E3 UBIQUITIN LIGASE EC_6.3.2.- RING FINGER
ENSMUSG00000029762	1.74063	2.48986e-05	0.000938025	Akr1b8	REDUCTASE ALDO KETO REDUCTASE FAMILY 1 MEMBER
ENSMUSG00000054582	1.74055	0.000748827	0.0143426	Pabpc1l	POLYADENYLATE BINDING PROTEIN CYTOPLASMIC AND NUCLEAR PABP POLY A BINDING POLYADENYLATE TAIL BINDING
ENSMUSG00000040722	1.73518	1.02769e-07	9.3566e-06	Scamp5	SECRETORY CARRIER ASSOCIATED MEMBRANE SECRETORY CARRIER MEMBRANE
ENSMUSG00000034936	1.73179	0.000797299	0.015038	Arl4d	ADP RIBOSYLATION FACTOR ADP RIBOSYLATION FACTOR
ENSMUSG00000020883	1.73149	8.09615e-07	5.36084e-05	Fbxl20	F BOX/LRR REPEAT F BOX AND LEUCINE RICH REPEAT
ENSMUSG00000030556	1.72971	1.32147e-07	1.15887e-05	Lrrc28	LEUCINE RICH REPEAT CONTAINING 28
ENSMUSG00000033871	1.72867	2.60506e-05	0.000970275	Ppargc1b	PEROXISOME PROLIFERATOR ACTIVATED RECEPTOR GAMMA COACTIVATOR 1 BETA PGC 1 BETA PPAR GAMMA COACTIVATOR 1 BETA PPARGC 1 BETA
ENSMUSG00000006800	1.7285	0.000566246	0.0114919	Sulf2	EXTRACELLULAR SULFATASE SULF PRECURSOR EC_3.1.6.-
ENSMUSG00000050022	1.72825	7.35897e-06	0.000344571	Amz1	ARCHAEMETZINCIN 1 EC_3.4.-.- ARCHEOBACTERIAL METALLOPROTEINASE 1
ENSMUSG00000042155	1.72371	7.54933e-05	0.00229642	Klhl23	KELCH 23
ENSMUSG00000042476	1.7232	7.28682e-08	6.94852e-06	Abcb4	MULTIDRUG RESISTANCE EC_3.6.3.44 ATP BINDING CASSETTE SUB FAMILY B MEMBER P GLYCOPROTEIN
ENSMUSG00000035877	1.72015	7.10034e-08	6.84478e-06	Zhx3	ZINC FINGERS AND HOMEOBOXES ZINC FINGER AND HOMEODOMAIN
ENSMUSG00000042121	1.71974	0.000271804	0.00643229	Ssh1	PHOSPHATASE SLINGSHOT HOMOLOG EC_3.1.3.16 EC_3.1.3.- 48 SSH SSH
ENSMUSG00000022074	1.71927	5.41403e-07	3.88935e-05	Tnfrsf10b	TUMOR NECROSIS FACTOR RECEPTOR SUPERFAMILY MEMBER PRECURSOR RECEPTOR TNF RELATED APOPTOSIS INDUCING LIGAND RECEPTOR TRAIL RECEPTOR TRAIL ANTIGEN
ENSMUSG00000035919	1.715	0.00115619	0.0200771	Bbs9	PTHB1 BARDET BIEDL SYNDROME 9 PARATHYROID HORMONE RESPONSIVE B1 GENE
ENSMUSG00000044092	1.71274	1.38088e-06	8.49956e-05	C130050O18Rik	UNCHARACTERIZED
ENSMUSG00000021403	1.71073	4.93139e-05	0.00165142	Serpinb9b	SERPIN
ENSMUSG00000042099	1.71059	9.08123e-06	0.00041055	Kank3	KN MOTIF AND ANKYRIN REPEAT DOMAIN CONTAINING ANKYRIN REPEAT DOMAIN CONTAINING
ENSMUSG00000006219	1.70883	6.50283e-05	0.00205187	Fblim1	FILAMIN BINDING LIM 1 FBLP 1
ENSMUSG00000059708	1.70836	0.000280498	0.00656928	Akap17b	A KINASE ANCHOR AKAP KINASE A ANCHORING SPLICING FACTOR ARGININE/SERINE RICH
ENSMUSG00000040430	1.70554	9.71379e-06	0.00043391	Pitpnc1	CYTOPLASMIC PHOSPHATIDYLINOSITOL TRANSFER 1 MAMMALIAN RDGB HOMOLOG BETA M RDGB BETA MRDGBBETA RETINAL DEGENERATION B HOMOLOG BETA RDGBBETA
ENSMUSG00000003573	1.70531	1.27703e-06	7.87884e-05	Homer3	HOMER HOMOLOG HOMER VASP/ENA RELATED GENE UP REGULATED DURING SEIZURE AND LTP VESL
ENSMUSG00000031840	1.70287	0.000470266	0.00994422	Rab3a	RAS RELATED RAB 3
ENSMUSG00000052609	1.70035	7.59795e-07	5.08229e-05	Plekhg3	PLECKSTRIN HOMOLOGY DOMAIN CONTAINING FAMILY G MEMBER PH DOMAIN CONTAINING FAMILY G MEMBER
ENSMUSG00000048756	1.6961	3.47465e-07	2.67967e-05	Foxo3	FORKHEAD BOX O
ENSMUSG00000030259	1.6947	0.00158011	0.0253874	Rassf8	RAS ASSOCIATION DOMAIN CONTAINING 8 CARCINOMA ASSOCIATED HOJ 1
ENSMUSG00000030872	1.69411	1.08035e-07	9.7013e-06	Gga2	ADP RIBOSYLATION FACTOR BINDING GAMMA ADAPTIN RELATED GOLGI LOCALIZED GAMMA EAR CONTAINING ARF BINDING
ENSMUSG00000041202	1.69177	0.000740129	0.0141863	Pla2g2d	GROUP IID SECRETORY PHOSPHOLIPASE A2 PRECURSOR GIID SPLA2 SPLA2 IID EC_3.1.1.4 PLA2IID PHOSPHATIDYLCHOLINE 2 ACYLHYDROLASE 2D SECRETORY TYPE PLA STROMA ASSOCIATED HOMOLOG
ENSMUSG00000026189	1.69007	4.02435e-07	3.03226e-05	Pecr	PEROXISOMAL TRANS 2 ENOYL COA REDUCTASE TERP EC_1.3.1.38 2 4 DIENOYL COA REDUCTASE
ENSMUSG00000027488	1.68908	0.000133251	0.00363578	Snta1	1 SYNTROPHIN 59 KDA DYSTROPHIN ASSOCIATED A1 COMPONENT 1 SYNTROPHIN
ENSMUSG00000020439	1.68853	0.00320664	0.0430324	Smtn	SMOOTHELIN
ENSMUSG00000019872	1.68456	6.2919e-06	0.000303272	Smpdl3a	ACID SPHINGOMYELINASE PHOSPHODIESTERASE PRECURSOR ASM PHOSPHODIESTERASE EC_3.1.4.-
ENSMUSG00000053935	1.67764	1.94957e-08	2.25197e-06	Atf7ip	ACTIVATING TRANSCRIPTION FACTOR 7 INTERACTING 1
ENSMUSG00000073274	1.67372	0.000665309	0.0129993	Gm14636
ENSMUSG00000049588	1.67209	0.000353343	0.00791204	Ccdc69	COILED COIL DOMAIN CONTAINING 69
ENSMUSG00000071042	1.67053	5.11176e-10	1.01542e-07	Rasgrp3	RAS GUANYL RELEASING CALCIUM AND DAG REGULATED GUANINE NUCLEOTIDE EXCHANGE FACTOR CALDAG
ENSMUSG00000000253	1.66861	9.39246e-08	8.67182e-06	Gmpr	GMP REDUCTASE EC_1.7.1.7 GUANOSINE 5' MONOPHOSPHATE OXIDOREDUCTASE GUANOSINE MONOPHOSPHATE REDUCTASE
ENSMUSG00000034487	1.66736	5.37152e-08	5.35539e-06	Kdelc2	KDEL MOTIF CONTAINING 1 PRECURSOR ENDOPLASMIC RETICULUM RESIDENT 58 ER 58 ERP58
ENSMUSG00000047415	1.66138	0.000132356	0.0036151	Gpr68	G COUPLED RECEPTOR
ENSMUSG00000025856	1.65987	0.00416739	0.0527381	Pdgfa	PLATELET DERIVED GROWTH FACTOR SUBUNIT A PRECURSOR PDGF SUBUNIT A PDGF 1 PLATELET DERIVED GROWTH FACTOR A CHAIN PLATELET DERIVED GROWTH FACTOR ALPHA POLYPEPTIDE
ENSMUSG00000025255	1.6581	0.000589309	0.0118408	Zfhx4	ZINC FINGER HOMEOBOX 3 AT MOTIF BINDING FACTOR AT BINDING TRANSCRIPTION FACTOR 1 ALPHA FETOPROTEIN ENHANCER BINDING ZINC FINGER HOMEODOMAIN 3 ZFH 3
ENSMUSG00000007817	1.65311	1.66465e-06	0.000100342	Zmiz1	ZINC FINGER MIZ DOMAIN CONTAINING 1 PIAS ZIMP10 RETINOIC ACID INDUCED 17
ENSMUSG00000071192	1.65301	0.00116024	0.0201341	Wfikkn1	WAP KAZAL IMMUNOGLOBULIN KUNITZ AND NTR DOMAIN CONTAINING PRECURSOR GROWTH AND DIFFERENTIATION FACTOR ASSOCIATED SERUM GASP
ENSMUSG00000021054	1.65261	4.53189e-07	3.36631e-05	Sgpp1	SPHINGOSINE 1 PHOSPHATE PHOSPHATASE 1 SPPASE1 EC_3.1.3.- SPHINGOSINE 1 PHOSPHATASE 1
ENSMUSG00000038486	1.65249	0.00138796	0.0230525	Sv2a	SYNAPTIC VESICLE GLYCOPROTEIN
ENSMUSG00000033016	1.65246	3.39249e-08	3.55818e-06	Nfatc1	NUCLEAR FACTOR OF ACTIVATED T CELLS CYTOPLASMIC 1 NF ATC1 NFATC1 NFAT TRANSCRIPTION COMPLEX CYTOSOLIC COMPONENT NF ATC NFATC
ENSMUSG00000040350	1.64582	0.00254845	0.036681	Trim7	TRIPARTITE MOTIF CONTAINING
ENSMUSG00000040495	1.64306	6.81773e-05	0.00213327	Chrm4	MUSCARINIC ACETYLCHOLINE RECEPTOR
ENSMUSG00000034006	1.64155	2.91646e-07	2.31035e-05	Pqlc1	PQ LOOP REPEAT CONTAINING 1
ENSMUSG00000059013	1.63976	0.000345148	0.00774839	Sh2d3c	BREAST CANCER ANTI ESTROGEN RESISTANCE 3
ENSMUSG00000031574	1.63135	0.000619883	0.0123229	Star	STEROIDOGENIC ACUTE REGULATORY PROTEIN MITOCHONDRIAL PRECURSOR STAR START DOMAIN CONTAINING 1 STARD1
ENSMUSG00000028121	1.63126	4.56981e-07	3.37536e-05	Bcar3	BREAST CANCER ANTI ESTROGEN RESISTANCE 3
ENSMUSG00000056458	1.62891	0.0015776	0.0253791	Stk30	SERINE/THREONINE KINASE EC_2.7.11.22 CELL KINASE
ENSMUSG00000054181	1.62804	0.00596987	0.068148	A930012O16Rik
ENSMUSG00000044811	1.62766	6.55384e-07	4.53425e-05	AF251705	CMRF35 MOLECULE 6 PRECURSOR CLM 6 CD300 ANTIGEN FAMILY MEMBER C CD300C ANTIGEN
ENSMUSG00000090673	1.62526	0.000139873	0.00376553	Gm340	UNCHARACTERIZED
ENSMUSG00000051451	1.61904	9.61258e-08	8.81299e-06	Crebzf	CREB/ATF BZIP TRANSCRIPTION FACTOR HOST CELL FACTOR BINDING TRANSCRIPTION FACTOR ZHANGFEI HCF BINDING TRANSCRIPTION FACTOR ZHANGFEI
ENSMUSG00000073700	1.61167	2.75556e-06	0.000154059	Klhl21	KELCH
ENSMUSG00000027111	1.60692	1.99306e-06	0.000116392	Itga6	INTEGRIN ALPHA PRECURSOR CD49 ANTIGEN FAMILY MEMBER VLA ANTIGEN [CONTAINS INTEGRIN ALPHA HEAVY CHAIN; INTEGRIN ALPHA LIGHT CHAIN]
ENSMUSG00000027845	1.6058	0.000871981	0.0161813	Dclre1b	5' EXONUCLEASE APOLLO EC_3.1.-.- DNA CROSS LINK REPAIR 1B SNM1 HOMOLOG B
ENSMUSG00000000881	1.60277	4.3485e-05	0.00149366	Dlg3	DISKS LARGE HOMOLOG SYNAPSE ASSOCIATED SAP
ENSMUSG00000027254	1.60167	0.00274632	0.0385087	Map1a	MICROTUBULE ASSOCIATED MAP [CONTAINS HEAVY CHAIN; LIGHT
ENSMUSG00000021250	1.60053	2.33667e-07	1.8969e-05	Fos	PROTO ONCOGENE C FOS CELLULAR ONCOGENE FOS
ENSMUSG00000032802	1.59708	9.76393e-06	0.000435408	Srxn1	SULFIREDOXIN 1 EC_1.8.98.2
ENSMUSG00000039747	1.59519	1.52776e-07	1.31342e-05	Orai2	CALCIUM RELEASE ACTIVATED CALCIUM CHANNEL 1 ORAI 1 TRANSMEMBRANE 142A
ENSMUSG00000039680	1.5947	1.89601e-07	1.57827e-05	Mrps6	28S RIBOSOMAL S6 MITOCHONDRIAL MRP S6 S6MT
ENSMUSG00000046761	1.5946	2.22525e-06	0.000127398	Fam83h	FAM83H
ENSMUSG00000027230	1.59239	6.36599e-05	0.00201354	Creb3l1	CYCLIC AMP RESPONSIVE ELEMENT BINDING 3 2 CAMP RESPONSIVE ELEMENT BINDING 3 2 [CONTAINS PROCESSED CYCLIC AMP RESPONSIVE ELEMENT BINDING 3 2]
ENSMUSG00000072761	1.59101	8.40954e-05	0.00251806	Gm6712	UNCHARACTERIZED
ENSMUSG00000052180	1.58067	0.00287728	0.039781	Serpinb6c	SERPIN
ENSMUSG00000047037	1.58039	3.62147e-06	0.000193793	Nipa1	MAGNESIUM TRANSPORTER NON IMPRINTED IN PRADER WILLI/ANGELMAN SYNDROME REGION
ENSMUSG00000020674	1.57786	2.95196e-08	3.18532e-06	Pxdn	PRECURSOR
ENSMUSG00000020823	1.57681	3.78173e-06	0.000199935	Sec14l1	REAL TIME
ENSMUSG00000022912	1.57608	0.0021498	0.0322114	Pros1	VITAMIN K DEPENDENT S PRECURSOR
ENSMUSG00000036030	1.57559	1.11891e-05	0.000483345	Prtg	PRECURSOR
ENSMUSG00000036957	1.57356	0.000133708	0.00364067	Lrfn3	LEUCINE RICH REPEAT AND FIBRONECTIN TYPE III DOMAIN CONTAINING PRECURSOR SYNAPTIC ADHESION MOLECULE
ENSMUSG00000045817	1.57104	0.000146055	0.00389989	Zfp36l2	ZINC FINGER 36 TYPE 2 ZFP36 2 BUTYRATE RESPONSE FACTOR 2 TIS11D
ENSMUSG00000003546	1.5707	4.56565e-07	3.37536e-05	Klc4	KINESIN LIGHT CHAIN
ENSMUSG00000042331	1.56941	4.76762e-05	0.00161039	Specc1	CYTOSPIN A SPECC1 SPERM ANTIGEN WITH CALPONIN HOMOLOGY AND COILED COIL DOMAINS 1
ENSMUSG00000085873	1.56845	0.00119822	0.0206428	Gm12750
ENSMUSG00000020788	1.56517	2.84461e-06	0.000157878	Atp2a3	SARCOPLASMIC/ENDOPLASMIC RETICULUM CALCIUM ATPASE SR CA 2+ ATPASE EC_3.6.3.8 CALCIUM PUMP CALCIUM TRANSPORTING ATPASE SARCOPLASMIC RETICULUM TYPE TWITCH SKELETAL MUSCLE ENDOPLASMIC RETICULUM CLASS 1/2 CA 2+ ATPASE
ENSMUSG00000033863	1.56383	0.000878997	0.0162885	Klf9	KRUEPPEL FACTOR 9 BASIC TRANSCRIPTION ELEMENT BINDING 1 BTE BINDING 1 GC BOX BINDING 1 TRANSCRIPTION FACTOR BTEB1
ENSMUSG00000059970	1.55028	0.000552587	0.011342	Hspa2	HEAT SHOCK KDA HEAT SHOCK 70 KDA
ENSMUSG00000035597	1.54955	5.99462e-07	4.23679e-05	Prpf39	PRE PROCESSING FACTOR 39 PRP39 HOMOLOG
ENSMUSG00000060044	1.54593	2.01288e-05	0.000787362	Tmem26	TRANSMEMBRANE 26
ENSMUSG00000015837	1.54349	1.34766e-05	0.000560018	Sqstm1	SEQUESTOSOME 1 UBIQUITIN BINDING P62
ENSMUSG00000034858	1.54345	0.00192691	0.0297559	Fam214a	UNKNOWN
ENSMUSG00000052459	1.54288	4.76169e-05	0.00161039	Atp6v1a	V TYPE PROTON ATPASE CATALYTIC SUBUNIT A V ATPASE SUBUNIT A EC_3.6.3.14 V ATPASE 69 KDA SUBUNIT VACUOLAR PROTON PUMP SUBUNIT ALPHA
ENSMUSG00000026469	1.5415	2.18776e-07	1.79266e-05	Xpr1	XENOTROPIC AND POLYTROPIC RETROVIRUS RECEPTOR 1
ENSMUSG00000039813	1.54117	2.82841e-05	0.00104309	Tbc1d2	TBC1 DOMAIN FAMILY MEMBER
ENSMUSG00000059248	1.5369	3.27566e-05	0.00117659	Sept9	SEPTIN
ENSMUSG00000091898	1.53682	0.00791029	0.0839739	Tnnc1	TROPONIN C SLOW SKELETAL AND CARDIAC MUSCLES TN C
ENSMUSG00000039828	1.53646	1.98648e-06	0.000116266	Wdr70	WD REPEAT CONTAINING 70
ENSMUSG00000009378	1.5348	0.000115518	0.00324304	Slc16a12	MONOCARBOXYLATE TRANSPORTER 12 MCT 12 SOLUTE CARRIER FAMILY 16 MEMBER 12
ENSMUSG00000022951	1.53471	1.75471e-06	0.000105287	Rcan1	CALCIPRESSIN DOWN SYNDROME REGION 1 REGULATOR OF CALCINEURIN
ENSMUSG00000002105	1.53422	7.50931e-07	5.03976e-05	Slc39a13	ZINC TRANSPORTER ZIP13 SOLUTE CARRIER FAMILY 39 MEMBER 13 ZRT AND IRT 13 ZIP 13
ENSMUSG00000024812	1.53173	9.0093e-07	5.81854e-05	Tjp2	TIGHT JUNCTION ZO TIGHT JUNCTION ZONA OCCLUDENS ZONULA OCCLUDENS
ENSMUSG00000021559	1.52898	0.0015379	0.0249383	Dapk1	DEATH ASSOCIATED KINASE DAP KINASE EC_2.7.11.1 DAP KINASE
ENSMUSG00000000594	1.52427	7.34075e-07	4.94812e-05	Gm2a	GANGLIOSIDE GM2 ACTIVATOR PRECURSOR CEREBROSIDE SULFATE ACTIVATOR GM2 AP SPHINGOLIPID ACTIVATOR 3 SAP 3
ENSMUSG00000044167	1.52336	0.000170492	0.00442621	Foxo1	FORKHEAD BOX O
ENSMUSG00000037706	1.52308	7.65198e-07	5.10541e-05	Cd81	ANTIGEN ANTIGEN
ENSMUSG00000097739	1.52154	0.000623657	0.0123663	RP23-58L22.3
ENSMUSG00000037295	1.52045	7.35407e-05	0.00224745	Ldlrap1	LOW DENSITY LIPOPROTEIN RECEPTOR ADAPTER 1 AUTOSOMAL RECESSIVE HYPERCHOLESTEROLEMIA
ENSMUSG00000038500	1.51888	5.11732e-06	0.00025544	Prr3	PROLINE RICH 3 MHC CLASS I REGION PROLINE RICH CAT56
ENSMUSG00000010830	1.51561	0.00115393	0.0200645	Kdelr3	ER LUMEN RETAINING RECEPTOR KDEL ENDOPLASMIC RETICULUM RETENTION RECEPTOR KDEL RECEPTOR
ENSMUSG00000015846	1.5125	1.62e-05	0.000655525	Rxra	RETINOIC ACID RECEPTOR RXR NUCLEAR RECEPTOR SUBFAMILY 2 GROUP B MEMBER RETINOID X RECEPTOR
ENSMUSG00000040997	1.50755	9.05925e-06	0.000410264	Abhd4	1 ACYLGLYCEROL 3 PHOSPHATE O ACYLTRANSFERASE ABHD5 EC_2.3.1.51 ABHYDROLASE DOMAIN CONTAINING 5
ENSMUSG00000014158	1.50128	0.000290264	0.00674736	Trpv4	TRANSIENT RECEPTOR POTENTIAL CATION CHANNEL SUBFAMILY V MEMBER 1 TRPV1 OSM 9 TRP CHANNEL 1 OTRPC1 VANILLOID RECEPTOR 1
ENSMUSG00000037111	1.4936	1.7749e-06	0.000106255	Setd7	HISTONE LYSINE N METHYLTRANSFERASE SETD7 EC_2.1.1.43 HISTONE H3 K4 METHYLTRANSFERASE SETD7 H3 K4 HMTASE SETD7 SET DOMAIN CONTAINING 7 SET7/9
ENSMUSG00000097328	1.48666	0.00176584	0.0277356	Tnfsf12	TUMOR NECROSIS FACTOR LIGAND SUPERFAMILY MEMBER 13 PRECURSOR A PROLIFERATION INDUCING LIGAND APRIL CD256 ANTIGEN
ENSMUSG00000025880	1.48647	0.00028521	0.00664165	Smad7	MOTHERS AGAINST DECAPENTAPLEGIC HOMOLOG 6 MAD HOMOLOG 6 MOTHERS AGAINST DPP HOMOLOG 6 SMAD FAMILY MEMBER 6 SMAD 6 SMAD6
ENSMUSG00000067424	1.48578	0.000284394	0.00664034	Zfp563	ZINC FINGER
ENSMUSG00000027843	1.48539	3.15118e-06	0.00017214	Ptpn22	TYROSINE PHOSPHATASE NON RECEPTOR TYPE EC_3.1.3.48 PHOSPHATASE
ENSMUSG00000077797	1.48537	0.00696769	0.0764115	Snord19
ENSMUSG00000038042	1.47866	0.00666174	0.0738114	Ptpdc1	TYROSINE PHOSPHATASE DOMAIN CONTAINING 1 EC_3.1.3.-
ENSMUSG00000094410	1.47866	0.00055443	0.0113487	Zbed6	ZINC FINGER BED DOMAIN CONTAINING
ENSMUSG00000061898	1.47375	5.65667e-06	0.000277759	Rbak	ZINC FINGER
ENSMUSG00000061524	1.47359	0.000456416	0.00975361	Zic2	ZINC FINGER ZIC ZINC FINGER OF THE CEREBELLUM
ENSMUSG00000026380	1.47313	0.0058295	0.0672151	Tfcp2l1	TRANSCRIPTION FACTOR CP2
ENSMUSG00000037625	1.47199	3.79421e-07	2.90901e-05	Cldn11	CLAUDIN 11
ENSMUSG00000062743	1.4695	0.00767865	0.0824158	Zfp677	ZINC FINGER
ENSMUSG00000019590	1.4662	0.00165825	0.0264483	Cyb561	CYTOCHROME B561 CYTOCHROME B 561
ENSMUSG00000046808	1.46565	4.55694e-06	0.000234289	Atp10d
ENSMUSG00000018381	1.46253	8.57357e-06	0.00039097	Abi3	ABI GENE FAMILY MEMBER 3 NEW MOLECULE INCLUDING SH3 NESH
ENSMUSG00000026321	1.46136	1.22409e-06	7.60587e-05	Tnfrsf11a	TUMOR NECROSIS FACTOR RECEPTOR SUPERFAMILY MEMBER 11A PRECURSOR OSTEOCLAST DIFFERENTIATION FACTOR RECEPTOR ODFR RECEPTOR ACTIVATOR OF NF KB CD265 ANTIGEN
ENSMUSG00000009876	1.45967	0.00223133	0.0331676	Cox4i2	CYTOCHROME C OXIDASE SUBUNIT 4 2 MITOCHONDRIAL PRECURSOR CYTOCHROME C OXIDASE SUBUNIT IV 2 COX IV 2
ENSMUSG00000023067	1.45539	9.74469e-07	6.27802e-05	Cdkn1a	CYCLIN DEPENDENT KINASE INHIBITOR 1 CDK INTERACTING 1 MELANOMA DIFFERENTIATION ASSOCIATED P21
ENSMUSG00000041362	1.45278	0.00190189	0.0294042	4930506M07Rik	SHOOTIN 1
ENSMUSG00000031803	1.4524	0.000112552	0.00317337	B3gnt3	UDP GLCNAC:BETAGAL BETA 1 3 N ACETYLGLUCOSAMINYLTRANSFERASE BGNT BETA 1 3 GN BETA 1 3 N ACETYLGLUCOSAMINYLTRANSFERASE BETA3GN EC_2.4.1.-
ENSMUSG00000034312	1.45142	0.000675587	0.0131316	Iqsec1	IQ MOTIF AND SEC7 DOMAIN CONTAINING
ENSMUSG00000001435	1.44809	1.00196e-05	0.00044454	Col18a1	COLLAGEN ALPHA 1 XVIII CHAIN PRECURSOR[CONTAINS ENDOSTATIN]
ENSMUSG00000054648	1.44664	4.93249e-06	0.0002492	Zfp869	ZINC FINGER
ENSMUSG00000024228	1.44495	1.97494e-06	0.000116178	Nudt12	PEROXISOMAL NADH PYROPHOSPHATASE NUDT12 EC_3.6.1.22 NUCLEOSIDE DIPHOSPHATE LINKED MOIETY X MOTIF 12 NUDIX MOTIF 12
ENSMUSG00000049807	1.44157	0.00194361	0.0298905	Arhgap23	RHO GTPASE ACTIVATING 21 RHO TYPE GTPASE ACTIVATING 21
ENSMUSG00000025372	1.44068	2.27422e-05	0.000873094	Baiap2	BRAIN SPECIFIC ANGIOGENESIS INHIBITOR 1 ASSOCIATED 2 BAI ASSOCIATED 2 BAI1 ASSOCIATED 2 INSULIN RECEPTOR SUBSTRATE OF 53 KDA IRSP53 INSULIN RECEPTOR SUBSTRATE P53
ENSMUSG00000016382	1.43917	2.35925e-06	0.000134483	Pls3	PLASTIN
ENSMUSG00000049288	1.43843	6.33493e-06	0.000304786	Lix1l	LIMB EXPRESSION 1
ENSMUSG00000055013	1.43841	0.0024135	0.0351971	Agap1	ARF GAP WITH GTPASE ANK REPEAT AND PH DOMAIN CONTAINING AGAP CENTAURIN GAMMA
ENSMUSG00000029419	1.43599	0.00911913	0.0932941	Gm996	UNCHARACTERIZED
ENSMUSG00000030409	1.43526	6.79949e-07	4.66726e-05	Dmpk	SERINE/THREONINE KINASE MRCK EC_2.7.11.1 CDC42 BINDING KINASE DMPK MYOTONIC DYSTROPHY KINASE RELATED CDC42 BINDING KINASE MRCK MYOTONIC DYSTROPHY KINASE
ENSMUSG00000020659	1.43371	7.05618e-06	0.000333971	Cbll1	E3 UBIQUITIN LIGASE HAKAI EC_6.3.2.- CASITAS B LINEAGE LYMPHOMA TRANSFORMING SEQUENCE 1 C CBL 1
ENSMUSG00000025986	1.43225	0.000100955	0.00292178	Slc39a10	ZINC TRANSPORTER ZIP6 PRECURSOR SOLUTE CARRIER FAMILY 39 MEMBER 6 ZRT AND IRT 6 ZIP 6
ENSMUSG00000005043	1.43133	1.94948e-06	0.000115389	Sgsh	N SULPHOGLUCOSAMINE SULPHOHYDROLASE PRECURSOR EC_3.10.1.1 SULFOGLUCOSAMINE SULFAMIDASE SULPHAMIDASE
ENSMUSG00000020034	1.43099	0.000462948	0.00984759	Tcp11l2	T COMPLEX 11
ENSMUSG00000038366	1.42704	1.73669e-05	0.000693118	Lasp1	LIM AND SH3 DOMAIN 1 LASP 1
ENSMUSG00000034265	1.42192	4.46914e-05	0.00152784	Zdhhc14	PALMITOYLTRANSFERASE EC_2.3.1.- ZINC FINGER DHHC DOMAIN CONTAINING DHHC
ENSMUSG00000045312	1.41985	5.96527e-05	0.00190518	Lhfpl2	LIPOMA HMGIC FUSION PARTNER 2
ENSMUSG00000070639	1.4166	1.93654e-05	0.000765612	Lrrc8b	LEUCINE RICH REPEAT CONTAINING
ENSMUSG00000005951	1.41543	2.80574e-05	0.00103765	Shpk	SEDOHEPTULOKINASE SHK EC_2.7.1.14 CARBOHYDRATE KINASE
ENSMUSG00000038593	1.41513	2.00336e-05	0.00078632	Tctn1	TECTONIC 1 PRECURSOR
ENSMUSG00000002799	1.41346	0.00240166	0.0350635	Jag2	JAGGED PRECURSOR
ENSMUSG00000060260	1.41202	0.000197257	0.00494956	Pwwp2b	PWWP DOMAIN CONTAINING 2B
ENSMUSG00000045679	1.40867	1.14069e-05	0.000490329	Pqlc3	PQ LOOP REPEAT CONTAINING 3 PRECURSOR
ENSMUSG00000038781	1.40772	0.002785	0.0389054	Stap2	SIGNAL TRANSDUCING ADAPTOR 2 STAP 2
ENSMUSG00000097188	1.4068	5.11512e-06	0.00025544	AC025794.1
ENSMUSG00000075585	1.40179	2.15862e-05	0.000837296	6330403L08Rik	UNCHARACTERIZED FRAGMENT
ENSMUSG00000034488	1.4015	7.5222e-05	0.00229082	Edil3	LACTADHERIN PRECURSOR MFGM MILK FAT GLOBULE EGF FACTOR 8 MFG E8 SED1
ENSMUSG00000025277	1.39735	1.67976e-05	0.000675541	Abhd6	MONOACYLGLYCEROL LIPASE ABHD6 EC_3.1.1.23 2 ARACHIDONOYLGLYCEROL HYDROLASE ABHYDROLASE DOMAIN CONTAINING 6
ENSMUSG00000059895	1.39655	5.2273e-05	0.00171761	Ptp4a3	TYROSINE PHOSPHATASE TYPE IVA 1 PRECURSOR EC_3.1.3.48 TYROSINE PHOSPHATASE 4A1 TYROSINE PHOSPHATASE OF REGENERATING LIVER 1 PRL 1
ENSMUSG00000048537	1.39562	0.000694269	0.0134251	Phldb1	PLECKSTRIN HOMOLOGY DOMAIN FAMILY B MEMBER LL5
ENSMUSG00000044348	1.39534	3.57817e-05	0.00127824	Slc25a53	SOLUTE CARRIER FAMILY 25 MEMBER 53 MITOCHONDRIAL CARRIER TRIPLE REPEAT 6
ENSMUSG00000024177	1.39408	3.12295e-05	0.0011326	Nme4	NUCLEOSIDE DIPHOSPHATE KINASE NDK NDP KINASE EC_2.7.4.6
ENSMUSG00000032280	1.39102	0.00353286	0.0464569	Tle3	TRANSDUCIN ENHANCER
ENSMUSG00000037788	1.38971	0.00920787	0.0937838	Vopp1	VESICULAR OVEREXPRESSED IN CANCER PROSURVIVAL 1 PRECURSOR EGFR COAMPLIFIED AND OVEREXPRESSED ECOP
ENSMUSG00000054720	1.3888	0.00060808	0.0121343	Lrrc8c	LEUCINE RICH REPEAT CONTAINING
ENSMUSG00000022419	1.388	0.000161677	0.00426064	Deptor	DEP DOMAIN CONTAINING MTOR INTERACTING DEP DOMAIN CONTAINING 6
ENSMUSG00000048707	1.38681	0.00011149	0.00315245	Tprn	TAPERIN
ENSMUSG00000056204	1.38506	0.000187654	0.00477715	Pgpep1	PYROGLUTAMYL PEPTIDASE 1 EC_3.4.19.3 5 OXOPROLYL PEPTIDASE PYROGLUTAMYL AMINOPEPTIDASE I PAP I PYROGLUTAMYL PEPTIDASE I PGP I PYRROLIDONE CARBOXYLATE PEPTIDASE
ENSMUSG00000032898	1.3848	3.63572e-05	0.00129527	Fbxo21	F BOX ONLY 21
ENSMUSG00000036587	1.38445	0.00176646	0.0277356	Fut7	ALPHA 1 3 FUCOSYLTRANSFERASE FUCOSYLTRANSFERASE FUCOSYLTRANSFERASE FUC FUCT GALACTOSIDE 3 L FUCOSYLTRANSFERASE
ENSMUSG00000039754	1.38427	0.000133572	0.00364067	Alkbh4	ALPHA KETOGLUTARATE DEPENDENT DIOXYGENASE ALKB HOMOLOG 4 EC_1.14.11.- ALKYLATED DNA REPAIR ALKB HOMOLOG 4
ENSMUSG00000058152	1.38389	0.00771441	0.0827319	Chsy3	CHONDROITIN SULFATE SYNTHASE 3 EC_2.4.1.175 EC_2.4.1.- 226 CARBOHYDRATE SYNTHASE 2 CHONDROITIN GLUCURONYLTRANSFERASE 3 CHONDROITIN SYNTHASE 2 CHSY 2 GLUCURONOSYL N ACETYLGALACTOSAMINYL PROTEOGLYCAN 4 BETA N ACETYLGALACTOSAMINYLTRANSFERASE II N ACETYLGALAC
ENSMUSG00000062762	1.38216	5.59207e-06	0.00027562	Ei24	ETOPOSIDE INDUCED 2 4 P53 INDUCED GENE 8
ENSMUSG00000039952	1.38179	0.00172743	0.0272696	Dag1	DYSTROGLYCAN PRECURSOR DYSTROPHIN ASSOCIATED GLYCOPROTEIN 1 [CONTAINS ALPHA DYSTROGLYCAN ALPHA DG ; BETA DYSTROGLYCAN BETA DG ]
ENSMUSG00000021224	1.38175	2.25145e-05	0.00086689	Numb	NUMB
ENSMUSG00000051367	1.38021	0.00900268	0.0923591	Six1	HOMEOBOX SINE OCULIS HOMEOBOX HOMOLOG
ENSMUSG00000056952	1.37804	8.38795e-06	0.000384511	Tatdn2	DEOXYRIBONUCLEASE TATDN2 EC_3.1.21.-
ENSMUSG00000054342	1.37774	0.00261257	0.0372103	Kcnn4	SMALL CONDUCTANCE CALCIUM ACTIVATED POTASSIUM CHANNEL SKCA KCA2
ENSMUSG00000058503	1.37506	2.08732e-06	0.000121088	Fam133b	UNKNOWN
ENSMUSG00000059334	1.37473	0.00614983	0.0697468	Zfp36l3	ZF ZF
ENSMUSG00000028063	1.37441	7.52698e-06	0.000350559	Lmna	LAMIN
ENSMUSG00000049295	1.37418	5.60498e-05	0.00181442	Zfp219	ZINC FINGER 219
ENSMUSG00000075600	1.37389	5.71916e-05	0.00184003	Zc3h3	ZINC FINGER CCCH DOMAIN CONTAINING 3
ENSMUSG00000028977	1.37273	0.00156528	0.0252263	Casz1	ZINC FINGER CASTOR HOMOLOG 1 CASTOR RELATED
ENSMUSG00000026389	1.37153	0.00117559	0.0203467	Steap3	METALLOREDUCTASE EC_1.16.1.- SIX TRANSMEMBRANE EPITHELIAL ANTIGEN OF PROSTATE
ENSMUSG00000078651	1.371	1.60609e-05	0.000651908	Aoc2	AMINE OXIDASE EC_1.4.3.21 AMINE OXIDASE SEMICARBAZIDE SENSITIVE AMINE OXIDASE SSAO
ENSMUSG00000032202	1.37048	0.000345468	0.00774895	Rab27a	RAS RELATED RAB
ENSMUSG00000030315	1.36987	0.000645132	0.0126997	Vgll4	TRANSCRIPTION COFACTOR VESTIGIAL 4 VGL 4
ENSMUSG00000015745	1.36959	0.00384094	0.0495702	Plekho1	PLECKSTRIN HOMOLOGY DOMAIN CONTAINING FAMILY O MEMBER 1 PH DOMAIN CONTAINING FAMILY O MEMBER 1
ENSMUSG00000040339	1.36859	5.47458e-06	0.000271359	Fam102b	UNKNOWN
ENSMUSG00000038244	1.36835	6.85444e-06	0.000325598	Mical2	METHIONINE SULFOXIDE OXIDASE EC_1.14.13.- MOLECULE INTERACTING WITH CASL MICAL
ENSMUSG00000028164	1.36475	1.10382e-05	0.000481369	Manba	PROBABLE BETA MANNOSIDASE A PRECURSOR EC_3.2.1.25 MANNANASE A MANNASE A
ENSMUSG00000046841	1.36416	3.23861e-05	0.00116808	Ckap4	CYTOSKELETON ASSOCIATED 4.63 KDA CYTOSKELETON LINKING MEMBRANE CLIMP 63 P63
ENSMUSG00000029998	1.3615	2.69569e-05	0.000998356	Pcyox1	PRENYLCYSTEINE OXIDASE PRECURSOR
ENSMUSG00000021306	1.36026	0.00728289	0.0792055	Gpr137b	INTEGRAL MEMBRANE TRANSMEMBRANE 7 SUPERFAMILY MEMBER 1
ENSMUSG00000049709	1.35652	2.84795e-06	0.000157878	Nlrp10	NACHT LRR AND PYD DOMAINS CONTAINING 6 ANGIOTENSIN II/VASOPRESSIN RECEPTOR PYRIN CONTAINING APAF1 5
ENSMUSG00000022885	1.35603	0.00507794	0.0607707	St6gal1	BETA GALACTOSIDE ALPHA 2 6 SIALYLTRANSFERASE 2 ALPHA 2 6 ST 2 EC_2.4.99.1 CMP N ACETYLNEURAMINATE BETA GALACTOSAMIDE ALPHA 2 6 SIALYLTRANSFERASE 2 ST6GAL II ST6GALII SIALYLTRANSFERASE 2
ENSMUSG00000020941	1.35571	5.80823e-05	0.00186411	Map3k14	MITOGEN ACTIVATED KINASE KINASE KINASE 14 EC_2.7.11.25 NF KAPPA BETA INDUCING KINASE SERINE/THREONINE KINASE NIK
ENSMUSG00000020262	1.3554	0.00965496	0.0974077	Adarb1	DOUBLE STRANDED RNA SPECIFIC EDITASE EC_3.5.-.- RNA EDITING DEAMINASE RNA EDITING ENZYME DSRNA ADENOSINE DEAMINASE
ENSMUSG00000003344	1.35476	1.54002e-05	0.000628006	Btbd2	BTB/POZ DOMAIN CONTAINING
ENSMUSG00000029587	1.3547	1.96261e-05	0.00077386	Zfp12	ZINC FINGER
ENSMUSG00000044037	1.35158	0.00014756	0.00393609	Als2cl	ALSIN AMYOTROPHIC LATERAL SCLEROSIS 2
ENSMUSG00000062421	1.35076	0.00279304	0.0389555	Arf2	ADP RIBOSYLATION FACTOR
ENSMUSG00000058761	1.34941	1.2308e-05	0.000518535	Rnf169	E3 UBIQUITIN LIGASE RNF169 EC_6.3.2.- RING FINGER 169
ENSMUSG00000029571	1.34844	3.16119e-06	0.000172327	Tmem106b	TRANSMEMBRANE
ENSMUSG00000025950	1.34726	6.86336e-05	0.00213761	Idh1	ISOCITRATE DEHYDROGENASE [NADP] IDH EC_1.1.1.42 IDP NADP + SPECIFIC ICDH OXALOSUCCINATE DECARBOXYLASE
ENSMUSG00000097039	1.34691	8.51853e-06	0.000389137	Pvt1
ENSMUSG00000020937	1.34615	0.000534044	0.011061	Plcd3	1 PHOSPHATIDYLINOSITOL 4 5 BISPHOSPHATE PHOSPHODIESTERASE DELTA EC_3.1.4.11 PHOSPHOINOSITIDE PHOSPHOLIPASE C DELTA PHOSPHOLIPASE C DELTA PLC DELTA
ENSMUSG00000026455	1.34598	5.50573e-06	0.000272388	Klhl12	KELCH
ENSMUSG00000028893	1.34575	0.000810085	0.0152267	Sesn2	SESTRIN
ENSMUSG00000020282	1.3453	0.000533486	0.0110581	Rhbdf1	INACTIVE RHOMBOID 1 IRHOM1 RHOMBOID FAMILY MEMBER 1
ENSMUSG00000022947	1.34306	0.00283812	0.0393748	Cbr3	CARBONYL REDUCTASE [NADPH] 1 EC_1.1.1.184 15 HYDROXYPROSTAGLANDIN DEHYDROGENASE [NADP + ] EC_1.1.1.- 197 20 BETA HYDROXYSTEROID DEHYDROGENASE NADPH DEPENDENT CARBONYL REDUCTASE 1 PROSTAGLANDIN 9 KETOREDUCTASE PROSTAGLANDIN E 2 9 REDUCTASE EC_1.1.-.- 1 189
ENSMUSG00000038797	1.34171	0.000136058	0.00369696	Zscan2	ZINC FINGER AND SCAN DOMAIN CONTAINING 2 ZINC FINGER 29 ZFP 29
ENSMUSG00000025473	1.34159	0.000106178	0.00304271	Adam8	DISINTEGRIN AND METALLOPROTEINASE DOMAIN CONTAINING PRECURSOR ADAM EC_3.4.24.-
ENSMUSG00000001504	1.33985	3.18605e-05	0.0011523	Irx2	IROQUOIS CLASS HOMEODOMAIN IRX IROQUOIS HOMEOBOX
ENSMUSG00000048285	1.33742	0.00563238	0.0654349	Frmd6	FERM DOMAIN CONTAINING
ENSMUSG00000066324	1.33738	4.62868e-06	0.000237048	Impad1	INOSITOL MONOPHOSPHATASE 3 IMP 3 IMPASE 3 EC_3.1.3.25 EC_3.1.3.- 7 GOLGI 3 PRIME PHOSPHOADENOSINE 5 PRIME PHOSPHATE 3 PRIME PHOSPHATASE GOLGI RESIDENT PAP PHOSPHATASE GPAPP INOSITOL MONOPHOSPHATASE DOMAIN CONTAINING 1 INOSITOL 1 OR 4 MONOPHOSPHATASE 3 MYO
ENSMUSG00000043487	1.33735	0.0073909	0.0800152	Acot6	ACYL COENZYME A THIOESTERASE ACYL COA THIOESTERASE EC_3.1.2.2 ACYL COENZYME A THIOESTER HYDROLASE LONG CHAIN ACYL COA
ENSMUSG00000044345	1.33685	1.709e-05	0.000685192	Marveld1	MARVEL DOMAIN CONTAINING 1
ENSMUSG00000030342	1.33637	1.10516e-05	0.000481369	Cd9	ANTIGEN ANTIGEN
ENSMUSG00000028134	1.33594	2.50057e-05	0.00094071	Ptbp2	POLYPYRIMIDINE TRACT BINDING
ENSMUSG00000064345	1.33265	3.0751e-06	0.000168546	mt-Nd2	NADH UBIQUINONE OXIDOREDUCTASE CHAIN 2 EC_1.6.5.3 NADH DEHYDROGENASE SUBUNIT 2
ENSMUSG00000022010	1.33115	0.000167764	0.00437643	Tsc22d1	TSC22 DOMAIN FAMILY 1 REGULATORY TSC 22 TGFB STIMULATED 22 HOMOLOG TRANSFORMING GROWTH FACTOR BETA 1 INDUCED TRANSCRIPT 4
ENSMUSG00000041695	1.33101	0.00384145	0.0495702	Kcnj2	INWARD RECTIFIER POTASSIUM CHANNEL INWARD RECTIFIER K + CHANNEL KIR2 IRK POTASSIUM CHANNEL INWARDLY RECTIFYING SUBFAMILY J MEMBER
ENSMUSG00000027495	1.33057	0.000560609	0.0114484	Fam210b	UNKNOWN
ENSMUSG00000043439	1.33025	0.000178379	0.0045721	E130012A19Rik	UNCHARACTERIZED
ENSMUSG00000040121	1.32704	0.00662401	0.0736279	Rep15	RAB15 EFFECTOR
ENSMUSG00000020326	1.32653	5.56483e-06	0.000274793	Ccng1	CYCLIN
ENSMUSG00000049858	1.3262	4.5538e-05	0.00154845	Suox	SULFITE OXIDASE MITOCHONDRIAL PRECURSOR EC_1.8.3.1
ENSMUSG00000057130	1.32575	7.85533e-06	0.000365203	Txnl4a	SPLICEOSOMAL
ENSMUSG00000089991	1.32446	0.00693234	0.0760556	Gm16332
ENSMUSG00000053411	1.32347	8.56626e-05	0.00254956	Cbx7	CHROMOBOX HOMOLOG 7
ENSMUSG00000038178	1.3234	3.782e-06	0.000199935	Slc43a2	LARGE NEUTRAL AMINO ACIDS TRANSPORTER SMALL SUBUNIT 4 L TYPE AMINO ACID TRANSPORTER 4 SOLUTE CARRIER FAMILY 43 MEMBER 2
ENSMUSG00000024505	1.3213	1.90955e-05	0.000756349	Dtwd2	DTW DOMAIN CONTAINING 2
ENSMUSG00000049130	1.32057	0.000250934	0.00600342	C5ar1	C5A ANAPHYLATOXIN CHEMOTACTIC RECEPTOR 1 C5A ANAPHYLATOXIN CHEMOTACTIC RECEPTOR C5A R C5AR CD88 ANTIGEN
ENSMUSG00000025854	1.31956	0.000775189	0.014772	Fam20c	GLYCOSAMINOGLYCAN XYLOSYLKINASE EC_2.7.1.- XYLOSE KINASE
ENSMUSG00000021792	1.31916	5.00568e-06	0.000252411	Fam213a	REDOX REGULATORY FAM213A PEROXIREDOXIN 2 ACTIVATED IN M CSF STIMULATED MONOCYTES PAMM
ENSMUSG00000030539	1.31912	6.60539e-05	0.0020784	Sema4b	SEMAPHORIN PRECURSOR
ENSMUSG00000026721	1.31853	0.00509637	0.0609357	Rabgap1l	RAB GTPASE ACTIVATING 1
ENSMUSG00000048138	1.31479	0.000376549	0.00833472	Dmrt2	DOUBLESEX AND MAB 3 RELATED TRANSCRIPTION FACTOR 2 DOUBLESEX 2 DSXL 2
ENSMUSG00000030103	1.31382	3.33414e-05	0.00119432	Bhlhe40	CLASS E BASIC HELIX LOOP HELIX CLASS B BASIC HELIX LOOP HELIX ENHANCER OF SPLIT AND HAIRY RELATED SHARP
ENSMUSG00000051098	1.31237	0.00132835	0.0223273	Mblac2	METALLO BETA LACTAMASE DOMAIN CONTAINING 2 EC 3
ENSMUSG00000022856	1.31111	0.000175985	0.00451959	Tmem41a	TRANSMEMBRANE 41A PRECURSOR
ENSMUSG00000023348	1.30947	3.07526e-06	0.000168546	Trip6	ZYXIN
ENSMUSG00000042675	1.30775	0.00109546	0.0192005	Ypel3	YIPPEE
ENSMUSG00000038893	1.30486	8.62203e-05	0.00256034	Fam117a	INDUCED
ENSMUSG00000022848	1.30446	0.000787992	0.0148861	Dirc2	DISRUPTED IN RENAL CARCINOMA 2
ENSMUSG00000078779	1.30418	0.00054354	0.0112133	Zfp59	ZINC FINGER
ENSMUSG00000039137	1.30317	9.48221e-05	0.00278022	Whrn	WHIRLIN
ENSMUSG00000030844	1.30196	8.14976e-06	0.000375562	Rgs10	REGULATOR OF G SIGNALING 10 RGS10
ENSMUSG00000028799	1.30157	0.000107828	0.00307656	Zfp362	ZINC FINGER
ENSMUSG00000096188	1.30125	3.72976e-05	0.00131981	Cmtm4	CKLF MARVEL TRANSMEMBRANE DOMAIN CONTAINING 4 CHEMOKINE FACTOR SUPERFAMILY MEMBER 4
ENSMUSG00000055485	1.29956	0.00272313	0.0383065	Soga1	AMBIGUOUS
ENSMUSG00000020611	1.29821	1.22706e-05	0.000518535	Gna13	GUANINE NUCLEOTIDE BINDING SUBUNIT ALPHA G ALPHA G SUBUNIT ALPHA
ENSMUSG00000058093	1.29448	3.86005e-05	0.00135676	AA987161	ZINC FINGER
ENSMUSG00000073433	1.29087	5.57215e-05	0.00180701	Arhgdig	RHO GDP DISSOCIATION INHIBITOR RHO GDI RHO GDI
ENSMUSG00000039043	1.29086	2.84196e-05	0.00104543	2610034B18Rik	UNKNOWN
ENSMUSG00000029763	1.28991	2.11566e-05	0.000823069	Exoc4	EXOCYST COMPLEX COMPONENT 4 EXOCYST COMPLEX COMPONENT SEC8
ENSMUSG00000070461	1.28979	0.00280299	0.0390113	9230112E08Rik	AMBIGUOUS
ENSMUSG00000021608	1.28869	6.32755e-05	0.0020038	Lpcat1	LYSOPHOSPHATIDYLCHOLINE ACYLTRANSFERASE LPC ACYLTRANSFERASE LPCAT LYSOPC ACYLTRANSFERASE EC_2.3.1.- 1 ACYLGLYCEROPHOSPHOCHOLINE O ACYLTRANSFERASE EC_2.3.1.23 1 ALKYLGLYCEROPHOSPHOCHOLINE O ACETYLTRANSFERASE EC_2.3.-.- 1 67 ACETYL COA:LYSO PLATELET ACTIVAT
ENSMUSG00000002409	1.28655	0.0057229	0.0661641	Dyrk1b	DUAL SPECIFICITY TYROSINE PHOSPHORYLATION REGULATED KINASE EC_2.7.12.1 DUAL SPECIFICITY YAK1 RELATED KINASE MINIBRAIN
ENSMUSG00000035133	1.28601	5.1513e-05	0.00170567	Arhgap5	RHO GTPASE ACTIVATING 35 GLUCOCORTICOID RECEPTOR DNA BINDING FACTOR 1
ENSMUSG00000041607	1.28321	4.07119e-05	0.0014231	Mbp	MYELIN BASIC MBP
ENSMUSG00000025730	1.28258	0.000162333	0.00427129	Rab40c	RAS RELATED RAB SOCS BOX CONTAINING
ENSMUSG00000020483	1.28238	9.33766e-05	0.0027418	Dynll2	DYNEIN LIGHT CHAIN CYTOPLASMIC 8 KDA DYNEIN LIGHT CHAIN DYNEIN LIGHT CHAIN LC8 TYPE
ENSMUSG00000037649	1.2802	0.000127036	0.00349529	H2-DMa	CLASS II HISTOCOMPATIBILITY ANTIGEN ALPHA CHAIN PRECURSOR
ENSMUSG00000039782	1.27805	0.00222931	0.0331563	Cpeb2	CYTOPLASMIC POLYADENYLATION ELEMENT BINDING
ENSMUSG00000062585	1.27718	0.000186448	0.00475107	Cnr2	CANNABINOID RECEPTOR 1 CB R CB1
ENSMUSG00000057842	1.27668	2.58516e-05	0.000965604	Zfp595	ZINC FINGER
ENSMUSG00000021969	1.27644	3.92108e-05	0.00137269	Zdhhc20	PALMITOYLTRANSFERASE EC_2.3.1.- ZINC FINGER DHHC DOMAIN CONTAINING DHHC
ENSMUSG00000027624	1.27573	0.00264891	0.0376461	Epb4.1l1	UNKNOWN
ENSMUSG00000031974	1.27509	9.64002e-05	0.00281482	Abcb10	ATP BINDING CASSETTE SUB FAMILY B MEMBER MITOCHONDRIAL PRECURSOR
ENSMUSG00000026064	1.27504	0.000129672	0.00356033	Ptp4a1	TYROSINE PHOSPHATASE TYPE IVA 1 PRECURSOR EC_3.1.3.48 TYROSINE PHOSPHATASE 4A1 TYROSINE PHOSPHATASE OF REGENERATING LIVER 1 PRL 1
ENSMUSG00000095325	1.27192	0.000428428	0.00926882	Zfp870	ZINC FINGER
ENSMUSG00000063382	1.2699	0.0026679	0.0377931	Bcl9l	B CELL CLL/LYMPHOMA 9 B CELL LYMPHOMA 9 BCL9 PROTEIN BCL9 2
ENSMUSG00000020782	1.26798	0.000642539	0.0126582	Llgl2	LETHAL 2 GIANT LARVAE
ENSMUSG00000002997	1.26575	6.10228e-06	0.000296964	Prkar2b	CAMP DEPENDENT KINASE TYPE II REGULATORY SUBUNIT
ENSMUSG00000024186	1.26502	0.000318688	0.00729172	Rgs11	REGULATOR OF G SIGNALING
ENSMUSG00000015711	1.26393	0.000175211	0.00450854	Prune	PRUNE HOMOLOG EC_3.6.1.1
ENSMUSG00000031749	1.26371	0.000106966	0.0030553	St3gal2	CMP N ACETYLNEURAMINATE BETA GALACTOSAMIDE ALPHA 2 3 SIALYLTRANSFERASE 1 ALPHA 2 3 ST 1 BETA GALACTOSIDE ALPHA 2 3 SIALYLTRANSFERASE 1 EC_2.4.99.4 GAL NAC6S GAL BETA 1 3 GALNAC ALPHA 2 3 SIALYLTRANSFERASE ST3GAL I ST3GALI ST3GALA 1 ST3O SIALYLTRANSFERASE
ENSMUSG00000027087	1.26283	0.000986881	0.0177727	Itgav	INTEGRIN ALPHA PRECURSOR RECEPTOR SUBUNIT ALPHA [CONTAINS INTEGRIN ALPHA HEAVY CHAIN; INTEGRIN ALPHA LIGHT CHAIN]
ENSMUSG00000025025	1.26197	3.77417e-05	0.00133014	Mxi1	MAX 1 MAX 1
ENSMUSG00000029627	1.26091	0.000160943	0.00424556	Zkscan14	ZINC FINGER 394 ZINC FINGER WITH KRAB AND SCAN DOMAINS 14
ENSMUSG00000038936	1.25895	0.00102494	0.0183081	Sccpdh	SACCHAROPINE DEHYDROGENASE OXIDOREDUCTASE EC 1
ENSMUSG00000070047	1.25812	0.000158135	0.00417988	Fat1	PROTOCADHERIN FAT PRECURSOR FAT TUMOR SUPPRESSOR HOMOLOG
ENSMUSG00000015575	1.25714	3.82801e-05	0.0013473	Atp6v0e	V TYPE PROTON ATPASE SUBUNIT E 1 V ATPASE SUBUNIT E 1 VACUOLAR PROTON PUMP SUBUNIT E 1
ENSMUSG00000036155	1.25575	3.25164e-05	0.00117117	Mgat5	ALPHA 1 6 MANNOSYLGLYCOPROTEIN 6 BETA N ACETYLGLUCOSAMINYLTRANSFERASE A EC_2.4.1.155 ALPHA MANNOSIDE BETA 1 6 N ACETYLGLUCOSAMINYLTRANSFERASE GLCNAC T V GNT V MANNOSIDE ACETYLGLUCOSAMINYLTRANSFERASE 5 N ACETYLGLUCOSAMINYL TRANSFERASE V
ENSMUSG00000034429	1.25543	0.000215617	0.00531082	Zfp707	ZINC FINGER 707
ENSMUSG00000026640	1.25442	5.79692e-05	0.00186276	Plxna2	PLEXIN PRECURSOR
ENSMUSG00000024639	1.25394	3.74e-05	0.00132165	Gnaq	GUANINE NUCLEOTIDE BINDING G Q SUBUNIT ALPHA GUANINE NUCLEOTIDE BINDING ALPHA Q
ENSMUSG00000020377	1.25371	0.000105229	0.00302546	Ltc4s	LEUKOTRIENE C4 SYNTHASE LTC4 SYNTHASE EC_4.4.1.20 LEUKOTRIENE C 4 SYNTHASE
ENSMUSG00000030393	1.25343	0.000468212	0.00991678	Zik1	ZINC FINGER
ENSMUSG00000039770	1.25309	0.00372396	0.0484431	Ypel5	YIPPEE 5
ENSMUSG00000024883	1.24979	0.000664948	0.0129993	Rin1	RAS AND RAB INTERACTOR 1 RAS INTERACTION/INTERFERENCE 1
ENSMUSG00000031822	1.24882	0.000482637	0.010173	Gse1	GENETIC SUPPRESSOR ELEMENT 1
ENSMUSG00000022799	1.24784	0.00779006	0.083169	Arhgap31	RHO GTPASE ACTIVATING RHO TYPE GTPASE ACTIVATING GTPASE ACTIVATING
ENSMUSG00000028152	1.2477	8.13973e-05	0.00244793	Tspan5	TETRASPANIN TSPAN TRANSMEMBRANE 4 SUPERFAMILY MEMBER
ENSMUSG00000024118	1.24659	5.94644e-05	0.0019038	1600002H07Rik	UNCHARACTERIZED
ENSMUSG00000025795	1.24624	0.000118546	0.0033033	Rassf3	RAS ASSOCIATION DOMAIN CONTAINING 5 NEW RAS EFFECTOR 1
ENSMUSG00000074916	1.24564	0.000616126	0.0122575	Chst14	CARBOHYDRATE SULFOTRANSFERASE 14 DERMATAN 4 SULFOTRANSFERASE 1 D4ST 1
ENSMUSG00000029416	1.24536	6.82898e-05	0.00213424	Slc15a4	SOLUTE CARRIER FAMILY 15 MEMBER PEPTIDE TRANSPORTER PEPTIDE/HISTIDINE TRANSPORTER
ENSMUSG00000045466	1.24435	0.000235204	0.0056789	Zfp956	AMBIGUOUS
ENSMUSG00000035776	1.24408	0.00017585	0.00451959	Cd99l2	CD99 ANTIGEN 2 PRECURSOR MIC2 1 CD99 ANTIGEN
ENSMUSG00000068134	1.24263	3.30055e-05	0.00118391	Zfp120	ZINC FINGER
ENSMUSG00000024098	1.24239	5.25461e-05	0.00172442	Twsg1	TWISTED GASTRULATION HOMOLOG 1 PRECURSOR
ENSMUSG00000066894	1.24125	0.00238903	0.0349375	Vsig10	V SET AND IMMUNOGLOBULIN DOMAIN CONTAINING 10 PRECURSOR
ENSMUSG00000032350	1.24086	5.61555e-05	0.0018156	Gclc	GLUTAMATE CYSTEINE LIGASE EC_6.3.2.2 GAMMA ECS GAMMA GLUTAMYLCYSTEINE SYNTHETASE
ENSMUSG00000042599	1.23923	0.000117736	0.00328617	Jhdm1d	LYSINE SPECIFIC DEMETHYLASE EC_1.14.11.- JMJC DOMAIN CONTAINING
ENSMUSG00000024246	1.23553	5.47969e-05	0.00178307	Thumpd2	THUMP DOMAIN CONTAINING 2
ENSMUSG00000064363	1.232	0.00385153	0.0496271	mt-Nd4	NADH UBIQUINONE OXIDOREDUCTASE CHAIN 4 EC_1.6.5.3 NADH DEHYDROGENASE SUBUNIT 4
ENSMUSG00000021592	1.2318	0.00022101	0.0053958	Arsk	ARYLSULFATASE K PRECURSOR ASK EC_3.1.6.-
ENSMUSG00000027438	1.23145	0.000811172	0.0152362	Napb	SOLUBLE NSF ATTACHMENT SNAP N ETHYLMALEIMIDE SENSITIVE FACTOR ATTACHMENT
ENSMUSG00000018599	1.23051	0.000705668	0.0136154	Smcr7	MITOCHONDRIAL DYNAMIC MID51 MITOCHONDRIAL DYNAMIC OF 51 KDA HOMOLOG SMITH MAGENIS SYNDROME CHROMOSOMAL REGION CANDIDATE GENE 7
ENSMUSG00000058900	1.22961	0.00403899	0.0514108	Rsl1	ZINC FINGER
ENSMUSG00000096001	1.22853	0.000623951	0.0123663	2610528A11Rik	UNKNOWN
ENSMUSG00000039662	1.22812	5.44561e-05	0.00177599	Icmt	S ISOPRENYLCYSTEINE O METHYLTRANSFERASE EC_2.1.1.100 FARNESYL CYSTEINE CARBOXYL METHYLTRANSFERASE FCMT ISOPRENYLCYSTEINE CARBOXYLMETHYLTRANSFERASE PRENYLATED CARBOXYL METHYLTRANSFERASE PPMT PRENYLCYSTEINE CARBOXYL METHYLTRANSFERASE PCCMT
ENSMUSG00000022843	1.22769	0.0089158	0.0917937	Clcn2	CHLORIDE CHANNEL CLC
ENSMUSG00000049097	1.22769	0.00654252	0.0728456	Ankrd34a	ANKYRIN REPEAT DOMAIN CONTAINING
ENSMUSG00000067653	1.2245	0.00498585	0.0600248	Ankrd23	ANKYRIN REPEAT DOMAIN CONTAINING ANKYRIN REPEAT
ENSMUSG00000038648	1.22448	0.000584944	0.0117892	Creb3l2	CYCLIC AMP RESPONSIVE ELEMENT BINDING 3 2 CAMP RESPONSIVE ELEMENT BINDING 3 2 [CONTAINS PROCESSED CYCLIC AMP RESPONSIVE ELEMENT BINDING 3 2]
ENSMUSG00000053080	1.22409	0.00552878	0.0645994	2700081O15Rik	UNCHARACTERIZED
ENSMUSG00000038975	1.22357	7.63801e-05	0.00231533	Rabggtb	GERANYLGERANYL TRANSFERASE TYPE 2 SUBUNIT BETA EC_2.5.1.60 GERANYLGERANYL TRANSFERASE TYPE II SUBUNIT BETA GGTASE II BETA RAB GERANYL GERANYLTRANSFERASE SUBUNIT BETA RAB GG TRANSFERASE BETA RAB GGTASE BETA RAB GERANYLGERANYLTRANSFERASE SUBUNIT BETA TYPE I
ENSMUSG00000018572	1.22288	0.000334698	0.00755911	Phf23	PHD FINGER 23
ENSMUSG00000062519	1.22143	0.000469215	0.00993001	Zfp398	ZINC FINGER 398 ZINC FINGER DNA BINDING P52/P71
ENSMUSG00000020889	1.22093	0.000799602	0.015062	Nr1d1	NUCLEAR RECEPTOR SUBFAMILY 1 GROUP D MEMBER 1 REV ERBA ALPHA V ERBA RELATED 1 EAR 1
ENSMUSG00000051341	1.21975	0.0001199	0.00333392	Zfp52	ZINC FINGER
ENSMUSG00000024158	1.21898	2.36254e-05	0.000899101	Hagh	HYDROXYACYLGLUTATHIONE HYDROLASE MITOCHONDRIAL PRECURSOR EC_3.1.2.6 GLYOXALASE II GLX II
ENSMUSG00000067370	1.21869	0.00172985	0.0272768	B3galt4	BETA 1 3 GALACTOSYLTRANSFERASE 4 BETA 1 3 GALTASE 4 BETA3GAL T4 BETA3GALT4 B3GAL T4 EC_2.4.1.62 GAL T2 GANGLIOSIDE GALACTOSYLTRANSFERASE UDP GALACTOSE:BETA N ACETYL GALACTOSAMINE BETA 1 3 GALACTOSYLTRANSFERASE
ENSMUSG00000031642	1.21575	0.000406959	0.0088776	Sh3rf1	E3 UBIQUITIN LIGASE SH3RF1 EC_6.3.2.- PLENTY OF SH3S POSH SH3 DOMAIN CONTAINING RING FINGER 1
ENSMUSG00000052102	1.21544	0.000561839	0.0114557	Gnpda1	GLUCOSAMINE 6 PHOSPHATE ISOMERASE EC_3.5.99.6 GLUCOSAMINE 6 PHOSPHATE DEAMINASE GNPDA GLCN6P DEAMINASE
ENSMUSG00000022656	1.21508	0.000281141	0.00657609	Pvrl3	POLIOVIRUS RECEPTOR RELATED 3 PRECURSOR NECTIN 3 CD113 ANTIGEN
ENSMUSG00000020105	1.2138	0.00532117	0.0628214	Lrig3	LEUCINE RICH REPEATS AND IMMUNOGLOBULIN DOMAINS PRECURSOR LIG
ENSMUSG00000040710	1.21341	1.06413e-05	0.0004666	St8sia4	CMP N ACETYLNEURAMINATE POLY ALPHA 2 8 SIALYLTRANSFERASE EC_2.4.99.- ALPHA 2 8 SIALYLTRANSFERASE 8D POLYSIALYLTRANSFERASE 1 SIALYLTRANSFERASE 8D SIAT8 D SIALYLTRANSFERASE ST8SIA IV ST8SIAIV
ENSMUSG00000074212	1.21337	1.39327e-05	0.00057623	Dnajb14	DNAJ HOMOLOG SUBFAMILY MEMBER
ENSMUSG00000034957	1.21247	0.000343364	0.00771494	Cebpa	CCAAT/ENHANCER BINDING ALPHA C/EBP ALPHA
ENSMUSG00000032411	1.21043	0.000144709	0.00387582	Tfdp2	TRANSCRIPTION FACTOR DP
ENSMUSG00000027510	1.21027	0.00980694	0.0986374	Rbm38	RNA BINDING RNA BINDING MOTIF
ENSMUSG00000038732	1.20907	0.000174347	0.00449073	Mboat1	LYSOPHOSPHOLIPID ACYLTRANSFERASE LPLAT EC_2.3.1.- 1 ACYLGLYCEROPHOSPHOETHANOLAMINE O ACYLTRANSFERASE EC_2.3.-.- 1 N7 ACYLTRANSFERASE LYSOPHOSPHATIDYLETHANOLAMINE ACYLTRANSFERASE LPEAT LYSO PE ACYLTRANSFERASE MEMBRANE BOUND O ACYLTRANSFERASE DOMAIN CONTAIN
ENSMUSG00000015143	1.20842	0.000150749	0.00401707	Actn1	ALPHA ACTININ F ACTIN CROSS LINKING NON MUSCLE ALPHA ACTININ
ENSMUSG00000033083	1.20713	0.000249662	0.00598389	Tbc1d4	TBC1 DOMAIN FAMILY MEMBER 4 AKT SUBSTRATE OF 160 KDA AS160
ENSMUSG00000024187	1.20578	0.000162852	0.00427871	Itfg3	ITFG3
ENSMUSG00000058748	1.20413	0.000139517	0.00376355	Zfp958	ZINC FINGER
ENSMUSG00000057229	1.20394	0.000116873	0.00327407	Atp5sl	ATP SYNTHASE SUBUNIT S
ENSMUSG00000024646	1.20339	0.000106474	0.00304788	Cyb5	CYTOCHROME B5
ENSMUSG00000045671	1.20225	0.00120691	0.0207593	Spred2	SPROUTY RELATED EVH1 DOMAIN CONTAINING SPRED
ENSMUSG00000025572	1.20184	0.00772777	0.0828413	Tmc6	TRANSMEMBRANE CHANNEL
ENSMUSG00000037172	1.20009	0.00509209	0.0609123	E330009J07Rik	LCHN
ENSMUSG00000021256	1.19953	0.00284112	0.0393956	Vash1	VASOHIBIN
ENSMUSG00000037509	1.19925	0.00284688	0.0394545	Arhgef4	RHO GUANINE NUCLEOTIDE EXCHANGE FACTOR 9 COLLYBISTIN RAC/CDC42 GUANINE NUCLEOTIDE EXCHANGE FACTOR 9
ENSMUSG00000006638	1.19925	8.32795e-05	0.00250134	Abhd1
ENSMUSG00000018537	1.1985	0.00356099	0.0467097	Pcgf2	POLYCOMB COMPLEX BMI 1 POLYCOMB GROUP RING FINGER 4
ENSMUSG00000027695	1.1984	0.000406643	0.0088776	Pld1	PHOSPHOLIPASE D1 PLD 1 EC_3.1.4.4 CHOLINE PHOSPHATASE 1 PHOSPHATIDYLCHOLINE HYDROLYZING PHOSPHOLIPASE D1
ENSMUSG00000051978	1.19529	0.000230157	0.00557243	Erich1	GLUTAMATE RICH 1
ENSMUSG00000040102	1.19162	0.000454501	0.00972854	Klhl42	KELCH 42 CULLIN 3 BINDING 9 CTB9 KELCH DOMAIN CONTAINING 5
ENSMUSG00000050565	1.19146	6.50252e-05	0.00205187	Tor1aip2	TORSIN 1A INTERACTING 1 ASSOCIATED 1B LAP1B
ENSMUSG00000026879	1.18902	9.52066e-05	0.00278617	Gsn	GELSOLIN
ENSMUSG00000082884	1.18721	7.51694e-05	0.00229082	Gm13339
ENSMUSG00000041241	1.18465	0.000172433	0.00445502	Mul1	MITOCHONDRIAL UBIQUITIN LIGASE ACTIVATOR OF NFKB 1 EC_6.3.2.- E3 UBIQUITIN LIGASE MUL1 GROWTH INHIBITION AND DEATH E3 LIGASE
ENSMUSG00000053664	1.18185	0.00136073	0.0227985	Uck2	UNKNOWN
ENSMUSG00000064210	1.18022	0.000197979	0.00496291	Ano6	ANOCTAMIN TRANSMEMBRANE
ENSMUSG00000018932	1.17946	0.00142799	0.0234754	Map2k3	DUAL SPECIFICITY MITOGEN ACTIVATED KINASE KINASE MAP KINASE KINASE MAPKK EC_2.7.12.2 MAPK/ERK KINASE MEK KINASE KINASE KINASE
ENSMUSG00000021668	1.17606	0.000417766	0.00907559	Polk	DNA POLYMERASE KAPPA EC_2.7.7.7
ENSMUSG00000011267	1.17422	0.000914411	0.0167202	Zfp296	ZINC FINGER 296 ZFP296 ZINC FINGER 342
ENSMUSG00000010047	1.17347	0.00308357	0.0417852	Hyal2	HYALURONIDASE PRECURSOR EC_3.2.1.35 HYALURONOGLUCOSAMINIDASE
ENSMUSG00000032402	1.1731	0.00631414	0.0711794	Smad3	MOTHERS AGAINST DECAPENTAPLEGIC HOMOLOG MAD HOMOLOG MOTHERS AGAINST DPP HOMOLOG SMAD FAMILY MEMBER SMAD
ENSMUSG00000056014	1.17309	0.00178736	0.0279465	A430033K04Rik	AMBIGUOUS
ENSMUSG00000032449	1.17253	0.000325566	0.0074232	Slc25a36	SOLUTE CARRIER FAMILY 25 MEMBER
ENSMUSG00000078429	1.17206	0.00105188	0.0186977	Ctdsp2	CARBOXY TERMINAL DOMAIN RNA POLYMERASE II POLYPEPTIDE A SMALL PHOSPHATASE NUCLEAR LIM INTERACTOR INTERACTING FACTOR NLI INTERACTING FACTOR SMALL C TERMINAL DOMAIN PHOSPHATASE SMALL CTD PHOSPHATASE
ENSMUSG00000021556	1.17185	0.000165621	0.00432977	Golm1	GOLGI MEMBRANE 1 GOLGI MEMBRANE GP73 GOLGI PHOSPHOPROTEIN 2
ENSMUSG00000075000	1.17073	0.000246556	0.00592572	Nrbf2	NUCLEAR RECEPTOR BINDING FACTOR 2 NRBF 2
ENSMUSG00000034105	1.16986	0.000280209	0.00656928	Tldc1	TLD DOMAIN CONTAINING
ENSMUSG00000028124	1.16945	0.000241513	0.00581515	Gclm	GLUTAMATE CYSTEINE LIGASE REGULATORY SUBUNIT GCS LIGHT CHAIN GAMMA ECS REGULATORY SUBUNIT GAMMA GLUTAMYLCYSTEINE SYNTHETASE REGULATORY SUBUNIT GLUTAMATE CYSTEINE LIGASE MODIFIER SUBUNIT
ENSMUSG00000036995	1.16834	0.0011728	0.0203183	Asap3	ARF GAP WITH SH3 DOMAIN ANK REPEAT AND PH DOMAIN CONTAINING 1.130 KDA PHOSPHATIDYLINOSITOL 4 5 BISPHOSPHATE DEPENDENT ARF1 GTPASE ACTIVATING ADP RIBOSYLATION FACTOR DIRECTED GTPASE ACTIVATING 1 ARF GTPASE ACTIVATING 1 DEVELOPMENT AND DIFFERENTIATION ENHAN
ENSMUSG00000038533	1.16824	0.00019914	0.00497773	Cbfa2t2	CBF MTG8
ENSMUSG00000075486	1.16767	0.000144411	0.00387177	Commd6	COMM DOMAIN CONTAINING 6
ENSMUSG00000031007	1.16695	0.000150958	0.00401854	Atp6ap2	RENIN RECEPTOR PRECURSOR ATPASE H + TRANSPORTING LYSOSOMAL ACCESSORY 2 ATPASE H + TRANSPORTING LYSOSOMAL INTERACTING 2 RENIN/PRORENIN RECEPTOR VACUOLAR ATP SYNTHASE MEMBRANE SECTOR ASSOCIATED M8 9 V ATPASE M8 9 SUBUNIT
ENSMUSG00000018199	1.16664	0.000114452	0.00321655	Trove2	60 KDA SS A/RO RIBONUCLEOPROTEIN 60 KDA RO 60 KDA RIBONUCLEOPROTEIN RO RORNP TROVE DOMAIN FAMILY MEMBER 2
ENSMUSG00000051335	1.16518	0.000109098	0.00309929	Gfod1	GLUCOSE FRUCTOSE OXIDOREDUCTASE DOMAIN CONTAINING PRECURSOR EC 1
ENSMUSG00000037280	1.16478	0.00109475	0.0192005	Galnt6	POLYPEPTIDE N ACETYLGALACTOSAMINYLTRANSFERASE EC_2.4.1.41 POLYPEPTIDE GALNAC TRANSFERASE GALNAC PP GANTASE UDP ACETYLGALACTOSAMINYLTRANSFERASE UDP GALNAC:POLYPEPTIDE N ACETYLGALACTOSAMINYLTRANSFERASE
ENSMUSG00000024273	1.16357	0.000452085	0.00969265	2700062C07Rik	UNKNOWN
ENSMUSG00000051890	1.16261	0.000638121	0.0125895	Klhdc1	KELCH DOMAIN CONTAINING
ENSMUSG00000035311	1.16181	0.000128451	0.00353053	Gnptab	N ACETYLGLUCOSAMINE 1 PHOSPHOTRANSFERASE SUBUNITS ALPHA/BETA PRECURSOR EC_2.7.8.17 GLCNAC 1 PHOSPHOTRANSFERASE SUBUNITS ALPHA/BETA STEALTH GNPTAB UDP N ACETYLGLUCOSAMINE 1 PHOSPHOTRANSFERASE SUBUNITS ALPHA/BETA [CONTAINS N ACETYLGLUCOSAMINE 1 PHOSPHOTRANS
ENSMUSG00000004530	1.15812	0.000406923	0.0088776	Coro1c	CORONIN
ENSMUSG00000048027	1.15798	0.000310927	0.00714532	Rgmb	RGM DOMAIN FAMILY MEMBER
ENSMUSG00000044134	1.15764	0.00665548	0.0738114	Fam109a	SESQUIPEDALIAN 1 SES1.27 KDA INOSITOL POLYPHOSPHATE PHOSPHATASE INTERACTING A IPIP27A
ENSMUSG00000025810	1.15698	0.000950298	0.0172322	Nrp1	NEUROPILIN PRECURSOR VASCULAR ENDOTHELIAL CELL GROWTH FACTOR 165 RECEPTOR
ENSMUSG00000040907	1.1541	0.00459426	0.0564508	Atp1a3	SODIUM/POTASSIUM TRANSPORTING ATPASE SUBUNIT ALPHA NA + /K + ATPASE ALPHA SUBUNIT EC_3.6.3.9 SODIUM PUMP SUBUNIT ALPHA
ENSMUSG00000079435	1.15392	0.00395897	0.0507123	Rpl36a	60S RIBOSOMAL L36A
ENSMUSG00000095098	1.15281	0.000321929	0.00735305	Ccdc85b	COILED COIL DOMAIN CONTAINING 85B HEPATITIS DELTA ANTIGEN INTERACTING A DELTA INTERACTING A
ENSMUSG00000020453	1.15017	0.000850723	0.0158061	Patz1	MYC ASSOCIATED ZINC FINGER MAZI PUR 1 PURINE BINDING TRANSCRIPTION FACTOR
ENSMUSG00000042787	1.14928	0.000165387	0.00432796	Exog	NUCLEASE EXOG MITOCHONDRIAL PRECURSOR EC_3.1.30.- ENDONUCLEASE G 1 ENDO G 1
ENSMUSG00000009418	1.14845	9.875e-05	0.00287383	Nav1	NEURON NAVIGATOR PORE MEMBRANE AND/OR FILAMENT INTERACTING STEERIN UNC 53 HOMOLOG UN
ENSMUSG00000014426	1.14685	0.000293394	0.00678403	Map3k4	MITOGEN ACTIVATED KINASE KINASE KINASE 4 EC_2.7.11.25 MAPK/ERK KINASE KINASE 4 MEK KINASE 4 MEKK 4
ENSMUSG00000046185	1.14678	0.00023357	0.00564465	Zfp84	ZINC FINGER
ENSMUSG00000075595	1.14563	0.000778401	0.014785	Zfp652	ZINC FINGER
ENSMUSG00000001642	1.14335	0.0016111	0.0258061	Akr1b3	REDUCTASE ALDO KETO REDUCTASE FAMILY 1 MEMBER
ENSMUSG00000024782	1.14196	0.000256491	0.00610295	Ak3	GTP:AMP PHOSPHOTRANSFERASE AK3 MITOCHONDRIAL EC_2.7.4.10 ADENYLATE KINASE 3 AK 3 ADENYLATE KINASE 3 ALPHA 1
ENSMUSG00000027162	1.14074	5.39553e-05	0.00176422	Lin7c	LIN 7 HOMOLOG LIN MAMMALIAN LIN SEVEN MALS VERTEBRATE LIN 7 HOMOLOG VELI
ENSMUSG00000035847	1.14069	0.000194292	0.0048986	Ids	IDURONATE 2 SULFATASE PRECURSOR EC_3.1.6.13 ALPHA L IDURONATE SULFATE SULFATASE
ENSMUSG00000037820	1.13794	0.000485652	0.0102037	Tgm2	GLUTAMINE GAMMA GLUTAMYLTRANSFERASE EC_2.3.2.13 TRANSGLUTAMINASE TG TGASE TRANSGLUTAMINASE TGASE
ENSMUSG00000050103	1.13606	0.000144004	0.00386483	Agmo	ALKYLGLYCEROL MONOOXYGENASE TRANSMEMBRANE 195
ENSMUSG00000029047	1.13228	0.000275416	0.00648849	Pex10	PEROXISOME BIOGENESIS FACTOR 10 PEROXIN 10 PEROXISOMAL BIOGENESIS FACTOR 10 PEROXISOME ASSEMBLY 10
ENSMUSG00000034173	1.12862	0.00821188	0.0863714	2410018M08Rik	AMBIGUOUS
ENSMUSG00000044636	1.12751	0.00809132	0.0853778	Csrnp2	CYSTEINE/SERINE RICH NUCLEAR CSRNP TGF BETA INDUCED APOPTOSIS TAIP
ENSMUSG00000054364	1.12559	0.00203772	0.0310285	Rhob	GTP BINDING PRECURSOR
ENSMUSG00000037216	1.12523	0.00129547	0.0219719	Lipt1	LIPOYLTRANSFERASE 1 MITOCHONDRIAL PRECURSOR EC_2.3.1.- LIPOATE BIOSYNTHESIS LIPOATE LIGASE LIPOYL LIGASE
ENSMUSG00000059975	1.12503	0.000583596	0.0117711	Zfp74	ZINC FINGER
ENSMUSG00000039943	1.12501	4.11669e-05	0.00143542	Plcb4	1 PHOSPHATIDYLINOSITOL 4 5 BISPHOSPHATE PHOSPHODIESTERASE BETA EC_3.1.4.11 PHOSPHOINOSITIDE PHOSPHOLIPASE C BETA PHOSPHOLIPASE C BETA PLC BETA
ENSMUSG00000026718	1.12497	0.000552803	0.011342	Stam	SIGNAL TRANSDUCING ADAPTER MOLECULE STAM
ENSMUSG00000038214	1.1221	0.0014122	0.0233182	Bend3	BEN DOMAIN CONTAINING 3
ENSMUSG00000024891	1.12166	0.00296345	0.0405968	Slc29a2	EQUILIBRATIVE NUCLEOSIDE TRANSPORTER EQUILIBRATIVE NITROBENZYLMERCAPTOPURINE RIBOSIDE NUCLEOSIDE TRANSPORTER EQUILIBRATIVE NBMPR NUCLEOSIDE TRANSPORTER NUCLEOSIDE TRANSPORTER TYPE SOLUTE CARRIER FAMILY 29 MEMBER
ENSMUSG00000023191	1.12041	0.000268984	0.00637705	Leprel2	PROLYL 3 HYDROXYLASE 1 PRECURSOR EC_1.14.11.7 LEUCINE AND PROLINE ENRICHED PROTEOGLYCAN 1 LEPRECAN 1
ENSMUSG00000039701	1.11902	0.00128215	0.02176	Usp53	INACTIVE UBIQUITIN CARBOXYL TERMINAL HYDROLASE INACTIVE UBIQUITIN SPECIFIC PEPTIDASE
ENSMUSG00000039693	1.11894	0.00553449	0.0646126	Msantd3	MYB/SANT DNA BINDING DOMAIN CONTAINING 3
ENSMUSG00000040410	1.11756	9.93926e-05	0.00288453	Fbxl4	F BOX/LRR REPEAT 4 F BOX AND LEUCINE RICH REPEAT 4
ENSMUSG00000021687	1.11608	0.000460656	0.00982821	Scamp1	SECRETORY CARRIER ASSOCIATED MEMBRANE SECRETORY CARRIER MEMBRANE
ENSMUSG00000075470	1.11432	7.08275e-05	0.00218748	Alg10b	DOL P GLC:GLC 2 MAN 9 GLCNAC 2 PP DOL ALPHA 1 2 GLUCOSYLTRANSFERASE EC_2.4.1.256 ALPHA 1 2 GLUCOSYLTRANSFERASE ALG10 A ALPHA 2 GLUCOSYLTRANSFERASE ALG10 B ASPARAGINE LINKED GLYCOSYLATION 10 HOMOLOG B
ENSMUSG00000059482	1.11404	0.000313296	0.00718716	2610301B20Rik	UNKNOWN
ENSMUSG00000031521	1.11394	0.000778886	0.014785	Aga	N 4 BETA N ACETYLGLUCOSAMINYL L ASPARAGINASE PRECURSOR EC_3.5.1.26 ASPARTYLGLUCOSAMINIDASE AGA GLYCOSYLASPARAGINASE N4 N ACETYL BETA GLUCOSAMINYL L ASPARAGINE AMIDASE [CONTAINS GLYCOSYLASPARAGINASE ALPHA CHAIN; GLYCOSYLASPARAGINASE BETA CHAIN]
ENSMUSG00000062373	1.11388	0.00401612	0.0512192	Tmem65	TRANSMEMBRANE 65
ENSMUSG00000050860	1.1108	0.00144746	0.0237657	Phospho1	PYRIDOXAL PHOSPHATE PHOSPHATASE PHOSPHO2 EC_3.1.3.74
ENSMUSG00000078816	1.10961	0.00140294	0.0232092	Prkcg	KINASE C TYPE PKC EC_2.7.11.13
ENSMUSG00000051185	1.1083	7.60589e-05	0.00231094	Fam174a	MEMBRANE FAM174A PRECURSOR TRANSMEMBRANE 157
ENSMUSG00000047022	1.10599	0.00628393	0.0708998	Mipol1	MIRROR POLYDACTYLY GENE 1
ENSMUSG00000050232	1.10545	0.0025174	0.0364086	Cxcr3	C X C CHEMOKINE RECEPTOR TYPE CXC CXCR HIGH AFFINITY INTERLEUKIN 8 RECEPTOR IL 8R ANTIGEN
ENSMUSG00000033416	1.10306	0.00139133	0.0230753	Gucd1	GUCD1 GUANYLYL CYCLASE DOMAIN CONTAINING 1 LLN4
ENSMUSG00000030148	1.10204	0.000373085	0.00828202	Clec4a2	C TYPE LECTIN DOMAIN FAMILY 4 MEMBER A C TYPE LECTIN SUPERFAMILY MEMBER 6 DENDRITIC CELL
ENSMUSG00000038174	1.10149	0.000154159	0.00409544	Fam126b	HYCCIN DOWN REGULATED BY CTNNB1 A FAM126A
ENSMUSG00000033855	1.10049	0.00194515	0.0298968	Ston1	STONED B
ENSMUSG00000025171	1.10002	0.00126101	0.0214408	Ubtd1	UBIQUITIN DOMAIN CONTAINING
ENSMUSG00000024530	1.09742	0.00321769	0.0430989	Slmo1	SLOWMO HOMOLOG
ENSMUSG00000079442	1.09736	0.00139089	0.0230753	St6galnac4	ALPHA N ACETYLGALACTOSAMINIDE ALPHA 2 6 SIALYLTRANSFERASE EC_2.4.99.- GALNAC ALPHA 2 6 SIALYLTRANSFERASE ST6GALNAC SIALYLTRANSFERASE SIAT7
ENSMUSG00000040751	1.0962	0.000508448	0.0106231	Lat2	LINKER ACTIVATION OF T CELLS FAMILY MEMBER 2 LINKER ACTIVATION OF B CELLS MEMBRANE ASSOCIATED ADAPTER MOLECULE NON T CELL ACTIVATION LINKER WILLIAMS BEUREN SYNDROME CHROMOSOMAL REGION 15
ENSMUSG00000023994	1.09609	0.000330843	0.00749787	Nfya	NUCLEAR TRANSCRIPTION FACTOR Y SUBUNIT ALPHA CAAT BOX DNA BINDING SUBUNIT A NUCLEAR TRANSCRIPTION FACTOR Y SUBUNIT A NF YA
ENSMUSG00000095432	1.09415	0.000779051	0.014785	Zfp748	ZINC FINGER
ENSMUSG00000037703	1.0917	0.00773814	0.0828509	Lzts3	LEUCINE ZIPPER TUMOR SUPPRESSOR
ENSMUSG00000010054	1.09047	0.000622657	0.0123593	Tusc2	TUMOR SUPPRESSOR CANDIDATE 2 FUSION 1 FUS 1 PDGFA ASSOCIATED 2
ENSMUSG00000030060	1.09024	0.000971868	0.0175505	8430410A17Rik	UNKNOWN
ENSMUSG00000095253	1.08954	0.000242251	0.00582758	Zfp799	ZINC FINGER
ENSMUSG00000030688	1.08858	0.00402383	0.0512427	Stard10	PCTP PCTP L START DOMAIN CONTAINING 10 STARD10 SEROLOGICALLY DEFINED COLON CANCER ANTIGEN 28 STAR RELATED LIPID TRANSFER 10
ENSMUSG00000074093	1.08838	0.00296247	0.0405968	Svip	UNKNOWN
ENSMUSG00000027239	1.08773	0.00465473	0.0570869	Mdk	MIDKINE PRECURSOR
ENSMUSG00000032251	1.08738	0.00067086	0.0130688	Irak1bp1	INTERLEUKIN 1 RECEPTOR ASSOCIATED KINASE 1 BINDING 1
ENSMUSG00000052688	1.08701	0.0096381	0.0973126	5430435G22Rik	RAS RELATED RAB
ENSMUSG00000016477	1.08582	0.000582974	0.0117711	E2f3	TRANSCRIPTION FACTOR E2F
ENSMUSG00000081534	1.0851	0.00651002	0.0726998	Slc48a1	HEME TRANSPORTER HRG1 HEME RESPONSIVE GENE 1 HOMOLOG HRG SOLUTE CARRIER FAMILY 48 MEMBER 1
ENSMUSG00000002731	1.08485	0.0010992	0.0192275	Prkra	INTERFERON INDUCIBLE DOUBLE STRANDED RNA DEPENDENT KINASE ACTIVATOR A
ENSMUSG00000019796	1.0843	0.00100483	0.0180217	Lrp11	LOW DENSITY LIPOPROTEIN RECEPTOR RELATED 11 PRECURSOR LRP 11
ENSMUSG00000039105	1.084	0.000509722	0.0106413	Atp6v1g1	V TYPE PROTON ATPASE SUBUNIT G 1 V ATPASE SUBUNIT G 1 V ATPASE 13 KDA SUBUNIT 1 VACUOLAR PROTON PUMP SUBUNIT G 1 VACUOLAR PROTON PUMP SUBUNIT M16
ENSMUSG00000064341	1.08329	0.000179545	0.00459302	mt-Nd1	NADH UBIQUINONE OXIDOREDUCTASE CHAIN 1 EC_1.6.5.3 NADH DEHYDROGENASE SUBUNIT 1
ENSMUSG00000038604	1.08293	0.00223595	0.0332175	Fam65a	FAM65B
ENSMUSG00000052934	1.08204	0.000987739	0.0177759	Fbxo31	F BOX ONLY 31
ENSMUSG00000040128	1.08187	0.00165581	0.0264254	Pnrc1	PROLINE RICH NUCLEAR RECEPTOR COACTIVATOR 1 PROLINE RICH 2
ENSMUSG00000020053	1.07853	0.00130139	0.0220579	Igf1	INSULIN GROWTH FACTOR I PRECURSOR IGF I SOMATOMEDIN
ENSMUSG00000048279	1.07804	0.000199939	0.00499296	Sacs	SACSIN DNAJ HOMOLOG SUBFAMILY C MEMBER 29 DNAJC29
ENSMUSG00000028914	1.07778	0.00436295	0.0543989	Casp9	CASPASE 9 PRECURSOR CASP 9 EC_3.4.22.62 APOPTOTIC PROTEASE MCH 6 APOPTOTIC PROTEASE ACTIVATING FACTOR 3 APAF 3 ICE APOPTOTIC PROTEASE 6 ICE LAP6 [CONTAINS CASPASE 9 SUBUNIT P35; CASPASE 9 SUBUNIT P10]
ENSMUSG00000092193	1.07698	0.00177357	0.0277972	Cd9-ps
ENSMUSG00000026365	1.07695	8.1408e-05	0.00244793	Cfh	COMPLEMENT FACTOR H PRECURSOR H
ENSMUSG00000054708	1.07481	0.00308163	0.0417804	Ankrd24	ANKYRIN REPEAT DOMAIN CONTAINING 24
ENSMUSG00000027300	1.07472	0.000222491	0.00541684	Ubox5	RING FINGER 37 U BOX DOMAIN CONTAINING 5 UBIQUITIN CONJUGATING ENZYME 7 INTERACTING 5
ENSMUSG00000041779	1.07409	0.0076358	0.0820231	Tram2	TRANSLOCATING CHAIN ASSOCIATED MEMBRANE
ENSMUSG00000039164	1.07274	0.000377625	0.00834178	Naif1	NUCLEAR APOPTOSIS INDUCING FACTOR 1
ENSMUSG00000041075	1.07076	0.00503821	0.0604608	Fzd7	FRIZZLED PRECURSOR FZ
ENSMUSG00000050335	1.0703	0.000493159	0.0103449	Lgals3	GALECTIN 3 GAL 3.35 KDA LECTIN CARBOHYDRATE BINDING 35 CBP 35 GALACTOSE SPECIFIC LECTIN 3 IGE BINDING LAMININ BINDING LECTIN L 29 MAC 2 ANTIGEN
ENSMUSG00000022438	1.06924	0.000424336	0.00920812	Parvb	PARVIN
ENSMUSG00000045248	1.06905	0.0013378	0.0224717	Med26	MEDIATOR OF RNA POLYMERASE II TRANSCRIPTION SUBUNIT 26 COFACTOR REQUIRED SP1 TRANSCRIPTIONAL ACTIVATION SUBUNIT 7 CRSP COMPLEX SUBUNIT 7 MEDIATOR COMPLEX SUBUNIT 26
ENSMUSG00000003269	1.06711	0.00137076	0.0228789	Cyth2	CYTOHESIN PH SEC7 AND COILED COIL DOMAIN CONTAINING
ENSMUSG00000020097	1.06693	0.00270738	0.0381599	Sgpl1	SPHINGOSINE 1 PHOSPHATE LYASE 1 S1PL SP LYASE 1 SPL 1 EC_4.1.2.27 SPHINGOSINE 1 PHOSPHATE ALDOLASE
ENSMUSG00000048581	1.06632	0.00475485	0.0580162	E130311K13Rik	UNCHARACTERIZED
ENSMUSG00000027168	1.06585	0.000376669	0.00833472	Pax6	PAIRED BOX PAX
ENSMUSG00000023800	1.06496	0.00105251	0.0186977	Tiam2	T LYMPHOMA INVASION AND METASTASIS INDUCING TIAM
ENSMUSG00000032998	1.06477	0.000653686	0.0128076	Foxj3	FORKHEAD BOX
ENSMUSG00000036867	1.06476	0.00351284	0.0462586	Smad6	MOTHERS AGAINST DECAPENTAPLEGIC HOMOLOG 6 MAD HOMOLOG 6 MOTHERS AGAINST DPP HOMOLOG 6 SMAD FAMILY MEMBER 6 SMAD 6 SMAD6
ENSMUSG00000064360	1.06434	0.00320679	0.0430324	mt-Nd3	NADH UBIQUINONE OXIDOREDUCTASE CHAIN 3 EC_1.6.5.3 NADH DEHYDROGENASE SUBUNIT 3
ENSMUSG00000032425	1.06225	0.00589253	0.0675888	Zfp949	ZINC FINGER
ENSMUSG00000032567	1.05998	0.00194114	0.0298812	Aste1	ASTEROID HOMOLOG 1
ENSMUSG00000026509	1.05948	0.00206785	0.0312694	Capn2	CALPAIN SUBUNIT CALCIUM ACTIVATED NEUTRAL PROTEINASE CANP CALPAIN SUBUNIT
ENSMUSG00000045216	1.05921	0.00419454	0.0529267	Hs6st1	HEPARAN SULFATE 6 O SULFOTRANSFERASE EC_2.8.2.-
ENSMUSG00000040848	1.05858	0.00374435	0.0486283	Sft2d2	VESICLE TRANSPORT SFT2 DOMAIN CONTAINING
ENSMUSG00000042066	1.05788	0.00138363	0.0230405	Tmcc2	TRANSMEMBRANE AND COILED COIL DOMAINS
ENSMUSG00000053819	1.05728	0.00150896	0.0245754	Camk2d	CALCIUM/CALMODULIN DEPENDENT KINASE TYPE II SUBUNIT CAM KINASE II SUBUNIT CAMK II SUBUNIT EC_2.7.11.17
ENSMUSG00000002222	1.0545	0.00022145	0.0053965	Rmnd5a	RMD5 HOMOLOG
ENSMUSG00000004100	1.05365	0.000361844	0.00805426	Ppan	PETER PAN
ENSMUSG00000026335	1.05266	0.000164068	0.00430086	Pam	PEPTIDYL GLYCINE ALPHA AMIDATING MONOOXYGENASE PRECURSOR PAM [INCLUDES PEPTIDYLGLYCINE ALPHA HYDROXYLATING MONOOXYGENASE PHM EC_1.14.17.3 ; PEPTIDYL ALPHA HYDROXYGLYCINE ALPHA AMIDATING LYASE EC_4.3.2.- 5 PEPTIDYLAMIDOGLYCOLATE LYASE PAL ]
ENSMUSG00000010461	1.05219	0.00890608	0.0917589	Eya4	EYES ABSENT HOMOLOG
ENSMUSG00000039987	1.05148	0.000217509	0.00534017	Phtf2	HOMEODOMAIN TRANSCRIPTION FACTOR
ENSMUSG00000050379	1.04937	0.000441406	0.00949476	Sept6	SEPTIN
ENSMUSG00000054931	1.04749	0.0052275	0.0620508	Zkscan4	ZINC FINGER WITH KRAB AND SCAN DOMAINS 3 ZINC FINGER ZINC FINGER 306 ZINC FINGER ZINC FINGER 47 HOMOLOG ZF47 ZFP 47
ENSMUSG00000003518	1.04587	0.00204859	0.0311137	Dusp3	DUAL SPECIFICITY PHOSPHATASE 3 EC_3.1.3.16 EC_3.1.3.- 48 VACCINIA H1 RELATED PHOSPHATASE VHR
ENSMUSG00000030852	1.04537	0.00282191	0.039233	Tacc2	TRANSFORMING ACIDIC COILED COIL CONTAINING
ENSMUSG00000028992	1.0452	0.000699963	0.0135252	Nmnat1	NICOTINAMIDE MONONUCLEOTIDE ADENYLYLTRANSFERASE 1 NMN ADENYLYLTRANSFERASE 1 EC_2.7.7.1 NICOTINATE NUCLEOTIDE ADENYLYLTRANSFERASE 1 NAMN ADENYLYLTRANSFERASE 1 EC_2.7.7.- 18
ENSMUSG00000004558	1.04489	5.17214e-05	0.00170567	Ndrg2	N MYC DOWNSTREAM REGULATED GENE
ENSMUSG00000060510	1.04446	0.000215706	0.00531082	Zfp266	ZINC FINGER
ENSMUSG00000025348	1.04295	0.00920785	0.0937838	Itga7	INTEGRIN ALPHA PRECURSOR CD49 ANTIGEN FAMILY MEMBER VLA ANTIGEN [CONTAINS INTEGRIN ALPHA HEAVY CHAIN; INTEGRIN ALPHA LIGHT CHAIN]
ENSMUSG00000035062	1.04231	0.000333504	0.00753863	Zc4h2	ZINC FINGER DOMAIN CONTAINING HEPATOCELLULAR CARCINOMA ASSOCIATED ANTIGEN 127
ENSMUSG00000039168	1.04197	0.000387362	0.00852098	Dap	DEATH ASSOCIATED 1 DAP 1
ENSMUSG00000037287	1.04089	0.00235554	0.0346214	Tbcel	TUBULIN SPECIFIC CHAPERONE COFACTOR E LEUCINE RICH REPEAT CONTAINING 35
ENSMUSG00000002393	1.03968	0.00228876	0.0339252	Nr2f6	COUP TRANSCRIPTION FACTOR COUP COUP TRANSCRIPTION FACTOR COUP TF NUCLEAR RECEPTOR SUBFAMILY 2 GROUP F MEMBER
ENSMUSG00000070705	1.03745	0.00242124	0.0352511	Eid2b	UNKNOWN
ENSMUSG00000024913	1.03638	0.00055205	0.011342	Lrp5	LOW DENSITY LIPOPROTEIN RECEPTOR RELATED PRECURSOR LRP
ENSMUSG00000066042	1.03609	0.00309326	0.041859	Med18	MEDIATOR OF RNA POLYMERASE II TRANSCRIPTION SUBUNIT 18 MEDIATOR COMPLEX SUBUNIT 18
ENSMUSG00000040415	1.03577	0.00217361	0.0324569	Dtx3	PROBABLE E3 UBIQUITIN LIGASE DTX3 EC_6.3.2.- DELTEX 3 DELTEX3
ENSMUSG00000020009	1.0349	0.00081751	0.0153443	Ifngr1	INTERFERON GAMMA RECEPTOR 1 PRECURSOR IFN GAMMA RECEPTOR 1 IFN GAMMA R1 CD119 ANTIGEN
ENSMUSG00000021356	1.03466	0.00549824	0.0642752	Irf4	INTERFERON REGULATORY FACTOR 8 IRF 8 INTERFERON CONSENSUS SEQUENCE BINDING ICSBP
ENSMUSG00000039316	1.03435	0.000465916	0.00989212	Rftn1	RAFTLIN RAFT LINKING
ENSMUSG00000026728	1.03415	0.000896152	0.0165362	Vim	VIMENTIN
ENSMUSG00000035900	1.03355	0.000903707	0.0165939	Gramd4	GRAM DOMAIN CONTAINING 4
ENSMUSG00000025764	1.03345	0.00842303	0.0880975	Phf17	PHD FINGER
ENSMUSG00000005718	1.03284	0.000872607	0.0161815	Tfap4	TRANSCRIPTION FACTOR AP 4 ACTIVATING ENHANCER BINDING 4 CLASS C BASIC HELIX LOOP HELIX 41 BHLHC41
ENSMUSG00000060681	1.03222	0.000840944	0.0156608	Slc9a6	SODIUM/HYDROGEN EXCHANGER NA + /H + EXCHANGER NHE SOLUTE CARRIER FAMILY 9 MEMBER
ENSMUSG00000049300	1.03033	0.000885823	0.0163802	Prmt6	ARGININE N METHYLTRANSFERASE 6 EC_2.1.1.- HISTONE ARGININE N METHYLTRANSFERASE PRMT6 EC_2.1.1.125
ENSMUSG00000002550	1.03004	0.00239924	0.0350477	Uck1	URIDINE CYTIDINE KINASE 1 UCK 1 EC_2.7.1.48 CYTIDINE MONOPHOSPHOKINASE 1 URIDINE MONOPHOSPHOKINASE 1
ENSMUSG00000034471	1.02898	0.00513787	0.06132	Caskin2	CASKIN 1 CASK INTERACTING 1
ENSMUSG00000039253	1.02846	0.00304895	0.0415306	Fn3krp	KETOSAMINE 3 KINASE EC_2.7.1.- FRUCTOSAMINE 3 KINASE RELATED
ENSMUSG00000053801	1.02735	0.000684241	0.0132605	Grwd1	GLUTAMATE RICH WD REPEAT CONTAINING 1
ENSMUSG00000079685	1.02531	0.00261028	0.0371979	Ulbp1	UL16 BINDING TRANSCRIPT 1 VARIANT
ENSMUSG00000039450	1.02301	0.00205474	0.031143	Dcxr	L XYLULOSE REDUCTASE XR EC_1.1.1.10 DICARBONYL/L XYLULOSE REDUCTASE
ENSMUSG00000033147	1.02239	0.00345139	0.0455914	Slc22a15	SOLUTE CARRIER FAMILY 22 MEMBER 15
ENSMUSG00000028378	1.02076	0.000668773	0.0130475	Ptgr1	PROSTAGLANDIN REDUCTASE 1 PRG 1 EC_1.3.1.- 15 OXOPROSTAGLANDIN 13 REDUCTASE EC_1.3.1.48 NADP DEPENDENT LEUKOTRIENE B4 12 HYDROXYDEHYDROGENASE EC_1.3.-.- 1 74
ENSMUSG00000068221	1.01987	0.00573229	0.0662434	Pdxp	PYRIDOXAL PHOSPHATE PHOSPHATASE PLP PHOSPHATASE EC_3.1.3.3 EC_3.1.3.- 74 CHRONOPHIN
ENSMUSG00000005045	1.01763	0.00229361	0.0339586	Chd5	CHROMODOMAIN HELICASE DNA BINDING EC_3.6.4.12 ATP DEPENDENT HELICASE
ENSMUSG00000066880	1.01679	0.00307314	0.0417733	Zfp617	ZINC FINGER
ENSMUSG00000041957	1.01467	0.0013626	0.0228137	Pkp2	PLAKOPHILIN
ENSMUSG00000070526	1.01434	0.00118252	0.0204395	Peg12	GSK 3 BINDING FRAT2 FREQUENTLY REARRANGED IN ADVANCED T CELL LYMPHOMAS 2 FRAT 2
ENSMUSG00000042724	1.01331	0.00920991	0.0937838	Map3k9	MITOGEN ACTIVATED KINASE KINASE KINASE EC_2.7.11.25 MIXED LINEAGE KINASE
ENSMUSG00000050605	1.01285	0.00442585	0.0549232	Zfp61	ZINC FINGER
ENSMUSG00000064357	1.01246	0.00339952	0.0451107	mt-Atp6	ATP SYNTHASE SUBUNIT A F ATPASE 6
ENSMUSG00000036580	1.01242	0.00232929	0.0343512	Spg20	SPARTIN
ENSMUSG00000042903	1.01175	0.00256191	0.0367817	Foxo4	FORKHEAD BOX O
ENSMUSG00000001630	1.01063	0.0031343	0.0423412	Stk38l	SERINE/THREONINE KINASE EC_2.7.11.1
ENSMUSG00000021775	1.00997	0.0019337	0.0298394	Nr1d2	NUCLEAR RECEPTOR SUBFAMILY 1 GROUP D MEMBER 1 REV ERBA ALPHA V ERBA RELATED 1 EAR 1
ENSMUSG00000035158	1.00883	0.000487594	0.0102363	Mitf	TRANSCRIPTION FACTOR
ENSMUSG00000032440	1.00804	0.000549652	0.0113039	Tgfbr2	TGF BETA RECEPTOR TYPE 2 PRECURSOR TGFR 2 EC_2.7.11.30 TGF BETA TYPE II RECEPTOR TRANSFORMING GROWTH FACTOR BETA RECEPTOR TYPE II TGF BETA RECEPTOR TYPE II TBETAR II
ENSMUSG00000033697	1.00716	0.00292116	0.0401974	Arhgap39	RHO GTPASE ACTIVATING 39
ENSMUSG00000029312	1.00621	0.00273433	0.0384228	Klhl8	KELCH
ENSMUSG00000082791	1.00573	0.00697742	0.0764862	Gm4875
ENSMUSG00000030108	1.00413	0.0017302	0.0272768	Slc6a13	SODIUM AND CHLORIDE DEPENDENT TRANSPORTER SOLUTE CARRIER FAMILY 6 MEMBER
ENSMUSG00000071281	1.00338	0.0010808	0.0190071	Zfp71-rs1	ZINC FINGER
ENSMUSG00000045251	1.00318	0.00145381	0.0238401	Zfp688	ZINC FINGER 688
ENSMUSG00000022811	1.00283	0.000721365	0.0138672	Zfp148	ZINC FINGER 148 TRANSCRIPTION FACTOR ZBP 89 ZINC FINGER DNA BINDING 89
ENSMUSG00000046441	1	0.000906079	0.0166145	Ftsjd1	FTSJ METHYLTRANSFERASE DOMAIN CONTAINING 1 EC_2.1.1.-
ENSMUSG00000030201	0.999852	0.000739592	0.0141863	Lrp6	LOW DENSITY LIPOPROTEIN RECEPTOR RELATED PRECURSOR LRP
ENSMUSG00000032252	0.999668	0.00168913	0.026748	Glce	D GLUCURONYL C5 EPIMERASE EC_5.1.3.17 HEPARAN SULFATE C5 EPIMERASE HSEPI HEPARIN/HEPARAN SULFATE:GLUCURONIC ACID C5 EPIMERASE HEPAROSAN N SULFATE GLUCURONATE 5 EPIMERASE
ENSMUSG00000020422	0.999025	0.000193545	0.00488769	Tns3	TENSIN
ENSMUSG00000029192	0.998638	0.000999591	0.0179523	Tbc1d14	TBC1 DOMAIN FAMILY MEMBER
ENSMUSG00000005534	0.998208	0.00397346	0.0508234	Insr	INSULIN RECEPTOR PRECURSOR EC_2.7.10.1 [CONTAINS INSULIN RECEPTOR ALPHA CHAIN; INSULIN RECEPTOR BETA CHAIN]
ENSMUSG00000048490	0.997398	0.00119052	0.0205508	Nrip1	NUCLEAR RECEPTOR INTERACTING 1 NUCLEAR FACTOR RIP140 RECEPTOR INTERACTING 140
ENSMUSG00000031875	0.996239	0.0042938	0.0538058	Cmtm3	CKLF MARVEL TRANSMEMBRANE DOMAIN CONTAINING 3 CHEMOKINE FACTOR SUPERFAMILY MEMBER 3
ENSMUSG00000034271	0.994411	0.00524465	0.0621435	Jdp2	JUN DIMERIZATION 2
ENSMUSG00000070348	0.993731	0.00167313	0.0265403	Ccnd1	G1/S SPECIFIC CYCLIN
ENSMUSG00000061759	0.992415	0.000932546	0.0170044	1700052N19Rik	HOMOLOG
ENSMUSG00000037679	0.992392	0.000463067	0.00984759	Inf2	INVERTED FORMIN 2
ENSMUSG00000025351	0.991512	0.00602323	0.0686674	Cd63	CD63 ANTIGEN CD63 ANTIGEN
ENSMUSG00000052656	0.991025	0.0037674	0.0488285	Rnf103	E3 UBIQUITIN LIGASE RNF103 EC_6.3.2.- KF 1 1 RING FINGER 103 ZINC FINGER 103 ZFP 103
ENSMUSG00000038002	0.989412	0.00317524	0.0427842	Cramp1l	CRAMPED HEMATOLOGICAL AND NEUROLOGICAL EXPRESSED 1
ENSMUSG00000029458	0.988855	0.0011437	0.019913	Brap	BRCA1 ASSOCIATED EC_6.3.2.- BRAP2 IMPEDES MITOGENIC SIGNAL PROPAGATION IMP
ENSMUSG00000021226	0.988507	0.00353083	0.0464535	Acot2	ACYL COENZYME A THIOESTERASE ACYL COA THIOESTERASE EC_3.1.2.2 ACYL COENZYME A THIOESTER HYDROLASE LONG CHAIN ACYL COA
ENSMUSG00000036103	0.988106	0.00104803	0.0186561	Colec12	COLLECTIN 12 COLLECTIN PLACENTA 1 CL P1 SCAVENGER RECEPTOR
ENSMUSG00000026207	0.986895	0.00478254	0.0582728	Speg	STRIATED MUSCLE KINASE EC_2.7.11.1 AORTIC PREFERENTIALLY EXPRESSED 1 APEG 1
ENSMUSG00000029050	0.985443	0.00282651	0.039276	Ski	SKI ONCOGENE PROTO ONCOGENE C SKI
ENSMUSG00000023147	0.983604	0.00208601	0.0314714	Wrb	TAIL ANCHORED INSERTION RECEPTOR WRB TRYPTOPHAN RICH BASIC WRB
ENSMUSG00000036620	0.982378	0.00378588	0.0489957	Mgat4b	ALPHA 1 3 MANNOSYL GLYCOPROTEIN 4 BETA N ACETYLGLUCOSAMINYLTRANSFERASE A EC_2.4.1.145 N GLYCOSYL OLIGOSACCHARIDE GLYCOPROTEIN N ACETYLGLUCOSAMINYLTRANSFERASE IVA GLCNAC T IVA GNT IVA N ACETYLGLUCOSAMINYLTRANSFERASE IVA UDP N ACETYLGLUCOSAMINE: ALPHA 1 3 D
ENSMUSG00000097392	0.980575	0.00255707	0.0367592	AC123687.1
ENSMUSG00000022401	0.979099	0.000945324	0.0171709	Xpnpep3	PROBABLE XAA PRO AMINOPEPTIDASE 3 X PRO AMINOPEPTIDASE 3 EC_3.4.11.9 AMINOPEPTIDASE P3 APP3
ENSMUSG00000069833	0.978539	0.00725812	0.0791002	Ahnak	NEUROBLAST DIFFERENTIATION ASSOCIATED AHNAK DESMOYOKIN
ENSMUSG00000025078	0.977705	0.00240766	0.0351315	Nhlrc2	NHL REPEAT CONTAINING 2
ENSMUSG00000029729	0.977635	0.000685389	0.013273	Zkscan1	ZINC FINGER WITH KRAB AND SCAN DOMAINS 1
ENSMUSG00000033985	0.976664	0.00422064	0.0530789	Tesk2	DUAL SPECIFICITY TESTIS SPECIFIC KINASE EC_2.7.12.1 TESTICULAR KINASE
ENSMUSG00000020605	0.975996	0.00652594	0.0728451	Hs1bp3	HCLS1 BINDING 3 HS1 BINDING 3 HSP1BP 3
ENSMUSG00000031955	0.975712	0.00866246	0.0899558	Bcar1	ENHANCER OF FILAMENTATION 1 CRK ASSOCIATED SUBSTRATE RELATED CAS L NEURAL PRECURSOR CELL EXPRESSED DEVELOPMENTALLY DOWN REGULATED 9 NEDD 9 P105
ENSMUSG00000022451	0.974838	0.00211301	0.0318604	Twf1	TWINFILIN
ENSMUSG00000021185	0.974151	0.00094311	0.0171709	9030617O03Rik	MITOCHONDRIAL PRECURSOR
ENSMUSG00000038025	0.973916	0.0027098	0.0381599	Phf2	LYSINE SPECIFIC DEMETHYLASE EC_1.14.11.- JMJC DOMAIN CONTAINING
ENSMUSG00000049339	0.972577	0.00178719	0.0279465	Fam134a	UNKNOWN
ENSMUSG00000048807	0.97177	0.00940558	0.0954796	Slc35e4	SOLUTE CARRIER FAMILY 35 MEMBER E4
ENSMUSG00000075122	0.971105	0.00583175	0.0672151	Cd80	T LYMPHOCYTE ACTIVATION ANTIGEN CD80 PRECURSOR ACTIVATION B7 1 ANTIGEN CD80 ANTIGEN
ENSMUSG00000043252	0.971089	0.00106179	0.0188116	Tmem64	TRANSMEMBRANE 64
ENSMUSG00000030609	0.97061	0.000797751	0.015038	Aen	APOPTOSIS ENHANCING NUCLEASE EC_3.1.-.- INTERFERON STIMULATED 20 KDA EXONUCLEASE 1
ENSMUSG00000032261	0.969203	0.00225589	0.0334569	Sh3bgrl2	SH3 DOMAIN BINDING GLUTAMIC ACID RICH 2
ENSMUSG00000020385	0.968002	0.000945609	0.0171709	Clk4	DUAL SPECIFICITY KINASE EC_2.7.12.1 CDC KINASE
ENSMUSG00000044456	0.96786	0.000968778	0.0175068	Rin3	RAS AND RAB INTERACTOR 3 RAS INTERACTION/INTERFERENCE 3
ENSMUSG00000008435	0.966805	0.00139816	0.0231446	Rdh13	RETINOL DEHYDROGENASE
ENSMUSG00000042460	0.966084	0.00142778	0.0234754	C1galt1	GLYCOPROTEIN N ACETYLGALACTOSAMINE 3 BETA GALACTOSYLTRANSFERASE 1 EC_2.4.1.122 CORE 1 O GLYCAN T SYNTHASE CORE 1 UDP GALACTOSE:N ACETYLGALACTOSAMINE ALPHA R BETA 1 3 GALACTOSYLTRANSFERASE 1 CORE 1 BETA1 3 GALACTOSYLTRANSFERASE 1 C1GALT1 CORE 1 BETA3 GAL T
ENSMUSG00000040713	0.964927	0.00169997	0.0268848	Creg1	CREG1 PRECURSOR CELLULAR REPRESSOR OF E1A STIMULATED GENES 1
ENSMUSG00000083219	0.96267	0.00479085	0.0583469	Gm11410
ENSMUSG00000031996	0.962423	0.00134444	0.0225545	Aplp2	AMYLOID BETA A4 PRECURSOR ABPP APP ALZHEIMER DISEASE AMYLOID A4 HOMOLOG [CONTAINS N APP; SOLUBLE APP ALPHA S APP ALPHA ; SOLUBLE APP BETA S APP BETA ; BETA AMYLOID 42 BETA APP42 ; BETA AMYLOID 40 BETA APP40 ; C83; P3 42 ; P3 40 ; C80; GAMMA SECRETASE C TE
ENSMUSG00000053870	0.961538	0.00090809	0.0166336	Fpgt	FUCOSE 1 PHOSPHATE GUANYLYLTRANSFERASE EC_2.7.7.30 GDP L FUCOSE DIPHOSPHORYLASE GDP L FUCOSE PYROPHOSPHORYLASE
ENSMUSG00000033478	0.959469	0.00456141	0.0562052	Fam160b1	UNKNOWN
ENSMUSG00000039953	0.95832	0.00141181	0.0233182	Clstn1	CALSYNTENIN PRECURSOR ALCADEIN ALC
ENSMUSG00000042292	0.958137	0.00343508	0.045473	Mkl1	MKL/MYOCARDIN MEGAKARYOBLASTIC LEUKEMIA MYOCARDIN RELATED TRANSCRIPTION FACTOR MRTF
ENSMUSG00000046186	0.95681	0.000580978	0.0117545	Cd109	CD109 ANTIGEN PRECURSOR ALPHA 2 MACROGLOBULIN CD109 ANTIGEN
ENSMUSG00000015127	0.956459	0.0062137	0.0703192	Unkl	RING FINGER UNKEMPT ZINC FINGER CCCH DOMAIN CONTAINING 5
ENSMUSG00000025534	0.955536	0.00288436	0.0398057	Gusb	BETA GLUCURONIDASE PRECURSOR EC_3.2.1.31
ENSMUSG00000031622	0.954958	0.00237093	0.0348281	Sin3b	PAIRED AMPHIPATHIC HELIX SIN3B HISTONE DEACETYLASE COMPLEX SUBUNIT SIN3B TRANSCRIPTIONAL COREPRESSOR SIN3B
ENSMUSG00000002257	0.954491	0.00613163	0.0696006	Def6	DIFFERENTIALLY EXPRESSED IN FDCP 6
ENSMUSG00000021271	0.952442	0.00372455	0.0484431	Zfp839	ZINC FINGER 839 RENAL CARCINOMA ANTIGEN NY REN 50
ENSMUSG00000022884	0.951918	0.00100585	0.0180276	Eif4a2	ATP DEPENDENT RNA HELICASE EIF4A EC_3.6.4.13 EUKARYOTIC INITIATION FACTOR 4A EIF 4A TRANSLATION INITIATION FACTOR 1
ENSMUSG00000038650	0.951877	0.00456579	0.0562064	Rnh1	RIBONUCLEASE INHIBITOR RIBONUCLEASE/ANGIOGENIN INHIBITOR 1
ENSMUSG00000078584	0.951556	0.00325197	0.0434828	AU022252	UNCHARACTERIZED
ENSMUSG00000057691	0.950963	0.00283465	0.0393475	Zfp746	ZINC FINGER 746
ENSMUSG00000026315	0.949937	0.000909	0.0166336	Serpinb8	SERPIN
ENSMUSG00000020661	0.948932	0.00922076	0.0938578	Dnmt3a	DNA CYTOSINE 5 METHYLTRANSFERASE EC_2.1.1.37 DNA METHYLTRANSFERASE DNA MTASE M
ENSMUSG00000022969	0.947342	0.0078367	0.083531	Il10rb	INTERLEUKIN 10 RECEPTOR SUBUNIT BETA PRECURSOR IL 10 RECEPTOR SUBUNIT BETA IL 10R SUBUNIT BETA IL 10RB CYTOKINE RECEPTOR CLASS II MEMBER 4 CYTOKINE RECEPTOR FAMILY 2 MEMBER 4 CRF2 4 INTERLEUKIN 10 RECEPTOR SUBUNIT 2 IL 10R SUBUNIT 2 IL 10R2 CDW210B ANTIGE
ENSMUSG00000052364	0.944823	0.00277308	0.0387977	B630019K06Rik	AMBIGUOUS
ENSMUSG00000046603	0.944537	0.001524	0.0247895	Tcaim	T CELL ACTIVATION INHIBITOR MITOCHONDRIAL TOLERANCE ASSOCIATED GENE 1 TOAG 1
ENSMUSG00000041684	0.944294	0.00154295	0.0249819	Bivm	DNA REPAIR COMPLEMENTING XP G CELLS EC_3.1.-.- XERODERMA PIGMENTOSUM GROUP G COMPLEMENTING
ENSMUSG00000065979	0.944164	0.00108546	0.0190635	Cpped1	CALCINEURIN PHOSPHOESTERASE DOMAIN CONTAINING 1 EC_3.1.-.-
ENSMUSG00000053091	0.94405	0.00398937	0.0509523	Lins	LINES HOMOLOG LINES HOMOLOG WNT SIGNALING MOLECULE LINES HOMOLOG
ENSMUSG00000042742	0.942373	0.00252377	0.0364484	B630005N14Rik	UNKNOWN
ENSMUSG00000025912	0.942125	0.00532608	0.0628511	Mybl1	MYB RELATED MYB MYB
ENSMUSG00000022020	0.941761	0.00286784	0.039724	Naa16	N ALPHA ACETYLTRANSFERASE NATA AUXILIARY SUBUNIT NMDA RECEPTOR REGULATED 1
ENSMUSG00000005204	0.941707	0.00326032	0.0435501	Senp3	SENTRIN SPECIFIC PROTEASE 3 EC_3.4.22.68 SUMO 1 SPECIFIC PROTEASE 3 SENTRIN/SUMO SPECIFIC PROTEASE SENP3
ENSMUSG00000047379	0.940419	0.00461876	0.0567127	B3gnt1	N ACETYLLACTOSAMINIDE BETA 1 3 N ACETYLGLUCOSAMINYLTRANSFERASE EC_2.4.1.149 I BETA 1 3 N ACETYLGLUCOSAMINYLTRANSFERASE IGNT POLY N ACETYLLACTOSAMINE EXTENSION ENZYME UDP GLCNAC:BETAGAL BETA 1 3 N ACETYLGLUCOSAMINYLTRANSFERASE 1
ENSMUSG00000039031	0.939147	0.00235448	0.0346214	Arhgap18	RHO GTPASE ACTIVATING RHO TYPE GTPASE ACTIVATING
ENSMUSG00000021716	0.937931	0.000828436	0.0154939	Srek1ip1	SREK1IP1 SFRS12 INTERACTING 1 SREK1 INTERACTING 1
ENSMUSG00000069184	0.9379	0.00982045	0.0986976	Zfp72	ZINC FINGER
ENSMUSG00000028613	0.937461	0.0080064	0.0847199	Lrp8	VERY LOW DENSITY LIPOPROTEIN RECEPTOR PRECURSOR VLDL RECEPTOR VLDL R
ENSMUSG00000041775	0.936512	0.0037033	0.0482146	Mapk1ip1	MAPK INTERACTING AND SPINDLE STABILIZING MITOGEN ACTIVATED KINASE 1 INTERACTING 1
ENSMUSG00000031774	0.936492	0.00237553	0.0348371	Fam192a	FAM192A NEFA INTERACTING NUCLEAR NIP30
ENSMUSG00000021508	0.935552	0.00115479	0.0200662	Cxcl14	C X C MOTIF CHEMOKINE 14 PRECURSOR CHEMOKINE BRAK MIP 2G SMALL INDUCIBLE CYTOKINE B14
ENSMUSG00000039202	0.935474	0.00449597	0.0555817	Abhd2	ABHYDROLASE DOMAIN CONTAINING 2 EC_3.1.1.-
ENSMUSG00000030245	0.932955	0.0029663	0.0405968	Golt1b	VESICLE TRANSPORT GOT1B GOLGI TRANSPORT 1 HOMOLOG B
ENSMUSG00000031995	0.931095	0.00197688	0.0303134	St14	TRANSMEMBRANE PROTEASE SERINE EC_3.4.21.- MATRIPTASE
ENSMUSG00000036894	0.931057	0.00529707	0.0626215	Rap2b	RAS RELATED RAP PRECURSOR
ENSMUSG00000024869	0.93057	0.00340942	0.0451964	Nudt8	NUCLEOSIDE DIPHOSPHATE LINKED MOIETY X MOTIF 8 MITOCHONDRIAL PRECURSOR NUDIX MOTIF 8 EC_3.6.1.-
ENSMUSG00000030386	0.929093	0.00443013	0.0549232	Zfp606	ZINC FINGER
ENSMUSG00000015759	0.928075	0.00586438	0.0673838	Cnih	CORNICHON HOMOLOG
ENSMUSG00000042197	0.927821	0.00279875	0.0389845	Zfp451	ZINC FINGER 451
ENSMUSG00000047036	0.925535	0.00123919	0.021168	Zfp445	ZINC FINGER 445
ENSMUSG00000030104	0.92329	0.00203313	0.0309765	Edem1	ER DEGRADATION ENHANCING ALPHA MANNOSIDASE 1
ENSMUSG00000048997	0.922215	0.00260069	0.0371217	Atxn7l2	ATAXIN 7 2
ENSMUSG00000030523	0.920846	0.00591317	0.0677438	Trpm1	TRANSIENT RECEPTOR POTENTIAL CATION CHANNEL SUBFAMILY M MEMBER LONG TRANSIENT RECEPTOR POTENTIAL CHANNEL
ENSMUSG00000026411	0.920625	0.00277926	0.038846	Tmem9	TRANSMEMBRANE PRECURSOR
ENSMUSG00000010554	0.918936	0.000840736	0.0156608	Mettl16	METHYLTRANSFERASE 16 EC_2.1.1.- METHYLTRANSFERASE 10 DOMAIN CONTAINING
ENSMUSG00000062995	0.918442	0.00237902	0.0348688	Ica1	ISLET CELL AUTOANTIGEN 1.69 KDA ISLET CELL AUTOANTIGEN ICA69 ISLET CELL AUTOANTIGEN P69 ICAP69 P69
ENSMUSG00000029249	0.915317	0.00172087	0.0271824	Rest	RE1 SILENCING TRANSCRIPTION FACTOR NEURAL RESTRICTIVE SILENCER FACTOR
ENSMUSG00000031578	0.914713	0.000819913	0.0153674	Mak16	MAK16
ENSMUSG00000056941	0.914663	0.00378727	0.0489957	Commd7	COMM DOMAIN CONTAINING 7
ENSMUSG00000037339	0.91443	0.00180026	0.0280979	Fam53a	FAM53A DORSAL NEURAL TUBE NUCLEAR
ENSMUSG00000035168	0.91237	0.00635674	0.0715139	Tanc1	TETRATRICOPEPTIDE REPEAT ANKYRIN REPEAT AND COILED COIL DOMAIN CONTAINING
ENSMUSG00000022629	0.912142	0.00141045	0.0233182	Kif21a	KINESIN
ENSMUSG00000046862	0.910094	0.00549269	0.0642676	Pramef8	PRAME FAMILY MEMBER
ENSMUSG00000056666	0.909162	0.00136975	0.0228766	Retsat	ALL TRANS RETINOL 13 14 REDUCTASE PRECURSOR EC_1.3.99.23 ALL TRANS 13 14 DIHYDRORETINOL SATURASE RETSAT PPAR ALPHA REGULATED AND STARVATION INDUCED GENE
ENSMUSG00000037652	0.90895	0.00229865	0.0339949	Phc3	POLYHOMEOTIC 3
ENSMUSG00000051390	0.906517	0.00785191	0.0835911	Zbtb22	ZINC FINGER AND BTB DOMAIN CONTAINING 22 ZINC FINGER 297
ENSMUSG00000026135	0.906483	0.00443963	0.0550149	Zfp142	ZINC FINGER 142
ENSMUSG00000071708	0.905493	0.00216254	0.0323468	Sms	SPERMINE SYNTHASE SPMSY EC_2.5.1.22 SPERMIDINE AMINOPROPYLTRANSFERASE
ENSMUSG00000035545	0.90462	0.00412635	0.052345	Leng8	LEUKOCYTE RECEPTOR CLUSTER MEMBER 8
ENSMUSG00000026123	0.90374	0.00726293	0.0791198	Plekhb2	PLECKSTRIN HOMOLOGY DOMAIN CONTAINING FAMILY B MEMBER 2 PH DOMAIN CONTAINING FAMILY B MEMBER 2 EVECTIN 2
ENSMUSG00000027088	0.903345	0.00502493	0.0603843	Phospho2	PYRIDOXAL PHOSPHATE PHOSPHATASE PHOSPHO2 EC_3.1.3.74
ENSMUSG00000042997	0.902103	0.00267241	0.0378345	Nhlrc3	NHL REPEAT CONTAINING 3 PRECURSOR
ENSMUSG00000021215	0.901615	0.00190511	0.0294366	Net1	RHO GUANINE NUCLEOTIDE EXCHANGE FACTOR
ENSMUSG00000026358	0.901219	0.000889669	0.0164282	Rgs1	REGULATOR OF G SIGNALING 1 RGS1
ENSMUSG00000063193	0.89971	0.00590878	0.0677438	Cd300lb	CMRF35 MOLECULE 7 PRECURSOR CLM 7 CD300 ANTIGEN FAMILY MEMBER B IMMUNE RECEPTOR EXPRESSED ON MYELOID CELLS 3 IREM 3 LEUKOCYTE MONO IG RECEPTOR 5 CD300B ANTIGEN
ENSMUSG00000032667	0.898034	0.0025006	0.0362166	Pon2	SERUM PARAOXONASE/ARYLESTERASE 2 PON 2 EC_3.1.1.2 AROMATIC ESTERASE 2 A ESTERASE 2 SERUM ARYLDIALKYLPHOSPHATASE 2
ENSMUSG00000049086	0.89696	0.00168928	0.026748	Bmyc	MYC PROTO ONCOGENE PROTO ONCOGENE C MYC TRANSCRIPTION FACTOR P64
ENSMUSG00000024381	0.895706	0.00287794	0.039781	Bin1	BRIDGING INTEGRATOR
ENSMUSG00000026869	0.895334	0.00913718	0.0934058	Psmd5	26S PROTEASOME NON ATPASE REGULATORY SUBUNIT 5 26S PROTEASE SUBUNIT S5 BASIC 26S PROTEASOME SUBUNIT S5B
ENSMUSG00000069729	0.894572	0.00279702	0.0389845	Arid1b	AT RICH INTERACTIVE DOMAIN CONTAINING 1A ARID DOMAIN CONTAINING 1A BRG1 ASSOCIATED FACTOR 250 BAF250 BRG1 ASSOCIATED FACTOR 250A BAF250A OSA HOMOLOG 1 SWI SWI/SNF COMPLEX P270 SWI/SNF RELATED MATRIX ASSOCIATED ACTIN DEPENDENT REGULATOR OF CHROMATIN SUBFA
ENSMUSG00000027227	0.894494	0.00516432	0.0614399	Sord	SORBITOL DEHYDROGENASE EC_1.1.1.14 L IDITOL 2 DEHYDROGENASE
ENSMUSG00000008429	0.894037	0.00325879	0.0435501	Herpud2	HOMOCYSTEINE RESPONSIVE ENDOPLASMIC RETICULUM RESIDENT UBIQUITIN DOMAIN MEMBER
ENSMUSG00000046791	0.892817	0.00626584	0.070787	2410016O06Rik	BIFUNCTIONAL LYSINE SPECIFIC DEMETHYLASE AND HISTIDYL HYDROXYLASE NO66 EC_1.14.11.- HISTONE LYSINE DEMETHYLASE NO66
ENSMUSG00000022617	0.892751	0.00799041	0.0845848	Chkb	CHOLINE/ETHANOLAMINE KINASE CHOLINE KINASE BETA CK CKB EC_2.7.1.32 ETHANOLAMINE KINASE EK EC_2.7.1.- 82 CHOLINE/ETHANOLAMINE KINASE BETA CKEKB
ENSMUSG00000015757	0.891922	0.00310083	0.0419324	Ppil4	PEPTIDYL PROLYL CIS TRANS ISOMERASE 4 PPIASE EC_5.2.1.8 ROTAMASE
ENSMUSG00000036197	0.890715	0.00275552	0.038617	Gxylt1	GLUCOSIDE XYLOSYLTRANSFERASE EC_2.4.2.- N2 GLYCOSYLTRANSFERASE 8 DOMAIN CONTAINING
ENSMUSG00000042148	0.890554	0.00204856	0.0311137	Cox10	PROTOHEME IX FARNESYLTRANSFERASE MITOCHONDRIAL PRECURSOR EC_2.5.1.- HEME O SYNTHASE
ENSMUSG00000026566	0.890003	0.00642033	0.0720049	Mpzl1	MYELIN ZERO 1 PRECURSOR
ENSMUSG00000090083	0.889974	0.0054261	0.0638304	Rnf8	E3 UBIQUITIN LIGASE RNF8 EC_6.3.2.- RING FINGER 8
ENSMUSG00000040151	0.889742	0.00318135	0.0428386	Hs2st1	HEPARAN SULFATE 2 O SULFOTRANSFERASE 1 2 O SULFOTRANSFERASE 2OST EC_2.8.2.-
ENSMUSG00000027324	0.888719	0.0050692	0.0607216	Rpusd2	TRNA PSEUDOURIDINE SYNTHASE PSEUDOURIDINE SYNTHASE PSEUDOURIDYLATE SYNTHASE TRNA
ENSMUSG00000042688	0.887921	0.00953257	0.0963955	Mapk6	MITOGEN ACTIVATED KINASE MAP KINASE MAPK EC_2.7.11.24 EXTRACELLULAR SIGNAL REGULATED KINASE ERK
ENSMUSG00000006019	0.886934	0.000668134	0.0130448	Dhx34	PROBABLE ATP DEPENDENT RNA HELICASE DHX34 EC_3.6.4.13 DEAH BOX 34
ENSMUSG00000040842	0.886638	0.00421703	0.0530589	Szrd1	SUZ DOMAIN CONTAINING 1
ENSMUSG00000021996	0.886495	0.00897143	0.0921986	Esd	S FORMYLGLUTATHIONE HYDROLASE FGH EC_3.1.2.12 ESTERASE D
ENSMUSG00000004896	0.885535	0.00378758	0.0489957	Rrnad1	RRNAD1
ENSMUSG00000055809	0.883467	0.00339284	0.0450449	Dnaaf3	DYNEIN ASSEMBLY FACTOR 3 AXONEMAL
ENSMUSG00000036934	0.882419	0.0035067	0.0462056	4921524J17Rik	UNKNOWN
ENSMUSG00000040990	0.881831	0.00318582	0.0428386	Sh3kbp1	SH3 DOMAIN CONTAINING KINASE BINDING 1 REGULATOR OF UBIQUITOUS KINASE RUK SH3 CONTAINING EXPRESSED IN TUMORIGENIC ASTROCYTES
ENSMUSG00000026889	0.880835	0.00270923	0.0381599	Rbm18	PROBABLE RNA BINDING 18 RNA BINDING MOTIF 18
ENSMUSG00000026737	0.880352	0.00394194	0.0505188	Pip4k2a	PHOSPHATIDYLINOSITOL 5 PHOSPHATE 4 KINASE TYPE 2 EC_2.7.1.149 1 PHOSPHATIDYLINOSITOL 5 PHOSPHATE 4 KINASE 2 DIPHOSPHOINOSITIDE KINASE 2 PHOSPHATIDYLINOSITOL 5 PHOSPHATE 4 KINASE TYPE II PI 5 P 4 KINASE TYPE II PIP4KII PTDINS 5 P 4 KINASE 2
ENSMUSG00000037007	0.879004	0.00530229	0.062645	Zfp113	ZINC FINGER 3 ZINC FINGER HF 12 ZINC FINGER HZF3 1 ZINC FINGER KOX25
ENSMUSG00000023892	0.878975	0.00435792	0.054369	Zfp51	ZINC FINGER
ENSMUSG00000042111	0.876876	0.00611871	0.0695138	Ccdc115	COILED COIL DOMAIN CONTAINING 115
ENSMUSG00000020656	0.876149	0.00644316	0.0722301	Grhl1	GRAINYHEAD HOMOLOG TRANSCRIPTION FACTOR CP2
ENSMUSG00000034889	0.873219	0.00615442	0.0697596	Cactin	CACTIN
ENSMUSG00000062127	0.872062	0.00472661	0.0578062	Cttnbp2nl	CORTACTIN BINDING 2 CORTBP2
ENSMUSG00000022750	0.871341	0.00879821	0.0908975	Klhl22	KELCH
ENSMUSG00000004394	0.871176	0.00569348	0.0659694	Tmed4	TRANSMEMBRANE EMP24 DOMAIN CONTAINING PRECURSOR
ENSMUSG00000046562	0.868219	0.00943277	0.0956259	Unc119b	UNC 119
ENSMUSG00000048799	0.867435	0.00258058	0.0369517	Cep120	CENTROSOMAL OF 120 KDA CEP120 COILED COIL DOMAIN CONTAINING 100
ENSMUSG00000022120	0.866966	0.0030235	0.0412482	Rnf219	RING FINGER 219
ENSMUSG00000024234	0.866964	0.00363148	0.0474681	Mtpap	POLY A RNA POLYMERASE MITOCHONDRIAL PRECURSOR PAP EC_2.7.7.19 PAP ASSOCIATED DOMAIN CONTAINING 1 POLYNUCLEOTIDE ADENYLYLTRANSFERASE
ENSMUSG00000021175	0.864459	0.00157807	0.0253791	Cdca7l	CELL DIVISION CYCLE ASSOCIATED 7
ENSMUSG00000024242	0.863123	0.00914678	0.0934311	Map4k3	MITOGEN ACTIVATED KINASE KINASE KINASE KINASE EC_2.7.11.1 KINASE MAPK/ERK KINASE KINASE KINASE MEK KINASE KINASE MEKKK
ENSMUSG00000010290	0.863116	0.000937218	0.0170777	AI597479	ASHWIN
ENSMUSG00000037316	0.863026	0.00570603	0.0660564	Bag4	BAG FAMILY MOLECULAR CHAPERONE REGULATOR 4 BAG 4 BCL 2 ASSOCIATED ATHANOGENE 4 SILENCER OF DEATH DOMAINS
ENSMUSG00000018428	0.86299	0.00385379	0.0496317	Akap1	A KINASE ANCHOR 1 MITOCHONDRIAL PRECURSOR A KINASE ANCHOR KDA AKAP DUAL SPECIFICITY A KINASE ANCHORING 1 D AKAP 1 KINASE A ANCHORING 1 PRKA1 SPERMATID A KINASE ANCHOR 84 S AKAP84
ENSMUSG00000061536	0.862755	0.00430358	0.0538635	Sec22c	VESICLE TRAFFICKING SEC22A SEC22 VESICLE TRAFFICKING HOMOLOG A SEC22 VESICLE TRAFFICKING 2
ENSMUSG00000029030	0.862321	0.0040049	0.0511258	Tprgl	TUMOR P63 REGULATED GENE 1 MOSSY FIBER TERMINAL ASSOCIATED VERTEBRATE SPECIFIC PRESYNAPTIC PROTEIN FAM79A
ENSMUSG00000005034	0.862311	0.00726801	0.0791423	Prkacb	CAMP DEPENDENT KINASE CATALYTIC SUBUNIT PKA C EC_2.7.11.11
ENSMUSG00000032462	0.861367	0.00511847	0.0611163	Pik3cb	PHOSPHATIDYLINOSITOL 4 5 BISPHOSPHATE 3 KINASE CATALYTIC SUBUNIT PI3 KINASE SUBUNIT PI3K PTDINS 3 KINASE SUBUNIT EC_2.7.1.153 PHOSPHATIDYLINOSITOL 4 5 BISPHOSPHATE 3 KINASE 110 KDA CATALYTIC SUBUNIT PTDINS 3 KINASE SUBUNIT P110 PHOSPHOINOSITIDE 3 KINASE C
ENSMUSG00000002741	0.85975	0.00605323	0.0689085	Ykt6	SYNAPTOBREVIN HOMOLOG YKT6 PRECURSOR EC_2.3.1.-
ENSMUSG00000045730	0.859127	0.00252801	0.0364815	Adrb2	BETA ADRENERGIC RECEPTOR BETA ADRENORECEPTOR BETA ADRENOCEPTOR
ENSMUSG00000008301	0.858908	0.00652859	0.0728451	Phax	PHOSPHORYLATED ADAPTER RNA EXPORT RNA U SMALL NUCLEAR RNA EXPORT ADAPTER
ENSMUSG00000040451	0.858584	0.00753099	0.0811965	Sgms1	PHOSPHATIDYLCHOLINE:CERAMIDE CHOLINEPHOSPHOTRANSFERASE EC_2.7.8.27 SPHINGOMYELIN SYNTHASE
ENSMUSG00000031365	0.858074	0.00737191	0.0799416	Zfp275	ZINC FINGER 275
ENSMUSG00000047539	0.857543	0.00569658	0.0659762	Fbxo28	F BOX ONLY 28
ENSMUSG00000029647	0.856026	0.00418759	0.0528661	Pan3	PAB DEPENDENT POLY A SPECIFIC RIBONUCLEASE SUBUNIT PAN3 PAB1P DEPENDENT POLY A NUCLEASE
ENSMUSG00000020170	0.85559	0.00308588	0.0417949	Frs2	FIBROBLAST GROWTH FACTOR RECEPTOR SUBSTRATE 3 FGFR SUBSTRATE 3 FGFR SIGNALING ADAPTOR SNT2 SUC1 ASSOCIATED NEUROTROPHIC FACTOR TARGET 2 SNT 2
ENSMUSG00000006134	0.855338	0.00917704	0.0936572	Crkl	ADAPTER MOLECULE CRK PROTO ONCOGENE C CRK P38
ENSMUSG00000000085	0.854801	0.00367635	0.0479829	Scmh1	SEX COMB ON MIDLEG
ENSMUSG00000031939	0.854493	0.00321312	0.0430733	Taf1d	TATA BOX BINDING ASSOCIATED FACTOR RNA POLYMERASE I SUBUNIT D TATA BOX BINDING ASSOCIATED FACTOR 1D TBP ASSOCIATED FACTOR 1D TRANSCRIPTION INITIATION FACTOR SL1/TIF IB SUBUNIT D
ENSMUSG00000048429	0.851802	0.00822747	0.0865006	1810026J23Rik	UNCHARACTERIZED
ENSMUSG00000028459	0.849566	0.0045175	0.0557427	Cd72	B CELL DIFFERENTIATION ANTIGEN CD72 LYB 2 CD72 ANTIGEN
ENSMUSG00000024978	0.848797	0.00650725	0.0726998	Gpam	GLYCEROL 3 PHOSPHATE ACYLTRANSFERASE MITOCHONDRIAL GPAT EC_2.3.1.15
ENSMUSG00000038280	0.847999	0.00927068	0.0943293	Ostm1	OSTEOPETROSIS ASSOCIATED TRANSMEMBRANE 1 PRECURSOR CHLORIDE CHANNEL 7 BETA SUBUNIT
ENSMUSG00000079509	0.84701	0.0032735	0.043704	Zfx	ZINC FINGER
ENSMUSG00000030704	0.84577	0.00776348	0.0830543	Rab6a	RAS RELATED RAB 6
ENSMUSG00000029209	0.844179	0.00375789	0.0487318	Gnpda2	GLUCOSAMINE 6 PHOSPHATE ISOMERASE EC_3.5.99.6 GLUCOSAMINE 6 PHOSPHATE DEAMINASE GNPDA GLCN6P DEAMINASE
ENSMUSG00000087598	0.842339	0.00451212	0.0557026	Zfp111	ZINC FINGER
ENSMUSG00000021384	0.841944	0.00466376	0.0571516	Susd3	SUSHI DOMAIN CONTAINING 3
ENSMUSG00000023025	0.841672	0.0043696	0.05443	Larp4	LA RELATED 4B LA RIBONUCLEOPROTEIN DOMAIN FAMILY MEMBER 4B LA RIBONUCLEOPROTEIN DOMAIN FAMILY MEMBER 5 LA RELATED 5
ENSMUSG00000057134	0.840712	0.00439948	0.0546983	Ado	2 AMINOETHANETHIOL DIOXYGENASE EC_1.13.11.19 CYSTEAMINE DIOXYGENASE
ENSMUSG00000063410	0.84062	0.00569293	0.0659694	Stk24	SERINE/THREONINE KINASE EC_2.7.11.1 STE20 KINASE KINASE KINASE
ENSMUSG00000053684	0.840482	0.00265642	0.0376915	BC048403	UNKNOWN
ENSMUSG00000031838	0.840177	0.00287802	0.039781	Ifi30	GAMMA INTERFERON INDUCIBLE LYSOSOMAL THIOL REDUCTASE PRECURSOR EC_1.8.-.- GAMMA INTERFERON INDUCIBLE IP 30
ENSMUSG00000049422	0.836642	0.000782414	0.0148148	Chchd10	COILED COIL HELIX COILED COIL HELIX DOMAIN CONTAINING 10 MITOCHONDRIAL PRECURSOR 4
ENSMUSG00000035914	0.836184	0.0023169	0.0342069	Cd276	CD276 ANTIGEN PRECURSOR B7 HOMOLOG 3 B7 H3 COSTIMULATORY MOLECULE CD276 ANTIGEN
ENSMUSG00000036087	0.835673	0.0043029	0.0538635	Slain2	SLAIN MOTIF CONTAINING
ENSMUSG00000060147	0.834358	0.007614	0.0818823	Serpinb6a	SERPIN
ENSMUSG00000038028	0.834229	0.00359929	0.047165	9630033F20Rik	FRUCTOSE 2 6 BISPHOSPHATASE TIGAR EC_3.1.3.46 TP53 INDUCED GLYCOLYSIS AND APOPTOSIS REGULATOR
ENSMUSG00000009687	0.833966	0.00571283	0.066106	Fxyd5	FXYD DOMAIN CONTAINING ION TRANSPORT REGULATOR 5 PRECURSOR
ENSMUSG00000028703	0.833598	0.00862915	0.089681	Lrrc41	LEUCINE RICH REPEAT CONTAINING 41
ENSMUSG00000055991	0.833542	0.00417256	0.0527779	Zkscan5	ZINC FINGER WITH KRAB AND SCAN DOMAINS 5 ZINC FINGER 95 ZFP 95
ENSMUSG00000057409	0.833297	0.00878353	0.0908174	Zfp53	ZINC FINGER
ENSMUSG00000091474	0.832175	0.00654037	0.0728456	2610021A01Rik	ZINC FINGER
ENSMUSG00000006373	0.832144	0.00307981	0.0417804	Pgrmc1	MEMBRANE ASSOCIATED PROGESTERONE RECEPTOR COMPONENT
ENSMUSG00000013539	0.831871	0.00857084	0.0892163	Tango2	TRANSPORT AND GOLGI ORGANIZATION 2 HOMOLOG
ENSMUSG00000033909	0.831392	0.00912319	0.0932992	Usp36	UBIQUITIN CARBOXYL TERMINAL HYDROLASE EC_3.4.19.12 DEUBIQUITINATING ENZYME UBIQUITIN THIOESTERASE UBIQUITIN SPECIFIC PROCESSING PROTEASE
ENSMUSG00000074746	0.830143	0.00910101	0.0931814	Pdzd8	PDZ DOMAIN CONTAINING 8 SARCOMA ANTIGEN NY SAR 84/NY SAR 104
ENSMUSG00000034723	0.830139	0.00807488	0.0853067	Tmx4	THIOREDOXIN RELATED TRANSMEMBRANE PRECURSOR THIOREDOXIN DOMAIN CONTAINING
ENSMUSG00000056383	0.829335	0.00641085	0.0720012	AI987944	ZINC FINGER
ENSMUSG00000003135	0.827541	0.00761645	0.0818823	Cnot11	CCR4 NOT TRANSCRIPTION COMPLEX SUBUNIT 11
ENSMUSG00000027942	0.827315	0.00746557	0.0806571	4933434E20Rik	UNCHARACTERIZED
ENSMUSG00000028581	0.827149	0.00618152	0.0699852	Laptm5	LYSOSOMAL ASSOCIATED TRANSMEMBRANE 5 LYSOSOMAL ASSOCIATED MULTITRANSMEMBRANE 5 RETINOIC ACID INDUCIBLE E3
ENSMUSG00000034993	0.824499	0.00727337	0.0791677	Vat1	SYNAPTIC VESICLE MEMBRANE VAT 1 EC 1
ENSMUSG00000029922	0.824035	0.00737884	0.0799791	Mkrn1	E3 UBIQUITIN LIGASE MAKORIN EC_6.3.2.-
ENSMUSG00000001419	0.823515	0.00751887	0.0811326	Mef2d	MYOCYTE SPECIFIC ENHANCER FACTOR
ENSMUSG00000000420	0.822522	0.00337422	0.044843	Galnt1	POLYPEPTIDE N ACETYLGALACTOSAMINYLTRANSFERASE EC_2.4.1.41 POLYPEPTIDE GALNAC TRANSFERASE GALNAC PP GANTASE UDP ACETYLGALACTOSAMINYLTRANSFERASE UDP GALNAC:POLYPEPTIDE N ACETYLGALACTOSAMINYLTRANSFERASE
ENSMUSG00000025068	0.821815	0.00618135	0.0699852	Gsto1	GLUTATHIONE S TRANSFERASE OMEGA 1 GSTO 1 EC_2.5.1.18 GLUTATHIONE S TRANSFERASE OMEGA 1 1 GSTO 1 1 GLUTATHIONE DEPENDENT DEHYDROASCORBATE REDUCTASE EC_1.8.5.- 1 MONOMETHYLARSONIC ACID REDUCTASE MMA V REDUCTASE EC_1.20.-.- 4 2 S PHENACYL GLUTATHIONE REDUCTA
ENSMUSG00000081583	0.821798	0.00595551	0.0680433	Gm14769
ENSMUSG00000029672	0.817148	0.0033086	0.0441051	Fam3c	PRECURSOR
ENSMUSG00000060063	0.816903	0.00778975	0.083169	Alox5ap	ARACHIDONATE 5 LIPOXYGENASE ACTIVATING FLAP MK 886 BINDING
ENSMUSG00000061273	0.814768	0.00131937	0.0222891	Mmgt1	MEMBRANE MAGNESIUM TRANSPORTER 1 PRECURSOR ER MEMBRANE COMPLEX SUBUNIT 5 TRANSMEMBRANE 32
ENSMUSG00000057363	0.814636	0.00753023	0.0811965	Uxs1	UDP GLUCURONIC ACID DECARBOXYLASE 1 EC_4.1.1.35 UDP GLUCURONATE DECARBOXYLASE 1 UXS 1
ENSMUSG00000026655	0.813973	0.00176954	0.0277506	Fam107b	UNKNOWN
ENSMUSG00000020988	0.812471	0.00816563	0.0860229	L2hgdh	L 2 HYDROXYGLUTARATE DEHYDROGENASE MITOCHONDRIAL PRECURSOR EC_1.1.99.2
ENSMUSG00000043885	0.81243	0.00591498	0.0677438	Slc36a4	PROTON COUPLED AMINO ACID TRANSPORTER PROTON/AMINO ACID TRANSPORTER SOLUTE CARRIER FAMILY 36 MEMBER
ENSMUSG00000037499	0.810925	0.00585626	0.0673373	Nenf	NEUDESIN PRECURSOR NEURON DERIVED NEUROTROPHIC FACTOR SCIRP10 RELATED SPINAL CORD INJURY RELATED 10
ENSMUSG00000039270	0.810488	0.00396385	0.0507252	Megf9	MULTIPLE EPIDERMAL GROWTH FACTOR DOMAINS 9 PRECURSOR MULTIPLE EGF DOMAINS 9 EPIDERMAL GROWTH FACTOR 5 EGF 5
ENSMUSG00000027207	0.804979	0.00987969	0.0991409	Galk2	GALACTOKINASE EC_2.7.1.6 GALACTOSE KINASE
ENSMUSG00000001942	0.804675	0.0049935	0.0600617	Siae	SIALATE O ACETYLESTERASE PRECURSOR EC_3.1.1.53 SIALIC ACID SPECIFIC 9 O ACETYLESTERASE YOLK SAC 2 [CONTAINS SIALATE O ACETYLESTERASE SMALL SUBUNIT; SIALATE O ACETYLESTERASE LARGE SUBUNIT]
ENSMUSG00000033728	0.804415	0.0091832	0.0936572	Lrrc14	LEUCINE RICH REPEAT CONTAINING 14
ENSMUSG00000053470	0.803376	0.00571847	0.066142	Kdm3a	LYSINE SPECIFIC DEMETHYLASE 3A EC_1.14.11.- JMJC DOMAIN CONTAINING HISTONE DEMETHYLATION 2A JUMONJI DOMAIN CONTAINING 1A
ENSMUSG00000037526	0.802767	0.00465182	0.0570779	Atg14	BECLIN 1 ASSOCIATED AUTOPHAGY RELATED KEY REGULATOR BARKOR AUTOPHAGY RELATED 14 ATG14L
ENSMUSG00000074064	0.802342	0.00233547	0.0344036	Mlycd	MALONYL COA DECARBOXYLASE MITOCHONDRIAL PRECURSOR MCD EC_4.1.1.9
ENSMUSG00000053134	0.801025	0.00777961	0.083169	Supt7l	STAGA COMPLEX 65 SUBUNIT GAMMA SPTF ASSOCIATED FACTOR 65 GAMMA STAF65GAMMA SUPPRESSOR OF TY 7
ENSMUSG00000026439	0.800958	0.00973617	0.0980385	Rbbp5	RETINOBLASTOMA BINDING 5 RBBP 5
ENSMUSG00000035007	0.799214	0.00803954	0.0850019	Rundc1	RUN DOMAIN CONTAINING 1
ENSMUSG00000026827	0.79899	0.00485402	0.0588701	Gpd2	GLYCEROL 3 PHOSPHATE DEHYDROGENASE MITOCHONDRIAL PRECURSOR GPD M GPDH M EC_1.1.5.3
ENSMUSG00000029804	0.798382	0.00648622	0.0725886	Herc3	PROBABLE E3 UBIQUITIN LIGASE HERC4 EC_6.3.2.- HECT DOMAIN AND RCC1 DOMAIN CONTAINING 4
ENSMUSG00000024026	0.79779	0.00581114	0.0670364	Glo1	LACTOYLGLUTATHIONE LYASE EC_4.4.1.5 ALDOKETOMUTASE GLYOXALASE I GLX I KETONE ALDEHYDE MUTASE METHYLGLYOXALASE S D LACTOYLGLUTATHIONE METHYLGLYOXAL LYASE
ENSMUSG00000036430	0.797348	0.00887331	0.0914931	Tbcc	TUBULIN SPECIFIC CHAPERONE C TUBULIN FOLDING COFACTOR C CFC
ENSMUSG00000018474	0.796145	0.0037288	0.0484504	Chd3	CHROMODOMAIN HELICASE DNA BINDING EC_3.6.4.12 ATP DEPENDENT HELICASE
ENSMUSG00000021645	0.795896	0.00946205	0.0958302	Smn1	SURVIVAL MOTOR NEURON
ENSMUSG00000032050	0.792868	0.00778907	0.083169	Rdx	MOESIN
ENSMUSG00000083282	0.792797	0.00676094	0.0746436	Ctsf	PRECURSOR
ENSMUSG00000035473	0.791534	0.00453613	0.05592	Galm	ALDOSE 1 EPIMERASE EC_5.1.3.3 GALACTOSE MUTAROTASE
ENSMUSG00000003948	0.789706	0.00156491	0.0252263	Mmd	MONOCYTE TO MACROPHAGE DIFFERENTIATION FACTOR PROGESTIN AND ADIPOQ RECEPTOR FAMILY MEMBER PROGESTIN AND ADIPOQ RECEPTOR FAMILY MEMBER
ENSMUSG00000031605	0.789209	0.00911374	0.0932753	Klhl2	KELCH
ENSMUSG00000027194	0.789046	0.00527308	0.0624223	Ttc17	TETRATRICOPEPTIDE REPEAT 17 TPR REPEAT 17
ENSMUSG00000054814	0.788704	0.00938991	0.0953944	Usp46	UBIQUITIN CARBOXYL TERMINAL HYDROLASE 12 EC_3.4.19.12 DEUBIQUITINATING ENZYME 12 UBIQUITIN THIOESTERASE 12 UBIQUITIN SPECIFIC PROCESSING PROTEASE 12
ENSMUSG00000030850	0.788649	0.00689358	0.0757889	Ate1	ARGINYL TRNA TRANSFERASE 1 ARGINYLTRANSFERASE 1 R TRANSFERASE 1 EC_2.3.2.8 ARGININE TRNA TRANSFERASE 1
ENSMUSG00000035666	0.78749	0.00593839	0.0678773	Gtf3c4	GENERAL TRANSCRIPTION FACTOR 3C POLYPEPTIDE 4 EC_2.3.1.48 TF3C DELTA TRANSCRIPTION FACTOR IIIC 90 KDA SUBUNIT TFIIIC 90 KDA SUBUNIT TFIIIC90 TRANSCRIPTION FACTOR IIIC SUBUNIT DELTA
ENSMUSG00000092416	0.785854	0.00729553	0.0792772	Zfp141	ZINC FINGER
ENSMUSG00000035649	0.785088	0.00632228	0.0712098	Zcchc7	ZINC FINGER CCHC DOMAIN CONTAINING 7
ENSMUSG00000025722	0.783725	0.00897338	0.0921986	Wdr73	WD REPEAT CONTAINING 73
ENSMUSG00000031441	0.782153	0.00817869	0.0860992	Atp11a	PROBABLE PHOSPHOLIPID TRANSPORTING ATPASE EC_3.6.3.1 ATPASE CLASS VI TYPE
ENSMUSG00000059897	0.781309	0.00669458	0.0740982	Zfp930	ZINC FINGER
ENSMUSG00000020525	0.781145	0.00975268	0.098167	Ppm1d	PHOSPHATASE 1D EC_3.1.3.16 PHOSPHATASE 2C DELTA PP2C DELTA PHOSPHATASE MAGNESIUM DEPENDENT 1 DELTA P53 INDUCED PHOSPHATASE 1
ENSMUSG00000003346	0.778744	0.00491959	0.0595003	Abhd17a	ALPHA/BETA HYDROLASE DOMAIN CONTAINING EC 3
ENSMUSG00000019966	0.774809	0.00764331	0.0820701	Kitl	KIT LIGAND PRECURSOR MAST CELL GROWTH FACTOR MGF STEM CELL FACTOR SCF C KIT LIGAND [CONTAINS SOLUBLE KIT LIGAND SKITLG
ENSMUSG00000030965	0.774536	0.00523928	0.0621345	Fam175b	BRISC COMPLEX SUBUNIT ABRO1 ABRAXAS BROTHER 1 FAM175B
ENSMUSG00000020544	0.771186	0.00786404	0.0836523	Cox11	CYTOCHROME C OXIDASE ASSEMBLY COX11
ENSMUSG00000002625	0.770874	0.0074922	0.0809114	Akap8l	A KINASE ANCHOR 8 AKAP 8 A KINASE ANCHOR 95 KDA AKAP 95
ENSMUSG00000025086	0.76899	0.00486992	0.0590357	Trub1	PROBABLE TRNA PSEUDOURIDINE SYNTHASE 1 EC_5.4.99.-
ENSMUSG00000030689	0.768268	0.00810764	0.0855151	Ino80e	INO80 COMPLEX SUBUNIT E COILED COIL DOMAIN CONTAINING 95
ENSMUSG00000030232	0.768056	0.00578817	0.0668009	Aebp2	ZINC FINGER AEBP2 ADIPOCYTE ENHANCER BINDING 2 AE BINDING 2
ENSMUSG00000034931	0.767283	0.00983856	0.0988056	Dhx8	ATP DEPENDENT RNA HELICASE EC_3.6.4.13
ENSMUSG00000021681	0.766605	0.00762859	0.0819792	Aggf1	ANGIOGENIC FACTOR WITH G PATCH AND FHA DOMAINS 1 ANGIOGENIC FACTOR VG5Q
ENSMUSG00000037938	0.761581	0.00612133	0.0695138	Chchd5	COILED COIL HELIX COILED COIL HELIX DOMAIN CONTAINING 5
ENSMUSG00000074604	0.760731	0.00317353	0.0427832	Mgst2	MICROSOMAL GLUTATHIONE S TRANSFERASE 2 MICROSOMAL GST 2 EC_2.5.1.18
ENSMUSG00000038456	0.756026	0.0056929	0.0659694	Dennd2a	DENN DOMAIN CONTAINING
ENSMUSG00000030605	0.753239	0.00528559	0.062514	Mfge8	LACTADHERIN PRECURSOR MFGM MILK FAT GLOBULE EGF FACTOR 8 MFG E8 SED1
ENSMUSG00000038871	0.752224	0.00760178	0.0818252	Bpgm	PHOSPHOGLYCERATE MUTASE EC_3.1.3.13 EC_5.4.2.- 1 EC_5.4.-.- 2 4 BPG DEPENDENT PGAM PHOSPHOGLYCERATE MUTASE ISOZYME PGAM
ENSMUSG00000021500	0.747068	0.00598088	0.068244	Ddx46	PRE PROCESSING ATP DEPENDENT RNA HELICASE PRP5 EC_3.6.4.13
ENSMUSG00000032228	0.746566	0.00563205	0.0654349	Tcf12	TRANSCRIPTION FACTOR CLASS HELIX LOOP HELIX TRANSCRIPTION FACTOR
ENSMUSG00000026313	0.745788	0.00804426	0.0850176	Hdac4	HISTONE DEACETYLASE EC_3.5.1.98
ENSMUSG00000022488	0.7454	0.00666304	0.0738114	Nckap1l	NCK ASSOCIATED 1 1 MEMBRANE ASSOCIATED HEM
ENSMUSG00000032373	0.744673	0.00547298	0.0641516	Car12	CARBONIC ANHYDRASE PRECURSOR EC_4.2.1.1 CARBONATE DEHYDRATASE CARBONIC ANHYDRASE CA
ENSMUSG00000061461	0.742792	0.00866927	0.0899909	Smim20	UNKNOWN
ENSMUSG00000040520	0.741042	0.00838559	0.0877759	Manea	GLYCOPROTEIN ENDO ALPHA 1 2 MANNOSIDASE ENDO ALPHA MANNOSIDASE ENDOMANNOSIDASE EC_3.2.1.130
ENSMUSG00000010392	0.74084	0.00843312	0.088152	Gosr1	GOLGI SNAP RECEPTOR COMPLEX MEMBER 1.28 KDA GOLGI SNARE 28 KDA CIS GOLGI SNARE P28
ENSMUSG00000037405	0.739407	0.00645838	0.0723697	Icam1	INTERCELLULAR ADHESION MOLECULE 1 PRECURSOR ICAM 1 CD54 ANTIGEN
ENSMUSG00000052911	0.739057	0.00796765	0.084412	Lamb2	LAMININ SUBUNIT BETA PRECURSOR LAMININ CHAIN LAMININ SUBUNIT BETA LAMININ SUBUNIT BETA LAMININ SUBUNIT BETA LAMININ SUBUNIT BETA LAMININ SUBUNIT BETA LAMININ SUBUNIT BETA
ENSMUSG00000063108	0.736574	0.0089396	0.0919597	Zfp26	ZINC FINGER
ENSMUSG00000009535	0.736027	0.00943195	0.0956259	Rnmt	CAP GUANINE N7 METHYLTRANSFERASE EC_2.1.1.56 RG7MT1 GUANINE N 7 METHYLTRANSFERASE CAP METHYLTRANSFERASE
ENSMUSG00000026181	0.734933	0.00705196	0.077194	Ppm1f	PHOSPHATASE 1E EC_3.1.3.16 CA 2+ /CALMODULIN DEPENDENT KINASE PHOSPHATASE N CAMKP N CAMKP NUCLEUS CAMKN PARTNER OF PIX 1 PARTNER OF PIX ALPHA PARTNER OF PIXA
ENSMUSG00000031631	0.734813	0.00784361	0.0835707	4933411K20Rik	HOMOLOG
ENSMUSG00000021510	0.731757	0.00875139	0.0906267	A530054K11Rik	ZINC FINGER
ENSMUSG00000028980	0.731374	0.00683722	0.0752639	H6pd	GDH/6PGL ENDOPLASMIC BIFUNCTIONAL GLUCOSE 1 DEHYDROGENASE EC_1.1.1.47 HEXOSE 6 PHOSPHATE DEHYDROGENASE ; 6 PHOSPHOGLUCONOLACTONASE 6PGL EC_3.1.1.- 31 ]
ENSMUSG00000025103	0.730893	0.00933122	0.0948716	Btbd1	BTB/POZ DOMAIN CONTAINING
ENSMUSG00000019763	0.727812	0.00794663	0.0842233	Rmnd1	REQUIRED MEIOTIC NUCLEAR DIVISION 1 HOMOLOG PRECURSOR
ENSMUSG00000028243	0.716115	0.00731393	0.0794115	Ubxn2b	UBX DOMAIN CONTAINING 2B NSFL1 COFACTOR P37 P97 COFACTOR P37
ENSMUSG00000022698	0.715637	0.0096696	0.0975179	Naa50	N ALPHA ACETYLTRANSFERASE 50 EC_2.3.1.- N ACETYLTRANSFERASE NATE CATALYTIC SUBUNIT
ENSMUSG00000033386	0.714504	0.0078759	0.0837445	Frrs1	FERRIC CHELATE REDUCTASE 1 EC 1 STROMAL CELL DERIVED RECEPTOR 2 SDR 2
ENSMUSG00000029247	0.70519	0.00559032	0.0651418	Paics	MULTIFUNCTIONAL PHOSPHORIBOSYLAMINOIMIDAZOLE SUCCINOCARBOXAMIDE SYNTHASE EC_6.3.2.6 SAICAR SYNTHETASE ; PHOSPHORIBOSYLAMINOIMIDAZOLE CARBOXYLASE EC_4.1.1.- 21 AIR CARBOXYLASE AIRC ]
ENSMUSG00000046876	0.702769	0.00505344	0.0605605	Atxn1	ATAXIN 1 SPINOCEREBELLAR ATAXIA TYPE 1
ENSMUSG00000015214	0.701516	0.008745	0.0906149	Mtmr1	MYOTUBULARIN
ENSMUSG00000026663	0.699876	0.00673903	0.0744331	Atf6	CYCLIC AMP DEPENDENT TRANSCRIPTION FACTOR ATF 6 BETA CAMP DEPENDENT TRANSCRIPTION FACTOR ATF 6 BETA ACTIVATING TRANSCRIPTION FACTOR 6 BETA ATF6 BETA CAMP RESPONSE ELEMENT BINDING RELATED CREB RP CAMP RESPONSIVE ELEMENT BINDING 1 [CONTAINS PROCESSED CYCLI
ENSMUSG00000049313	0.698641	0.0046199	0.0567127	Sorl1	SORTILIN RELATED RECEPTOR LOW DENSITY LIPOPROTEIN RECEPTOR RELATIVE WITH 11 LIGAND BINDING REPEATS LDLR RELATIVE WITH 11 LIGAND BINDING REPEATS LR11 SORLA 1 SORTING RELATED RECEPTOR CONTAINING LDLR CLASS A REPEATS
ENSMUSG00000087679	0.695674	0.00728099	0.0792055	C330006A16Rik
ENSMUSG00000024759	0.692855	0.00815035	0.0858965	Atl3	ATLASTIN EC_3.6.5.-
ENSMUSG00000042082	0.691049	0.00679943	0.0749109	Arsb	ARYLSULFATASE B ASB EC_3.1.6.12 N ACETYLGALACTOSAMINE 4 SULFATASE G4S
ENSMUSG00000025898	0.682938	0.00420782	0.0529939	Cwf19l2	CWF19 2
ENSMUSG00000075611	0.596483	0.00701476	0.0768312	Gm11545
ENSMUSG00000058715	-0.683546	0.00881221	0.0910063	Fcer1g	HIGH AFFINITY IMMUNOGLOBULIN EPSILON RECEPTOR SUBUNIT GAMMA PRECURSOR FC RECEPTOR GAMMA CHAIN FCRGAMMA FC EPSILON RI GAMMA IGE FC RECEPTOR SUBUNIT GAMMA FCERI GAMMA
ENSMUSG00000021910	-0.722819	0.00649059	0.0726065	Nisch	NISCHARIN IMIDAZOLINE RECEPTOR 1 I 1 IR1 IMIDAZOLINE RECEPTOR 1 IMIDAZOLINE 1 RECEPTOR I1R
ENSMUSG00000060680	-0.7395	0.00907226	0.0929233	Gm8894
ENSMUSG00000015149	-0.748206	0.00992182	0.0995256	Sirt2	NAD DEPENDENT DEACETYLASE SIRTUIN 2 EC_3.5.1.- REGULATORY SIR2 HOMOLOG 2 SIR2 2
ENSMUSG00000043895	-0.759825	0.00438117	0.0545224	S1pr2	SPHINGOSINE 1 PHOSPHATE RECEPTOR S1P RECEPTOR ENDOTHELIAL DIFFERENTIATION G COUPLED RECEPTOR SPHINGOSINE 1 PHOSPHATE RECEPTOR EDG S1P RECEPTOR EDG
ENSMUSG00000032038	-0.762042	0.00565912	0.0657165	St3gal4	CMP N ACETYLNEURAMINATE BETA GALACTOSAMIDE ALPHA 2 3 SIALYLTRANSFERASE 4 ALPHA 2 3 ST 4 BETA GALACTOSIDE ALPHA 2 3 SIALYLTRANSFERASE 4 EC_2.4.99.- ALPHA 2 3 SIALYLTRANSFERASE IV GAL BETA 1 4 GALNAC ALPHA 2 3 SIALYLTRANSFERASE ST3GAL IV ST3GALIV SIALYLTRAN
ENSMUSG00000023367	-0.769243	0.00843627	0.088152	Tmem176a	TRANSMEMBRANE 176A
ENSMUSG00000015522	-0.774367	0.00935652	0.095092	Arnt	ARYL HYDROCARBON RECEPTOR NUCLEAR TRANSLOCATOR HYPOXIA INDUCIBLE FACTOR 1 BETA
ENSMUSG00000047905	-0.775177	0.00495844	0.0598321	Gm8566
ENSMUSG00000060550	-0.776375	0.00773137	0.0828461	H2-Q7	H 2 CLASS I HISTOCOMPATIBILITY ANTIGEN ALPHA CHAIN
ENSMUSG00000055413	-0.779895	0.00630489	0.0711055	H2-Q5
ENSMUSG00000090560	-0.786912	0.00742862	0.080291	NA	NA
ENSMUSG00000031060	-0.79017	0.0062432	0.070592	Rbm10	RNA BINDING RNA BINDING MOTIF
ENSMUSG00000022684	-0.790759	0.00848242	0.0884716	Bfar	BIFUNCTIONAL APOPTOSIS REGULATOR
ENSMUSG00000026554	-0.793047	0.00828362	0.0869863	Dcaf8	DDB1 AND CUL4 ASSOCIATED FACTOR 8 WD REPEAT CONTAINING
ENSMUSG00000031400	-0.793269	0.00545659	0.0640453	G6pdx	GLUCOSE 6 PHOSPHATE 1 DEHYDROGENASE G6PD EC_1.1.1.49
ENSMUSG00000036752	-0.795135	0.00627341	0.0708263	Tubb4b	TUBULIN BETA CHAIN
ENSMUSG00000030403	-0.800246	0.00972645	0.0979781	Vasp	ENA/VASP ENA/VASODILATOR STIMULATED PHOSPHOPROTEIN
ENSMUSG00000083994	-0.800491	0.00477363	0.0581913	Gm16465
ENSMUSG00000066629	-0.801191	0.00845541	0.08826	Rpl36-ps3	60S RIBOSOMAL L36
ENSMUSG00000002820	-0.801785	0.00943459	0.0956259	Atg4d	CYSTEINE PROTEASE EC_3.4.22.- AUT CYSTEINE ENDOPEPTIDASE AUTOPHAGIN AUTOPHAGY RELATED CYSTEINE ENDOPEPTIDASE AUTOPHAGY RELATED 4 HOMOLOG
ENSMUSG00000030188	-0.802111	0.00881976	0.0910484	Magohb	MAGO NASHI HOMOLOG
ENSMUSG00000039158	-0.802745	0.00202012	0.0308142	Akna	AT HOOK CONTAINING TRANSCRIPTION FACTOR
ENSMUSG00000020451	-0.804533	0.00838986	0.0877855	Limk2	LIM DOMAIN KINASE LIMK EC_2.7.11.1
ENSMUSG00000040829	-0.810683	0.00641925	0.0720049	Zmynd15	ZINC FINGER MYND DOMAIN CONTAINING 15
ENSMUSG00000081975	-0.811059	0.00157744	0.0253791	Gm12482
ENSMUSG00000081578	-0.81293	0.00186363	0.0289321	Gm12611
ENSMUSG00000031753	-0.813472	0.00740092	0.0800906	Cog4	CONSERVED OLIGOMERIC GOLGI COMPLEX SUBUNIT 4 COG COMPLEX SUBUNIT 4 COMPONENT OF OLIGOMERIC GOLGI COMPLEX 4
ENSMUSG00000016496	-0.814876	0.00480176	0.0584255	Cd274	PROGRAMMED CELL DEATH 1 LIGAND 1 PRECURSOR PD L1 PDCD1 LIGAND 1 PROGRAMMED DEATH LIGAND 1 B7 HOMOLOG 1 B7 H1 CD274 ANTIGEN
ENSMUSG00000038122	-0.816795	0.00942284	0.0956177	D630037F22Rik	BROAD MINDED
ENSMUSG00000061132	-0.818638	0.00980149	0.0986204	Blnk	B CELL LINKER B CELL ADAPTER CONTAINING A SH2 DOMAIN B CELL ADAPTER CONTAINING A SRC HOMOLOGY 2 DOMAIN CYTOPLASMIC ADAPTER SRC HOMOLOGY 2 DOMAIN CONTAINING LEUKOCYTE OF 65 KDA SLP 65
ENSMUSG00000079737	-0.820795	0.00568789	0.0659694	3110001I22Rik	PERIPHILIN 1
ENSMUSG00000054733	-0.825444	0.00665144	0.0738077	Msra	MITOCHONDRIAL PEPTIDE METHIONINE SULFOXIDE REDUCTASE PRECURSOR EC_1.8.4.11 PEPTIDE METHIONINE S S OXIDE REDUCTASE PEPTIDE MET O REDUCTASE METHIONINE S OXIDE REDUCTASE
ENSMUSG00000042901	-0.82595	0.00353652	0.0464818	Aida	AXIN INTERACTOR DORSALIZATION ASSOCIATED AXIN INTERACTION PARTNER AND DORSALIZATION ANTAGONIST
ENSMUSG00000036501	-0.829567	0.00793417	0.0841594	Fam13b	FAM13A
ENSMUSG00000046341	-0.831276	0.00871915	0.0904296	Gm11223
ENSMUSG00000059179	-0.833616	0.00843834	0.088152	Gm8991	HETEROGENEOUS NUCLEAR RIBONUCLEOPROTEIN
ENSMUSG00000026065	-0.835397	0.00421539	0.0530589	Slc9a4	SODIUM/HYDROGEN EXCHANGER NA + /H + EXCHANGER NHE SOLUTE CARRIER FAMILY 9 MEMBER
ENSMUSG00000031864	-0.835446	0.0085925	0.0893708	Ints10	INTEGRATOR COMPLEX SUBUNIT 10 INT10
ENSMUSG00000055850	-0.836106	0.00983873	0.0988056	Rnf181	E3 UBIQUITIN LIGASE RNF181 EC_6.3.2.- RING FINGER 181
ENSMUSG00000028894	-0.836771	0.0051702	0.0614681	Inpp5b	TYPE II INOSITOL 1 4 5 TRISPHOSPHATE 5 PHOSPHATASE PRECURSOR EC_3.1.3.36 INOSITOL POLYPHOSPHATE 5 PHOSPHATASE PHOSPHOINOSITIDE 5 PHOSPHATASE 5PTASE
ENSMUSG00000037787	-0.838333	0.00898513	0.0922832	Apopt1	APOPTOGENIC 1 MITOCHONDRIAL PRECURSOR APOP 1
ENSMUSG00000024319	-0.83971	0.00546081	0.0640571	Vps52	VACUOLAR SORTING ASSOCIATED 52 HOMOLOG SAC2 SUPPRESSOR OF ACTIN MUTATIONS 2
ENSMUSG00000049891	-0.839838	0.0050277	0.0603899	Gm7984
ENSMUSG00000043177	-0.840485	0.0039609	0.0507123	Gm11993
ENSMUSG00000040620	-0.841839	0.00875817	0.0906267	Dhx33	ATP DEPENDENT RNA HELICASE EC_3.6.4.13
ENSMUSG00000027411	-0.841996	0.00896576	0.0921926	Vps16	VACUOLAR SORTING ASSOCIATED 16 HOMOLOG
ENSMUSG00000032604	-0.842417	0.00485191	0.0588701	Qars	GLUTAMINE TRNA LIGASE EC_6.1.1.18 GLUTAMINYL TRNA SYNTHETASE GLNRS
ENSMUSG00000025474	-0.844832	0.0091799	0.0936572	Tubgcp2	GAMMA TUBULIN COMPLEX COMPONENT 2 GAMMA RING COMPLEX KDA
ENSMUSG00000024055	-0.845284	0.00825822	0.0867543	Cyp4f13	CYTOCHROME P450
ENSMUSG00000094463	-0.846388	0.007848	0.0835834	Gm8546
ENSMUSG00000022957	-0.846702	0.00318269	0.0428386	Itsn1	INTERSECTIN
ENSMUSG00000029752	-0.849579	0.00516016	0.0614373	Asns	ASPARAGINE SYNTHETASE [GLUTAMINE HYDROLYZING] EC_6.3.5.4 GLUTAMINE DEPENDENT ASPARAGINE SYNTHETASE
ENSMUSG00000082043	-0.852308	0.0065416	0.0728456	Gm12848
ENSMUSG00000025872	-0.852863	0.00466437	0.0571516	Thoc3	THO COMPLEX SUBUNIT 3 THO3
ENSMUSG00000009585	-0.854464	0.00555807	0.064859	Apobec3	DNA DC >DU EDITING ENZYME EC_3.5.4.-
ENSMUSG00000027933	-0.85468	0.00648234	0.0725762	Ints3	INTEGRATOR COMPLEX SUBUNIT 3 SOSS COMPLEX SUBUNIT A
ENSMUSG00000084006	-0.855038	0.00578394	0.0667814	Gm14245
ENSMUSG00000031072	-0.855686	0.0058847	0.0675285	Oraov1	ORAL CANCER OVEREXPRESSED 1
ENSMUSG00000017264	-0.855713	0.00981289	0.0986595	Exosc10	EXOSOME COMPONENT 10 EC_3.1.13.- AUTOANTIGEN PM/SCL 2 POLYMYOSITIS/SCLERODERMA AUTOANTIGEN 2
ENSMUSG00000068566	-0.85633	0.00187945	0.0291604	Myadm	MYELOID ASSOCIATED DIFFERENTIATION MARKER
ENSMUSG00000062234	-0.856843	0.0069882	0.0765724	Gak	TYROSINE PHOSPHATASE AUXILIN EC_3.1.3.48 DNAJ HOMOLOG SUBFAMILY C MEMBER 6
ENSMUSG00000056050	-0.857302	0.00178345	0.0279187	Mia3	MELANOMA INHIBITORY ACTIVITY 3 PRECURSOR TRANSPORT AND GOLGI ORGANIZATION 1 TANGO1
ENSMUSG00000083672	-0.857425	0.00950274	0.0962052	Gm9183
ENSMUSG00000044768	-0.858223	0.0066409	0.0737531	D1Ertd622e	UNC119 BINDING
ENSMUSG00000028567	-0.858292	0.00272175	0.0383065	Txndc12	THIOREDOXIN DOMAIN CONTAINING 12 PRECURSOR EC_1.8.4.2 ENDOPLASMIC RETICULUM RESIDENT 19 ER 19 ERP19 THIOREDOXIN P19
ENSMUSG00000079491	-0.859806	0.00387873	0.0498794	H2-T10
ENSMUSG00000028070	-0.86027	0.00749779	0.0809385	Apoa1bp	NAD P H HYDRATE EPIMERASE EC_5.1.99.6 NAD P HX EPIMERASE
ENSMUSG00000024410	-0.860985	0.00331702	0.0441948	3110002H16Rik	UNCHARACTERIZED COLON CANCER ASSOCIATED MIC1 MIC 1
ENSMUSG00000031311	-0.861828	0.00615627	0.0697596	Nono	AMBIGUOUS
ENSMUSG00000068040	-0.863253	0.00720308	0.078533	Tm9sf4	TRANSMEMBRANE 9 SUPERFAMILY MEMBER PRECURSOR
ENSMUSG00000019433	-0.863822	0.00417843	0.0528268	Gipc1	PDZ DOMAIN CONTAINING
ENSMUSG00000035284	-0.865861	0.00859153	0.0893708	Vps13c	VACUOLAR SORTING ASSOCIATED 13A CHOREA ACANTHOCYTOSIS CHOREIN
ENSMUSG00000014355	-0.866064	0.00904538	0.0927204	Anapc1	ANAPHASE PROMOTING COMPLEX SUBUNIT 1 APC1 CYCLOSOME SUBUNIT 1 MITOTIC CHECKPOINT REGULATOR TESTIS SPECIFIC GENE 24
ENSMUSG00000030263	-0.867062	0.00654154	0.0728456	Lrmp	LYMPHOID RESTRICTED MEMBRANE PROTEIN JAW1 [CONTAINS PROCESSED LYMPHOID RESTRICTED MEMBRANE PROTEIN]
ENSMUSG00000055681	-0.867569	0.003052	0.0415506	Cope	COATOMER SUBUNIT EPSILON EPSILON COAT EPSILON COP
ENSMUSG00000024911	-0.867906	0.00447239	0.0553947	Fibp	ACIDIC FIBROBLAST GROWTH FACTOR INTRACELLULAR BINDING AFGF INTRACELLULAR BINDING FGF 1 INTRACELLULAR BINDING
ENSMUSG00000020076	-0.86809	0.00428323	0.0537115	Ddx50	NUCLEOLAR RNA HELICASE 2 EC_3.6.4.13 DEAD BOX 21 GU ALPHA NUCLEOLAR RNA HELICASE GU NUCLEOLAR RNA HELICASE II RH II/GU
ENSMUSG00000071041	-0.868423	0.0034449	0.0455286	Gm15210
ENSMUSG00000041625	-0.868965	0.00389152	0.0499948	Ggact	GAMMA GLUTAMYLAMINECYCLOTRANSFERASE GGACT EC_2.3.2.4 AIG2 DOMAIN CONTAINING 1 GAMMA GLUTAMYLAMINE CYCLOTRANSFERASE
ENSMUSG00000027478	-0.870998	0.00457919	0.0563449	Dnmt3b	DNA CYTOSINE 5 METHYLTRANSFERASE EC_2.1.1.37 DNA METHYLTRANSFERASE DNA MTASE M
ENSMUSG00000063406	-0.872257	0.00392731	0.0503807	Tmed5	TRANSMEMBRANE EMP24 DOMAIN CONTAINING PRECURSOR P24 FAMILY GAMMA
ENSMUSG00000089682	-0.872444	0.00728647	0.0792116	Bcl2l2	POLYADENYLATE BINDING 2 PABP 2 POLY A BINDING 2 NUCLEAR POLY A BINDING 1 POLY A BINDING II PABII POLYADENYLATE BINDING NUCLEAR 1
ENSMUSG00000025607	-0.873709	0.00773685	0.0828509	Copg2	COATOMER SUBUNIT GAMMA GAMMA COAT GAMMA COP
ENSMUSG00000024120	-0.875105	0.00891996	0.0917937	Lrpprc	LEUCINE RICH PPR MOTIF CONTAINING PROTEIN MITOCHONDRIAL PRECURSOR 130 KDA LEUCINE RICH LRP 130
ENSMUSG00000020246	-0.875708	0.00325145	0.0434828	Hcfc2	HOST CELL FACTOR 1 HCF HCF 1 C1 FACTOR [CONTAINS HCF N TERMINAL CHAIN 1; HCF N TERMINAL CHAIN 2; HCF N TERMINAL CHAIN 3; HCF N TERMINAL CHAIN 4; HCF N TERMINAL CHAIN 5; HCF N TERMINAL CHAIN 6; HCF C TERMINAL CHAIN 1; HCF C TERMINAL CHAIN 2; HCF C TERMINAL
ENSMUSG00000000804	-0.87618	0.00690875	0.0759196	Usp32	UBIQUITIN CARBOXYL TERMINAL HYDROLASE EC_3.4.19.12 DEUBIQUITINATING ENZYME UBIQUITIN THIOESTERASE UBIQUITIN SPECIFIC PROCESSING PROTEASE
ENSMUSG00000031399	-0.876413	0.00456525	0.0562064	Fam3a	PRECURSOR
ENSMUSG00000028933	-0.878001	0.00677503	0.0747677	Xrcc2	DNA REPAIR XRCC2 X RAY REPAIR CROSS COMPLEMENTING 2
ENSMUSG00000081669	-0.879638	0.00321928	0.0430989	Npm3-ps1
ENSMUSG00000072940	-0.879971	0.00276435	0.03872	Gm10443
ENSMUSG00000013846	-0.88123	0.00110976	0.019372	St3gal1	CMP N ACETYLNEURAMINATE BETA GALACTOSAMIDE ALPHA 2 3 SIALYLTRANSFERASE 1 ALPHA 2 3 ST 1 BETA GALACTOSIDE ALPHA 2 3 SIALYLTRANSFERASE 1 EC_2.4.99.4 GAL NAC6S GAL BETA 1 3 GALNAC ALPHA 2 3 SIALYLTRANSFERASE ST3GAL I ST3GALI ST3GALA 1 ST3O SIALYLTRANSFERASE
ENSMUSG00000021371	-0.881661	0.00876572	0.090669	Mcur1	MITOCHONDRIAL CALCIUM UNIPORTER REGULATOR 1 COILED COIL DOMAIN CONTAINING 90A MITOCHONDRIAL
ENSMUSG00000059119	-0.883721	0.00410379	0.0521598	Nap1l4	NUCLEOSOME ASSEMBLY 1
ENSMUSG00000035228	-0.883874	0.00641176	0.0720012	Ccdc106	COILED COIL DOMAIN CONTAINING 106
ENSMUSG00000040818	-0.884854	0.00627472	0.0708263	Dennd6a	DENN DOMAIN CONTAINING
ENSMUSG00000041974	-0.886592	0.0040193	0.0512349	2310008H04Rik	UNCHARACTERIZED
ENSMUSG00000004266	-0.889199	0.00714687	0.07805	Ptpn6	TYROSINE PHOSPHATASE NON RECEPTOR TYPE 11 EC_3.1.3.48 TYROSINE PHOSPHATASE SH PTP2 SHP 2 SHP2
ENSMUSG00000034744	-0.890044	0.00186197	0.0289234	Nagk	N ACETYL D GLUCOSAMINE KINASE N ACETYLGLUCOSAMINE KINASE EC_2.7.1.59 GLCNAC KINASE
ENSMUSG00000019461	-0.89133	0.00146461	0.0239573	Plscr3	PHOSPHOLIPID SCRAMBLASE PL SCRAMBLASE CA 2+ DEPENDENT PHOSPHOLIPID SCRAMBLASE
ENSMUSG00000033760	-0.892511	0.00419845	0.0529267	Rbm4b	RNA BINDING RNA BINDING MOTIF RNA BINDING MOTIF
ENSMUSG00000078153	-0.892973	0.00585459	0.0673373	Psme2b-ps	PROTEASOME ACTIVATOR COMPLEX SUBUNIT 11S REGULATOR COMPLEX SUBUNIT REG ACTIVATOR OF MULTICATALYTIC PROTEASE SUBUNIT PROTEASOME ACTIVATOR 28 SUBUNIT
ENSMUSG00000027496	-0.893081	0.00677799	0.0747689	Aurka	AURORA KINASE EC_2.7.11.1 AURORA/IPL1 RELATED KINASE ARK AURORA RELATED KINASE 1 SERINE/THREONINE KINASE SERINE/THREONINE KINASE AURORA
ENSMUSG00000039345	-0.893375	0.00458799	0.0564267	Mettl22	METHYLTRANSFERASE 22 EC_2.1.1.-
ENSMUSG00000090610	-0.895386	0.00636019	0.0715139	Gm3571
ENSMUSG00000000441	-0.897806	0.00294259	0.0403755	Raf1	SERINE/THREONINE KINASE EC_2.7.11.1 PROTO ONCOGENE RAF
ENSMUSG00000048796	-0.899811	0.00425493	0.0534332	Cyb561d1	CYTOCHROME B561 DOMAIN CONTAINING
ENSMUSG00000040044	-0.900422	0.00856088	0.089148	Orc3	ORIGIN RECOGNITION COMPLEX SUBUNIT 3 ORIGIN RECOGNITION COMPLEX SUBUNIT LATHEO
ENSMUSG00000039501	-0.900586	0.00610727	0.0694143	Znfx1	NFX1 TYPE ZINC FINGER CONTAINING 1
ENSMUSG00000025135	-0.900656	0.00494104	0.0596772	Anapc11	ANAPHASE PROMOTING COMPLEX SUBUNIT 11 APC11 CYCLOSOME SUBUNIT 11
ENSMUSG00000019338	-0.90288	0.00231275	0.0341648	Zfp687	ZINC FINGER
ENSMUSG00000087107	-0.903131	0.0046995	0.0575283	AI662270
ENSMUSG00000031652	-0.90324	0.00484973	0.0588701	N4bp1	NEDD4 BINDING 1 N4BP1
ENSMUSG00000039242	-0.904911	0.00401592	0.0512192	B3galnt2	UDP GALNAC:BETA 1 3 N ACETYLGALACTOSAMINYLTRANSFERASE 2 BETA 1 3 GALNAC T2 EC_2.4.1.- BETA 1 3 N ACETYLGALACTOSAMINYLTRANSFERASE II
ENSMUSG00000002668	-0.906083	0.00276854	0.0387581	Dennd1c	DENN DOMAIN CONTAINING CONNECDENN
ENSMUSG00000020437	-0.906258	0.00420542	0.052989	Myo1g	UNCONVENTIONAL MYOSIN
ENSMUSG00000017548	-0.907381	0.00718594	0.0784113	Suz12	POLYCOMB SUZ12 SUPPRESSOR OF ZESTE 12 HOMOLOG
ENSMUSG00000031371	-0.907415	0.0083016	0.0870759	Haus7	HAUS AUGMIN COMPLEX SUBUNIT 7 26S PROTEASOME ASSOCIATED UCH37 INTERACTING 1 UCHL5 INTERACTING
ENSMUSG00000057788	-0.90847	0.00524479	0.0621435	Ddx49	ATP DEPENDENT RNA HELICASE DBP8 EC_3.6.4.13
ENSMUSG00000024219	-0.910276	0.00714482	0.07805	Anks1	ANKYRIN REPEAT AND STERILE ALPHA MOTIF DOMAIN CONTAINING 1B AMYLOID BETA INTRACELLULAR DOMAIN ASSOCIATED 1 AIDA 1 E2A PBX1 ASSOCIATED EB 1
ENSMUSG00000089917	-0.910595	0.00282812	0.0392776	Uckl1	URIDINE KINASE
ENSMUSG00000014668	-0.911216	0.00256284	0.0367817	Chfr	E3 UBIQUITIN LIGASE CHFR EC_6.3.2.- CHECKPOINT WITH FORKHEAD AND RING FINGER DOMAINS
ENSMUSG00000081111	-0.911833	0.00501396	0.0602802	Gm5913
ENSMUSG00000037020	-0.912393	0.00803917	0.0850019	Wdr62	MITOGEN ACTIVATED KINASE BINDING 1
ENSMUSG00000044224	-0.912723	0.00267744	0.0378465	Dnajc21	DNAJ HOMOLOG SUBFAMILY C MEMBER 21 DNAJ HOMOLOG SUBFAMILY A MEMBER 5
ENSMUSG00000082478	-0.914258	0.00442938	0.0549232	Gm11619
ENSMUSG00000045948	-0.914469	0.00231998	0.0342331	Mrps12	28S RIBOSOMAL S12 MITOCHONDRIAL PRECURSOR MRP S12 S12MT MT RPS12
ENSMUSG00000022064	-0.916011	0.00415559	0.052614	Pibf1	KRUEPPEL FACTOR 5 BASIC TRANSCRIPTION ELEMENT BINDING 2 BTE BINDING 2 INTESTINAL ENRICHED KRUEPPEL FACTOR TRANSCRIPTION FACTOR BTEB2
ENSMUSG00000028693	-0.916379	0.00584675	0.0673288	Nasp	NUCLEAR AUTOANTIGENIC SPERM NASP
ENSMUSG00000036672	-0.916662	0.00717353	0.0783085	Cenpt	CENTROMERE T CENP T
ENSMUSG00000014850	-0.916944	0.00956475	0.0966091	Msh3	DNA MISMATCH REPAIR MSH3 MUTS HOMOLOG 3
ENSMUSG00000024892	-0.917681	0.00344342	0.0455286	Pcx	PYRUVATE CARBOXYLASE EC_6.4.1.1 PYRUVIC CARBOXYLASE PCB
ENSMUSG00000017858	-0.919328	0.00673445	0.0744139	Ift52	INTRAFLAGELLAR TRANSPORT 52 HOMOLOG NGD5
ENSMUSG00000022831	-0.919558	0.00212022	0.0319322	Hcls1	HEMATOPOIETIC LINEAGE CELL SPECIFIC HEMATOPOIETIC CELL SPECIFIC LYN SUBSTRATE 1 LCKBP1
ENSMUSG00000025512	-0.920499	0.00370104	0.0482091	Chid1	CHITINASE DOMAIN CONTAINING 1 PRECURSOR
ENSMUSG00000028015	-0.92141	0.00493938	0.0596772	Ctso	CATHEPSIN O PRECURSOR EC_3.4.22.42
ENSMUSG00000020739	-0.921515	0.00691415	0.0759196	Nup85	NUCLEAR PORE COMPLEX NUP85.85 KDA NUCLEOPORIN NUCLEOPORIN NUP85
ENSMUSG00000025001	-0.923796	0.00222018	0.0330582	Hells	SPECIFIC HELICASE EC_3.6.4.- PROLIFERATION ASSOCIATED SNF2
ENSMUSG00000024818	-0.924526	0.00807814	0.0853068	Slc25a45	SOLUTE CARRIER FAMILY 25 MEMBER 47 HEPATOCELLULAR CARCINOMA DOWN REGULATED MITOCHONDRIAL CARRIER
ENSMUSG00000090674	-0.926215	0.00592154	0.0677438	Gm17082
ENSMUSG00000046380	-0.926543	0.00664082	0.0737531	Jrk	TIGGER TRANSPOSABLE ELEMENT DERIVED
ENSMUSG00000082433	-0.927459	0.00705377	0.077194	Gm9025
ENSMUSG00000042426	-0.928472	0.00653962	0.0728456	Dhx29	ATP DEPENDENT RNA HELICASE EC_3.6.4.13 DEAH BOX
ENSMUSG00000065353	-0.929589	0.00493681	0.0596772	Snora73b
ENSMUSG00000029617	-0.930039	0.00287211	0.0397622	Ccz1	VACUOLAR FUSION CCZ1 HOMOLOG
ENSMUSG00000023307	-0.930051	0.0048009	0.0584255	March5	E3 UBIQUITIN LIGASE MARCH5 EC_6.3.2.- MEMBRANE ASSOCIATED RING FINGER 5 MEMBRANE ASSOCIATED RING CH V MARCH V
ENSMUSG00000053460	-0.930381	0.00469265	0.0574712	Ggcx	VITAMIN K DEPENDENT GAMMA CARBOXYLASE EC_4.1.1.90 GAMMA GLUTAMYL CARBOXYLASE PEPTIDYL GLUTAMATE 4 CARBOXYLASE VITAMIN K GAMMA GLUTAMYL CARBOXYLASE
ENSMUSG00000015980	-0.931386	0.00132708	0.0223273	Lrrc27	LEUCINE RICH REPEAT CONTAINING 27
ENSMUSG00000032842	-0.93142	0.00642006	0.0720049	Abcc10	MULTIDRUG RESISTANCE ASSOCIATED 7 ATP BINDING CASSETTE SUB FAMILY C MEMBER 10
ENSMUSG00000034908	-0.931469	0.00432134	0.0540343	Sidt2	SID1 TRANSMEMBRANE FAMILY MEMBER PRECURSOR
ENSMUSG00000020476	-0.933082	0.00201097	0.0307331	Dbnl	DREBRIN SH3 DOMAIN CONTAINING 7
ENSMUSG00000058444	-0.934118	0.00549634	0.0642752	Map2k5	DUAL SPECIFICITY MITOGEN ACTIVATED KINASE KINASE 5 MAP KINASE KINASE 5 MAPKK 5 EC_2.7.12.2 MAPK/ERK KINASE 5 MEK 5
ENSMUSG00000044788	-0.935535	0.00291281	0.0401561	Fads6	FATTY ACID DESATURASE 6 EC_1.14.19.-
ENSMUSG00000026622	-0.935667	0.00900826	0.092376	Nek2	KINASE EC_2.7.11.1
ENSMUSG00000046909	-0.936442	0.007613	0.0818823	Tefm	TRANSCRIPTION ELONGATION FACTOR MITOCHONDRIAL PRECURSOR
ENSMUSG00000002963	-0.936445	0.00265465	0.0376915	Pnkp	BIFUNCTIONAL POLYNUCLEOTIDE PHOSPHATASE/KINASE DNA 5' KINASE/3' PHOSPHATASE POLYNUCLEOTIDE KINASE 3' PHOSPHATASE [INCLUDES POLYNUCLEOTIDE 3' PHOSPHATASE EC_3.1.3.32 2' 3' POLYNUCLEOTIDASE ; POLYNUCLEOTIDE 5' HYDROXYL KINASE EC_2.7.1.- 78 ]
ENSMUSG00000081405	-0.937669	0.00899333	0.0923313	Gm13142
ENSMUSG00000028820	-0.940126	0.00530384	0.062645	Sfpq	AMBIGUOUS
ENSMUSG00000005687	-0.941373	0.0025125	0.0363578	Bcas2	PRE SPLICING FACTOR SPF27 BREAST CARCINOMA AMPLIFIED SEQUENCE 2 DNA AMPLIFIED IN MAMMARY CARCINOMA 1
ENSMUSG00000007646	-0.941765	0.00792814	0.0841294	Rad51c	DNA REPAIR RAD51 HOMOLOG 3 RAD51 HOMOLOG C RAD51 2
ENSMUSG00000029826	-0.94299	0.00710686	0.0777102	Zc3hav1	ZINC FINGER CCCH TYPE ANTIVIRAL 1 ADP RIBOSYLTRANSFERASE DIPHTHERIA TOXIN 13 ARTD13 ZINC FINGER ANTIVIRAL ZAP
ENSMUSG00000052533	-0.943378	0.00385079	0.0496271	Nup188	NUCLEOPORIN NUP188 HOMOLOG
ENSMUSG00000017765	-0.944177	0.00142108	0.0233912	Slc12a4	SOLUTE CARRIER FAMILY 12 MEMBER ELECTRONEUTRAL POTASSIUM CHLORIDE COTRANSPORTER K CL COTRANSPORTER
ENSMUSG00000026519	-0.944518	0.0010986	0.0192275	Tmem63a	TRANSMEMBRANE
ENSMUSG00000020697	-0.944645	0.00523134	0.0620683	Lig3	DNA LIGASE 3 EC_6.5.1.1 DNA LIGASE III POLYDEOXYRIBONUCLEOTIDE SYNTHASE [ATP] 3
ENSMUSG00000028245	-0.945593	0.00495517	0.0598202	Nsmaf	FAN FACTOR ASSOCIATED WITH NEUTRAL SPHINGOMYELINASE ACTIVATION FACTOR ASSOCIATED WITH N SMASE ACTIVATION
ENSMUSG00000027368	-0.945707	0.000636058	0.0125588	Dusp2	DUAL SPECIFICITY PHOSPHATASE EC_3.1.3.16 EC_3.1.3.- 48 MITOGEN ACTIVATED KINASE PHOSPHATASE MAP KINASE PHOSPHATASE MKP
ENSMUSG00000030649	-0.947545	0.00490306	0.05941	Anapc15	ANAPHASE PROMOTING COMPLEX SUBUNIT 15 APC15
ENSMUSG00000019952	-0.947739	0.00483072	0.0586961	Poc1b	POC1 CENTRIOLAR HOMOLOG WD REPEAT
ENSMUSG00000049401	-0.949936	0.00161676	0.0258771	Ogfr	OPIOID GROWTH FACTOR RECEPTOR OGFR ZETA TYPE OPIOID RECEPTOR
ENSMUSG00000031536	-0.950004	0.00868025	0.0900692	Polb	DNA POLYMERASE BETA EC_2.7.7.7 EC_4.2.99.-
ENSMUSG00000081118	-0.950019	0.00474022	0.0579251	Gm6758
ENSMUSG00000021948	-0.950227	0.00260957	0.0371979	Prkcd	KINASE C TYPE EC_2.7.11.13 NPKC
ENSMUSG00000005506	-0.95104	0.00241824	0.0352393	Celf1	CUGBP ELAV FAMILY MEMBER 2 CELF 2 BRUNO 3 CUG TRIPLET REPEAT RNA BINDING 2 CUG BP2 CUG BP AND ETR 3 FACTOR 2 ELAV TYPE RNA BINDING 3 ETR 3 RNA BINDING BRUNOL 3
ENSMUSG00000072621	-0.951202	0.00413948	0.0524607	Slfn10-ps
ENSMUSG00000042389	-0.951604	0.00830212	0.0870759	Tsen2	TRNA SPLICING ENDONUCLEASE SUBUNIT SEN2 EC_3.1.27.9 TRNA INTRON ENDONUCLEASE SEN2
ENSMUSG00000037134	-0.952831	0.00292292	0.0401974	Prmt10	ARGININE N METHYLTRANSFERASE 10 EC_2.1.1.-
ENSMUSG00000026618	-0.952953	0.00343549	0.045473	Iars2	ISOLEUCINE TRNA LIGASE MITOCHONDRIAL EC_6.1.1.5 ISOLEUCYL TRNA SYNTHETASE ILERS
ENSMUSG00000040359	-0.953985	0.00151236	0.0246155	Ufl1	E3 UFM1 LIGASE 1 EC_6.3.2.-
ENSMUSG00000056228	-0.954054	0.00379088	0.0490141	Cars2	CYSTEINE TRNA LIGASE MITOCHONDRIAL PRECURSOR EC_6.1.1.16 CYSTEINYL TRNA SYNTHETASE CYSRS
ENSMUSG00000082253	-0.95525	0.00504525	0.0604899	Gm14639
ENSMUSG00000031093	-0.955519	0.00439326	0.0546469	Dock11	DEDICATOR OF CYTOKINESIS CDC42 GUANINE NUCLEOTIDE EXCHANGE FACTOR ZIZIMIN
ENSMUSG00000025332	-0.955749	0.00254537	0.0366716	Kdm5c	LYSINE SPECIFIC DEMETHYLASE EC_1.14.11.- HISTONE DEMETHYLASE JUMONJI/ARID DOMAIN CONTAINING
ENSMUSG00000033335	-0.955906	0.00117318	0.0203183	Dnm2	DYNAMIN EC_3.6.5.5
ENSMUSG00000024925	-0.957515	0.00520477	0.061809	Rnaseh2c	RIBONUCLEASE H2 SUBUNIT C RNASE H2 SUBUNIT C RIBONUCLEASE HI SUBUNIT C
ENSMUSG00000089999	-0.95753	0.000984854	0.0177484	Gm6485
ENSMUSG00000040725	-0.958244	0.0047526	0.0580158	Hnrnpul1	HETEROGENEOUS NUCLEAR RIBONUCLEOPROTEIN U SCAFFOLD ATTACHMENT FACTOR SAF
ENSMUSG00000039615	-0.958869	0.00132012	0.0222891	Stub1	STIP1 HOMOLOGY AND U BOX CONTAINING 1
ENSMUSG00000026970	-0.959879	0.000600564	0.0120026	Rbms1	RNA BINDING MOTIF SINGLE STRANDED INTERACTING
ENSMUSG00000022295	-0.960799	0.00280916	0.0390764	Atp6v1c1	V TYPE PROTON ATPASE SUBUNIT C V ATPASE SUBUNIT C VACUOLAR PROTON PUMP SUBUNIT C
ENSMUSG00000030337	-0.962721	0.00423221	0.0531733	Vamp1	VESICLE ASSOCIATED MEMBRANE 2 VAMP 2 SYNAPTOBREVIN 2
ENSMUSG00000047454	-0.963437	0.0055934	0.0651418	Gphn	MOLYBDOPTERIN ADENYLYLTRANSFERASE MPT ADENYLYLTRANSFERASE EC_2.7.7.75 DOMAIN G ; MOLYBDOPTERIN MOLYBDENUMTRANSFERASE MPT MO TRANSFERASE EC_2.10.1.- 1 DOMAIN E ]
ENSMUSG00000037426	-0.963953	0.00294054	0.0403685	Depdc5	DEP DOMAIN CONTAINING 5
ENSMUSG00000034544	-0.964411	0.00660922	0.0734947	Rsrc1	SERINE/ARGININE RELATED 53 SRRP53 ARGININE/SERINE RICH COILED COIL 1
ENSMUSG00000022023	-0.966928	0.00254882	0.036681	Wbp4	WW DOMAIN BINDING 4 WBP 4 FORMIN BINDING 21 WW DOMAIN CONTAINING BINDING 4
ENSMUSG00000028066	-0.967433	0.0069128	0.0759196	Pmf1	POLYAMINE MODULATED FACTOR 1 PMF 1
ENSMUSG00000019791	-0.967832	0.00100968	0.0180716	Hint3	HISTIDINE TRIAD NUCLEOTIDE BINDING 3 HINT 3 EC 3
ENSMUSG00000012076	-0.96784	0.00514905	0.0614187	Brms1l	BREAST CANCER METASTASIS SUPPRESSOR 1
ENSMUSG00000042790	-0.968015	0.00215393	0.0322364	Rnf214	RING FINGER 214
ENSMUSG00000032783	-0.970246	0.00449106	0.0555478	Troap	TASTIN TROPHININ ASSISTING TROPHININ ASSOCIATED
ENSMUSG00000091401	-0.97028	0.0015444	0.0249819	Gm9252
ENSMUSG00000039686	-0.970917	0.0035843	0.0469919	Zer1	ZER 1 HOMOLOG ZYG 11 HOMOLOG B
ENSMUSG00000083844	-0.971183	0.0016625	0.0264839	2210015D19Rik
ENSMUSG00000028292	-0.971373	0.00625699	0.0707175	Rars2	ARGININE TRNA LIGASE EC_6.1.1.19 ARGINYL TRNA SYNTHETASE ARGRS
ENSMUSG00000025007	-0.971674	0.00212142	0.0319322	Aldh18a1	DELTA 1 PYRROLINE 5 CARBOXYLATE SYNTHASE P5CS ALDEHYDE DEHYDROGENASE FAMILY 18 MEMBER A1 [INCLUDES GLUTAMATE 5 KINASE GK EC_2.7.2.11 GAMMA GLUTAMYL KINASE ; GAMMA GLUTAMYL PHOSPHATE REDUCTASE GPR EC_1.2.1.- 41 GLUTAMATE 5 SEMIALDEHYDE DEHYDROGENASE GLUTAM
ENSMUSG00000034848	-0.972691	0.00604452	0.0688503	Ttc21b	TETRATRICOPEPTIDE REPEAT TPR REPEAT
ENSMUSG00000027010	-0.974055	0.00189388	0.0292976	Slc25a12	CALCIUM BINDING MITOCHONDRIAL CARRIER MITOCHONDRIAL ASPARTATE GLUTAMATE CARRIER SOLUTE CARRIER FAMILY 25 MEMBER
ENSMUSG00000026116	-0.974193	0.00436672	0.05442	Tmem131	TRANSMEMBRANE 131
ENSMUSG00000006395	-0.974581	0.00368824	0.0480901	Hyi
ENSMUSG00000031537	-0.975014	0.00250097	0.0362166	Ikbkb	INHIBITOR OF NUCLEAR FACTOR KAPPA B KINASE SUBUNIT ALPHA I KAPPA B KINASE ALPHA IKK A IKK ALPHA IKBKA IKAPPAB KINASE EC_2.7.11.10 CONSERVED HELIX LOOP HELIX UBIQUITOUS KINASE NUCLEAR FACTOR NF KAPPA B INHIBITOR KINASE ALPHA NFKBIKA
ENSMUSG00000070610	-0.97569	0.00314825	0.0424641	Gm13127
ENSMUSG00000045795	-0.975847	0.00303067	0.0413246	Whamm	WASP HOMOLOG ASSOCIATED WITH ACTIN MEMBRANES AND MICROTUBULES WAS HOMOLOGY REGION 2 DOMAIN CONTAINING 1 WH2 DOMAIN CONTAINING 1
ENSMUSG00000058594	-0.976159	0.00212995	0.0319876	Fbxo18	F BOX ONLY 18 EC_3.6.4.12 F BOX DNA HELICASE 1
ENSMUSG00000056216	-0.977157	0.0013235	0.0223031	Cebpg	CCAAT/ENHANCER BINDING GAMMA C/EBP GAMMA
ENSMUSG00000027201	-0.97785	0.00256741	0.0368271	Myef2	MYELIN EXPRESSION FACTOR 2 MEF 2 MYEF 2
ENSMUSG00000071573	-0.97882	0.00635934	0.0715139	Rnls	RENALASE PRECURSOR EC_1.4.-.- MONOAMINE OXIDASE C MAO C
ENSMUSG00000029433	-0.978921	0.00148672	0.0242584	Diablo	DIABLO HOMOLOG MITOCHONDRIAL PRECURSOR DIRECT IAP BINDING WITH LOW PI SECOND MITOCHONDRIA DERIVED ACTIVATOR OF CASPASE SMAC
ENSMUSG00000042854	-0.979227	0.00844221	0.0881574	Trp53rk	TP53 REGULATING KINASE EC_2.7.11.1 NORI 2 P53 RELATED KINASE
ENSMUSG00000000934	-0.979846	0.00238493	0.0349142	Top1mt	DNA TOPOISOMERASE 1 EC_5.99.1.2 DNA TOPOISOMERASE I
ENSMUSG00000002319	-0.979873	0.00411859	0.0523225	Ipo4	IMPORTIN 4 IMP4 IMPORTIN RAN BINDING 4 RANBP4
ENSMUSG00000029404	-0.980322	0.0021195	0.0319322	Arl6ip4	ADP RIBOSYLATION FACTOR 6 INTERACTING 4 ARL 6 INTERACTING 4 AIP 4
ENSMUSG00000031821	-0.981153	0.00588034	0.0675081	Gins2	DNA REPLICATION COMPLEX GINS PSF2 GINS COMPLEX SUBUNIT 2
ENSMUSG00000075555	-0.981264	0.0074198	0.0802618	Gm10863
ENSMUSG00000038416	-0.981551	0.00215237	0.0322315	Cdc16	CELL DIVISION CYCLE 16 HOMOLOG ANAPHASE PROMOTING COMPLEX SUBUNIT 6 APC6 CYCLOSOME SUBUNIT 6
ENSMUSG00000022842	-0.982659	0.00238611	0.0349142	Ece2	ENDOTHELIN CONVERTING ENZYME
ENSMUSG00000019942	-0.982877	0.00631744	0.0711859	Cdk1	CYCLIN DEPENDENT KINASE 1 CDK1 EC_2.7.11.22 EC_2.7.11.- 23 CELL DIVISION CONTROL 2 HOMOLOG CELL DIVISION KINASE 1 P34 KINASE
ENSMUSG00000020263	-0.984016	0.00447523	0.0554037	Appl2	DCC INTERACTING 13 DIP13 ADAPTER CONTAINING PH DOMAIN PTB DOMAIN AND LEUCINE ZIPPER MOTIF
ENSMUSG00000004789	-0.984547	0.00201869	0.0308133	Dlst	DIHYDROLIPOYLLYSINE RESIDUE SUCCINYLTRANSFERASE COMPONENT OF 2 OXOGLUTARATE DEHYDROGENASE COMPLEX MITOCHONDRIAL PRECURSOR EC_2.3.1.61 2 OXOGLUTARATE DEHYDROGENASE COMPLEX COMPONENT E2 OGDC E2 DIHYDROLIPOAMIDE SUCCINYLTRANSFERASE COMPONENT OF 2 OXOGLUTARAT
ENSMUSG00000070003	-0.985283	0.00368413	0.0480604	Ssbp4	SINGLE STRANDED DNA BINDING SEQUENCE SPECIFIC SINGLE STRANDED DNA BINDING
ENSMUSG00000028127	-0.985493	0.0020814	0.0314199	Abcd3	ATP BINDING CASSETTE SUB FAMILY D MEMBER
ENSMUSG00000026754	-0.986385	0.00538925	0.0634807	Golga1	GOLGIN SUBFAMILY A MEMBER 1 GOLGIN 97
ENSMUSG00000034329	-0.987128	0.00633499	0.0713223	Brip1	FANCONI ANEMIA GROUP J FACJ EC_3.6.4.13 ATP DEPENDENT RNA HELICASE BRIP1 BRCA1 ASSOCIATED C TERMINAL HELICASE 1 BRCA1 INTERACTING C TERMINAL HELICASE 1 BRCA1 INTERACTING 1
ENSMUSG00000074800	-0.987737	0.000946399	0.0171734	Gm4149
ENSMUSG00000071451	-0.990526	0.00212998	0.0319876	Psmg4	PROTEASOME ASSEMBLY CHAPERONE 4 PAC 4
ENSMUSG00000095159	-0.991209	0.00170757	0.0269887	Tubb4b-ps1	TUBULIN BETA CHAIN
ENSMUSG00000030275	-0.991438	0.00418328	0.052837	Etnk1	ETHANOLAMINE KINASE 2 EKI 2 EC_2.7.1.82 ETHANOLAMINE KINASE
ENSMUSG00000037458	-0.991571	0.000612011	0.0121965	Azin1	ORNITHINE DECARBOXYLASE ODC EC_4.1.1.17
ENSMUSG00000023764	-0.992307	0.00261436	0.0372157	Sfi1	SFI1 HOMOLOG
ENSMUSG00000033653	-0.993891	0.00141393	0.0233321	Vps8	VACUOLAR SORTING ASSOCIATED 8 HOMOLOG
ENSMUSG00000021193	-0.994301	0.00238044	0.0348702	Pitrm1	PRESEQUENCE PROTEASE EC_3.4.24.-
ENSMUSG00000027469	-0.994503	0.00878802	0.090828	Tpx2	TARGETING XKLP2
ENSMUSG00000034484	-0.994812	0.000838423	0.0156519	Snx2	SORTING NEXIN
ENSMUSG00000021357	-0.99488	0.00201889	0.0308133	Exoc2	EXOCYST COMPLEX COMPONENT 2 EXOCYST COMPLEX COMPONENT SEC5
ENSMUSG00000026158	-0.995264	0.00381323	0.0492545	Ogfrl1	OPIOID GROWTH FACTOR RECEPTOR OGFR ZETA TYPE OPIOID RECEPTOR
ENSMUSG00000039623	-0.99527	0.00122374	0.0209723	Ap5z1	AP 5 COMPLEX SUBUNIT ZETA 1 ADAPTER RELATED COMPLEX 5 ZETA SUBUNIT ZETA5
ENSMUSG00000052825	-0.995481	0.00185751	0.0288712	Gm9892
ENSMUSG00000028923	-0.997284	0.000900571	0.0165711	Necap2	ADAPTIN EAR BINDING COAT ASSOCIATED 1 NECAP ENDOCYTOSIS ASSOCIATED 1 NECAP 1
ENSMUSG00000024397	-0.997326	0.00511589	0.0611134	Aif1	ALLOGRAFT INFLAMMATORY FACTOR 1 IONIZED CALCIUM BINDING ADAPTER MOLECULE
ENSMUSG00000026307	-0.997749	0.00253158	0.0364976	Scly	SELENOCYSTEINE LYASE EC_4.4.1.16
ENSMUSG00000024312	-0.998233	0.00205176	0.0311159	Wdr46	U3 SMALL NUCLEOLAR RNA ASSOCIATED 7 U3 SNORNA ASSOCIATED 7 U THREE 7
ENSMUSG00000084348	-0.998299	0.00288026	0.039791	Gm14608
ENSMUSG00000009079	-0.99844	0.00266743	0.0377931	Ewsr1	RNA BINDING EWS
ENSMUSG00000090197	-0.999624	0.000774614	0.0147717	Dnaja1-ps
ENSMUSG00000035310	-0.999851	0.00412597	0.052345	Lin54	LIN 54 HOMOLOG
ENSMUSG00000032590	-0.999947	0.00148411	0.0242367	Apeh	ACYLAMINO ACID RELEASING ENZYME AARE EC_3.4.19.1 ACYL PEPTIDE HYDROLASE APH ACYLAMINOACYL PEPTIDASE
ENSMUSG00000060216	-1.00143	0.0012617	0.0214408	Arrb2	ARRESTIN
ENSMUSG00000074236	-1.00338	0.00139643	0.0231306	Gm9387
ENSMUSG00000030871	-1.00377	0.00292631	0.0402153	Ears2	PROBABLE GLUTAMATE TRNA LIGASE MITOCHONDRIAL PRECURSOR EC_6.1.1.17 GLUTAMYL TRNA SYNTHETASE GLURS
ENSMUSG00000037313	-1.00468	0.00343294	0.045473	Tacc3	TRANSFORMING ACIDIC COILED COIL CONTAINING 3
ENSMUSG00000034453	-1.00542	0.00247216	0.0358928	Polr3b	DNA DIRECTED RNA POLYMERASE III SUBUNIT RPC2 RNA POLYMERASE III SUBUNIT C2 EC_2.7.7.6 C128 DNA DIRECTED RNA POLYMERASE III 127.6 KDA POLYPEPTIDE DNA DIRECTED RNA POLYMERASE III SUBUNIT B
ENSMUSG00000042606	-1.00555	0.00450779	0.0556754	Hirip3	HIRA INTERACTING 3
ENSMUSG00000036890	-1.00591	0.00194186	0.0298812	Gtdc1	GLYCOSYLTRANSFERASE DOMAIN CONTAINING 1
ENSMUSG00000062093	-1.00703	0.00188714	0.0292451	Gm10110	POLYADENYLATE BINDING PROTEIN CYTOPLASMIC AND NUCLEAR PABP POLY A BINDING POLYADENYLATE TAIL BINDING
ENSMUSG00000041360	-1.00712	0.0029227	0.0401974	D19Bwg1357e	PUMILIO DOMAIN CONTAINING
ENSMUSG00000074649	-1.00739	0.00217339	0.0324569	BC029722
ENSMUSG00000024556	-1.00771	0.00145251	0.0238337	Me2	NADP DEPENDENT MALIC ENZYME NADP ME EC_1.1.1.40 MALIC ENZYME
ENSMUSG00000082674	-1.00837	0.0050363	0.0604608	Gm11914
ENSMUSG00000089817	-1.00846	0.0030938	0.041859	Gm7162
ENSMUSG00000022439	-1.00949	0.00108734	0.0190837	Parvg	PARVIN
ENSMUSG00000078570	-1.01119	0.00409527	0.0520766	1110065P20Rik	UNCHARACTERIZED
ENSMUSG00000083826	-1.01133	0.00120935	0.0207665	Gm13039
ENSMUSG00000057411	-1.01151	0.00123154	0.021051	Fam173a	UNKNOWN
ENSMUSG00000042182	-1.0116	0.00355794	0.0466931	Bend6	BEN DOMAIN CONTAINING 6
ENSMUSG00000027253	-1.01177	0.000997297	0.0179307	Lrp4	LOW DENSITY LIPOPROTEIN RECEPTOR RELATED 4 PRECURSOR LRP 4 MULTIPLE EPIDERMAL GROWTH FACTOR DOMAINS 7
ENSMUSG00000021311	-1.01259	0.00470798	0.0576052	Mtr	METHIONINE SYNTHASE EC_2.1.1.13 5 METHYLTETRAHYDROFOLATE HOMOCYSTEINE METHYLTRANSFERASE VITAMIN B12 DEPENDENT METHIONINE SYNTHASE MS
ENSMUSG00000022559	-1.01309	0.000844566	0.0157171	Fbxl6	F BOX/LRR REPEAT 6 F BOX AND LEUCINE RICH REPEAT 6 F BOX FBL6
ENSMUSG00000081557	-1.01321	0.00952504	0.0963565	Gm5697
ENSMUSG00000040040	-1.01337	0.00874667	0.0906149	Ift88	INTRAFLAGELLAR TRANSPORT 88 HOMOLOG RECESSIVE POLYCYSTIC KIDNEY DISEASE TG737 TETRATRICOPEPTIDE REPEAT 10 TPR REPEAT 10
ENSMUSG00000042410	-1.0135	0.00202332	0.030845	Agps	ALKYLDIHYDROXYACETONEPHOSPHATE SYNTHASE ALKYL DHAP SYNTHASE EC_2.5.1.26 ALKYLGLYCERONE PHOSPHATE SYNTHASE
ENSMUSG00000034218	-1.01363	0.00987276	0.0991094	Atm	SERINE/THREONINE KINASE TEL1 EC_2.7.11.1 ATM HOMOLOG DNA DAMAGE CHECKPOINT KINASE TEL1 TELOMERE LENGTH REGULATION 1
ENSMUSG00000019854	-1.01428	0.00229062	0.0339335	Reps1	RALBP1 ASSOCIATED EPS DOMAIN CONTAINING 1 RALBP1 INTERACTING 1
ENSMUSG00000029177	-1.0146	0.00196789	0.0301936	Cenpa	HISTONE H3 CENTROMERIC A CENTROMERE A CENP A
ENSMUSG00000031575	-1.01477	0.00166812	0.0265143	Ash2l	SET1/ASH2 HISTONE METHYLTRANSFERASE COMPLEX SUBUNIT ASH2 ASH2
ENSMUSG00000029415	-1.016	0.00204149	0.0310498	Sdad1	SDA1 HOMOLOG SDA1 DOMAIN CONTAINING 1
ENSMUSG00000020330	-1.01655	0.00733413	0.0795719	Hmmr	HYALURONAN MEDIATED MOTILITY RECEPTOR INTRACELLULAR HYALURONIC ACID BINDING RECEPTOR HYALURONAN MEDIATED MOTILITY CD168 ANTIGEN
ENSMUSG00000052926	-1.01743	0.00311548	0.0421087	Rnaseh2a	RIBONUCLEASE H2 SUBUNIT A RNASE H2 SUBUNIT A EC_3.1.26.4 RIBONUCLEASE HI LARGE SUBUNIT RNASE HI LARGE SUBUNIT RIBONUCLEASE HI SUBUNIT A
ENSMUSG00000039055	-1.01798	0.00499255	0.0600617	Eme1	CROSSOVER JUNCTION ENDONUCLEASE EME1 EC_3.1.22.-
ENSMUSG00000026019	-1.01806	0.00274292	0.0384876	Wdr12	RIBOSOME BIOGENESIS WDR12
ENSMUSG00000020534	-1.01941	0.00272793	0.0383534	Shmt1	SERINE HYDROXYMETHYLTRANSFERASE SHMT EC_2.1.2.1 GLYCINE HYDROXYMETHYLTRANSFERASE SERINE METHYLASE
ENSMUSG00000074785	-1.01956	0.00360136	0.0471685	Plxnc1	PLEXIN C1 PRECURSOR VIRUS ENCODED SEMAPHORIN RECEPTOR CD232 ANTIGEN
ENSMUSG00000025616	-1.02006	0.00158113	0.0253882	Usp16	UBIQUITIN CARBOXYL TERMINAL HYDROLASE 16 EC_3.4.19.12 DEUBIQUITINATING ENZYME 16 UBIQUITIN THIOESTERASE 16 UBIQUITIN SPECIFIC PROCESSING PROTEASE 16
ENSMUSG00000083796	-1.0221	0.00559472	0.0651418	Gm13369
ENSMUSG00000037816	-1.02257	0.0013159	0.0222608	Fbxw17	F BOX/WD REPEAT CONTAINING 12 F BOX AND WD 40 DOMAIN CONTAINING 12 F BOX ONLY 35
ENSMUSG00000026039	-1.02338	0.0097154	0.0979045	Sgol2	SHUGOSHIN 2 SHUGOSHIN 2 SGO2
ENSMUSG00000024006	-1.02375	0.00110357	0.0192782	Stk38	SERINE/THREONINE KINASE EC_2.7.11.1
ENSMUSG00000023977	-1.02412	0.000710603	0.0136879	Ubr2	E3 UBIQUITIN LIGASE UBR2 EC_6.3.2.- N RECOGNIN 2 UBIQUITIN LIGASE E3 ALPHA 2 UBIQUITIN LIGASE E3 ALPHA II
ENSMUSG00000056673	-1.0245	0.00189295	0.0292976	Kdm5d	LYSINE SPECIFIC DEMETHYLASE EC_1.14.11.- HISTONE DEMETHYLASE JUMONJI/ARID DOMAIN CONTAINING
ENSMUSG00000030882	-1.02485	0.00517137	0.0614681	Dnhd1	DYNEIN HEAVY CHAIN DOMAIN CONTAINING 1 DYNEIN HEAVY CHAIN DOMAIN 1 PROTEIN CCDC35
ENSMUSG00000001376	-1.025	0.00166963	0.0265143	Ccdc132	COILED COIL DOMAIN CONTAINING 132
ENSMUSG00000015790	-1.02594	0.00248975	0.0361082	Surf1	SURFEIT LOCUS
ENSMUSG00000057531	-1.02775	0.000766429	0.0146476	Dtnbp1	DYSBINDIN BIOGENESIS OF LYSOSOME RELATED ORGANELLES COMPLEX 1 SUBUNIT 8 BLOC 1 SUBUNIT 8 DYSBINDIN 1 DYSTROBREVIN BINDING 1
ENSMUSG00000004270	-1.03046	0.00120694	0.0207593	Lpcat3	LYSOPHOSPHOLIPID ACYLTRANSFERASE 5 LPLAT 5 EC_2.3.1.- 1 ACYLGLYCEROPHOSPHOCHOLINE O ACYLTRANSFERASE EC_2.3.1.23 1 O ACYLTRANSFERASE EC_2.3.-.- 1 N6 LYSOPHOSPHATIDYLCHOLINE ACYLTRANSFERASE LPCAT LYSO PC ACYLTRANSFERASE LYSOPHOSPHATIDYLCHOLINE ACYLTRANSFERA
ENSMUSG00000015880	-1.03129	0.00835808	0.0875578	Ncapg	CONDENSIN COMPLEX SUBUNIT 3 CHROMOSOME ASSOCIATED G CONDENSIN SUBUNIT CAP G NON SMC CONDENSIN I COMPLEX SUBUNIT G
ENSMUSG00000003423	-1.03174	0.00252432	0.0364484	Pih1d1	PIH1 DOMAIN CONTAINING 1
ENSMUSG00000081467	-1.0322	0.0025845	0.0369711	Gm13337
ENSMUSG00000025959	-1.03314	0.00234317	0.0344977	Klf7	KRUEPPEL FACTOR 6 CORE PROMOTER ELEMENT BINDING TRANSCRIPTION FACTOR ZF9
ENSMUSG00000071203	-1.03352	0.0015437	0.0249819	Naip5	BACULOVIRAL IAP REPEAT CONTAINING NEURONAL APOPTOSIS INHIBITORY
ENSMUSG00000036061	-1.03365	0.00307775	0.0417804	Smug1	SINGLE STRAND SELECTIVE MONOFUNCTIONAL URACIL DNA GLYCOSYLASE EC_3.2.2.-
ENSMUSG00000033222	-1.0342	0.00351425	0.0462586	Ttf2	TRANSCRIPTION TERMINATION FACTOR 2 EC_3.6.4.- RNA POLYMERASE II TERMINATION FACTOR TRANSCRIPTION RELEASE FACTOR 2
ENSMUSG00000084301	-1.03445	0.0079739	0.0844442	Gm7856
ENSMUSG00000040648	-1.03472	0.0019346	0.0298394	Ppip5k2	INOSITOL HEXAKISPHOSPHATE AND DIPHOSPHOINOSITOL PENTAKISPHOSPHATE KINASE 1 EC_2.7.4.21 EC_2.7.4.- 24 DIPHOSPHOINOSITOL PENTAKISPHOSPHATE KINASE 1 HISTIDINE ACID PHOSPHATASE DOMAIN CONTAINING 2A INSP6 AND PP IP5 KINASE 1
ENSMUSG00000034560	-1.03606	0.00183107	0.028511	A230046K03Rik	WASH COMPLEX SUBUNIT 7
ENSMUSG00000062031	-1.03609	0.00213787	0.0320877	Athl1	ACID TREHALASE 1 EC_3.2.1.-
ENSMUSG00000028542	-1.03609	0.00175063	0.0275364	Slc6a9	SODIUM AND CHLORIDE DEPENDENT GLYCINE TRANSPORTER GLYT SOLUTE CARRIER FAMILY 6 MEMBER
ENSMUSG00000007827	-1.0362	0.00650775	0.0726998	Ankrd26	ANKYRIN REPEAT DOMAIN CONTAINING
ENSMUSG00000030189	-1.03788	0.000829686	0.0155062	Ybx3	NUCLEASE SENSITIVE ELEMENT BINDING 1 CCAAT BINDING TRANSCRIPTION FACTOR I SUBUNIT A CBF A ENHANCER FACTOR I SUBUNIT A EFI A Y BOX TRANSCRIPTION FACTOR Y BOX BINDING 1 YB 1
ENSMUSG00000002699	-1.03885	0.00111041	0.019372	Lcp2	LYMPHOCYTE CYTOSOLIC 2 SH2 DOMAIN CONTAINING LEUKOCYTE OF 76 KDA SLP 76 TYROSINE PHOSPHOPROTEIN SLP76
ENSMUSG00000041763	-1.03908	0.00123049	0.0210467	Tpp2	TRIPEPTIDYL PEPTIDASE 2 TPP 2 EC_3.4.14.10 TRIPEPTIDYL AMINOPEPTIDASE TRIPEPTIDYL PEPTIDASE II TPP II
ENSMUSG00000027288	-1.04082	0.00125039	0.0213175	Zfp106	ZINC FINGER 106 ZFP 106 ZINC FINGER 474
ENSMUSG00000020572	-1.04104	0.000818562	0.015353	Nampt	NICOTINAMIDE PHOSPHORIBOSYLTRANSFERASE NAMPRTASE NAMPT EC_2.4.2.12 PRE B CELL COLONY ENHANCING FACTOR 1 HOMOLOG PBEF VISFATIN
ENSMUSG00000059588	-1.0412	0.00442988	0.0549232	Calcrl	CALCITONIN GENE RELATED PEPTIDE TYPE 1 RECEPTOR PRECURSOR CGRP TYPE 1 RECEPTOR CALCITONIN RECEPTOR RECEPTOR
ENSMUSG00000022369	-1.04153	0.00376908	0.0488285	Mtbp	MDM2 BINDING
ENSMUSG00000081933	-1.04232	0.00148446	0.0242367	Gm14767
ENSMUSG00000024369	-1.04431	0.00102848	0.018358	Nelfe	NEGATIVE ELONGATION FACTOR E NELF E RNA BINDING RD
ENSMUSG00000083443	-1.04503	0.000475482	0.0100464	Gm15519
ENSMUSG00000026319	-1.04556	0.00122874	0.0210443	2310035C23Rik	LISH DOMAIN AND HEAT REPEAT CONTAINING
ENSMUSG00000048261	-1.04651	0.001009	0.0180716	Gm4879
ENSMUSG00000025505	-1.04783	0.00482785	0.0586885	Tmem80	UNKNOWN
ENSMUSG00000029629	-1.04823	0.00313763	0.0423645	Phf14	PHD FINGER 14
ENSMUSG00000014601	-1.04861	0.000414483	0.00901923	Strip1	STRIATIN INTERACTING
ENSMUSG00000026111	-1.04981	0.00102499	0.0183081	Unc50	UNC 50 HOMOLOG
ENSMUSG00000089958	-1.05002	0.00138484	0.0230405	Gm16165
ENSMUSG00000024143	-1.0504	0.000254291	0.00606712	Rhoq	CELL DIVISION CONTROL 42 HOMOLOG PRECURSOR
ENSMUSG00000022035	-1.05044	0.0029915	0.0408756	Ccdc25	COILED COIL DOMAIN CONTAINING 25
ENSMUSG00000007867	-1.05104	0.00175209	0.0275429	Ift43	INTRAFLAGELLAR TRANSPORT 43 HOMOLOG
ENSMUSG00000040850	-1.0517	0.00055407	0.0113487	Psme4	PROTEASOME ACTIVATOR COMPLEX SUBUNIT 4 PROTEASOME ACTIVATOR PA200
ENSMUSG00000049230	-1.05191	0.0044911	0.0555478	Gm9833	HETEROGENEOUS NUCLEAR RIBONUCLEOPROTEIN M
ENSMUSG00000045751	-1.05221	0.00435847	0.054369	Mms22l	MMS22 METHYL METHANESULFONATE SENSITIVITY 22
ENSMUSG00000000730	-1.05472	0.00126543	0.0214901	Dnmt3l	DNA CYTOSINE 5 METHYLTRANSFERASE EC_2.1.1.37 DNA METHYLTRANSFERASE DNA MTASE M
ENSMUSG00000034601	-1.05478	0.00288887	0.039847	2700049A03Rik	TALPID3
ENSMUSG00000032026	-1.05528	0.00954938	0.0965283	Rexo2	OLIGORIBONUCLEASE MITOCHONDRIAL PRECURSOR EC_3.1.-.- RNA EXONUCLEASE 2 HOMOLOG SMALL FRAGMENT NUCLEASE
ENSMUSG00000091105	-1.05535	0.00710162	0.0776853	Gm5633
ENSMUSG00000018986	-1.05553	0.000607221	0.0121264	Slfn3	SCHLAFEN FAMILY MEMBER
ENSMUSG00000022710	-1.05573	0.00125469	0.0213493	Usp7	UBIQUITIN CARBOXYL TERMINAL HYDROLASE 7 EC_3.4.19.12 DEUBIQUITINATING ENZYME 7 UBIQUITIN THIOESTERASE 7 UBIQUITIN SPECIFIC PROCESSING PROTEASE 7
ENSMUSG00000081633	-1.05673	0.001731	0.0272768	Gm8522
ENSMUSG00000019809	-1.05715	0.00121557	0.020846	Pex3	PEROXISOMAL BIOGENESIS FACTOR 3 PEROXIN 3 PEROXISOMAL ASSEMBLY PEX3
ENSMUSG00000037580	-1.05747	0.000250709	0.00600342	Gch1	GTP CYCLOHYDROLASE 1 EC_3.5.4.16 GTP CYCLOHYDROLASE I GTP CH I
ENSMUSG00000004865	-1.05753	0.000428415	0.00926882	Srpk1	SRSF KINASE EC_2.7.11.1 KINASE SERINE/ARGININE RICH SPECIFIC KINASE SR SPECIFIC KINASE
ENSMUSG00000052085	-1.05762	0.00224744	0.0333504	Dock8	DEDICATOR OF CYTOKINESIS
ENSMUSG00000025241	-1.05829	0.00163179	0.0260898	Fyco1	FYVE AND COILED COIL DOMAIN CONTAINING 1
ENSMUSG00000000168	-1.05858	0.00159889	0.025642	Dlat	DIHYDROLIPOYLLYSINE RESIDUE ACETYLTRANSFERASE COMPONENT OF PYRUVATE DEHYDROGENASE COMPLEX MITOCHONDRIAL PRECURSOR EC_2.3.1.12.70 KDA MITOCHONDRIAL AUTOANTIGEN OF PRIMARY BILIARY CIRRHOSIS PBC DIHYDROLIPOAMIDE ACETYLTRANSFERASE COMPONENT OF PYRUVATE DEHYDR
ENSMUSG00000029063	-1.05908	0.000646792	0.0127133	Nadk	NAD KINASE EC_2.7.1.23 POLY P /ATP NAD KINASE
ENSMUSG00000002297	-1.05936	0.00394059	0.0505188	Dbf4	DBF4 HOMOLOG A
ENSMUSG00000052477	-1.0594	0.000839271	0.0156519	C130026I21Rik	AMBIGUOUS
ENSMUSG00000031328	-1.05952	0.000355531	0.00794071	Flna	FILAMIN A FLN A ACTIN BINDING 280 ABP 280 FILAMIN 1
ENSMUSG00000083338	-1.0598	0.00490914	0.0594561	Gm12475
ENSMUSG00000078786	-1.06038	0.0013196	0.0222891	BC024978	UNKNOWN
ENSMUSG00000023072	-1.0607	0.00214842	0.0322091	Cep89	CENTROSOMAL OF 89 KDA COILED COIL DOMAIN CONTAINING 123
ENSMUSG00000023940	-1.06187	0.0084606	0.0882792	Sgol1	SHUGOSHIN 1
ENSMUSG00000056267	-1.06199	0.00515799	0.0614373	Cep70	UNKNOWN
ENSMUSG00000032512	-1.06292	0.000809794	0.0152267	Wdr48	WD REPEAT CONTAINING 48
ENSMUSG00000047843	-1.06295	0.00037334	0.00828202	Bri3	BRAIN I3
ENSMUSG00000028973	-1.06375	0.000646711	0.0127133	Abcb8	ATP BINDING CASSETTE SUB FAMILY B MEMBER MITOCHONDRIAL PRECURSOR
ENSMUSG00000030802	-1.06391	0.00139497	0.0231211	Bckdk	[3 METHYL 2 OXOBUTANOATE DEHYDROGENASE [LIPOAMIDE]] KINASE MITOCHONDRIAL PRECURSOR EC_2.7.11.4 BRANCHED CHAIN ALPHA KETOACID DEHYDROGENASE KINASE BCKD KINASE BCKDHKIN
ENSMUSG00000012483	-1.06402	0.00057703	0.0116927	Rpa3	REPLICATION A 14 KDA SUBUNIT RP A P14 REPLICATION FACTOR A 3 RF A 3
ENSMUSG00000027247	-1.06492	0.00250136	0.0362166	Arhgap1	RHO GTPASE ACTIVATING RHO TYPE GTPASE ACTIVATING
ENSMUSG00000021693	-1.0661	0.00166677	0.0265143	Kif2a	KINESIN
ENSMUSG00000001105	-1.06657	0.000653362	0.0128076	Ift20	INTRAFLAGELLAR TRANSPORT 20 HOMOLOG
ENSMUSG00000022544	-1.06672	0.00177971	0.0278769	Fam86	UNKNOWN
ENSMUSG00000060098	-1.06729	0.000779256	0.014785	Prmt7	ARGININE N METHYLTRANSFERASE 7 EC_2.1.1.-
ENSMUSG00000027184	-1.06742	0.00107752	0.0189637	Caprin1	CAPRIN 1 CYTOPLASMIC ACTIVATION AND PROLIFERATION ASSOCIATED 1 GPI ANCHORED MEMBRANE 1 GPI ANCHORED P137 GPI P137 P137GPI MEMBRANE COMPONENT CHROMOSOME 11 SURFACE MARKER 1 RNA GRANULE 105
ENSMUSG00000029022	-1.06794	0.00214692	0.0322051	Miip	MIGRATION AND INVASION INHIBITORY INVASION INHIBITORY 45 IIP45
ENSMUSG00000039804	-1.06883	0.000587969	0.011823	Ncoa5	NUCLEAR RECEPTOR COACTIVATOR 5 NCOA 5 COACTIVATOR INDEPENDENT OF AF 2 CIA
ENSMUSG00000047534	-1.0696	0.00414615	0.0525199	Mis18bp1	MIS18 BINDING 1 KINETOCHORE ASSOCIATED KNL 2 HOMOLOG
ENSMUSG00000062944	-1.07023	0.00150576	0.0245538	9130023H24Rik	ZINC FINGER
ENSMUSG00000001627	-1.07144	0.000900516	0.0165711	Ifrd1	INTERFERON RELATED DEVELOPMENTAL REGULATOR 1 NERVE GROWTH FACTOR INDUCIBLE PC4
ENSMUSG00000070034	-1.07165	0.000549536	0.0113039	Sp110	SP110 NUCLEAR BODY INTRACELLULAR PATHOGEN RESISTANCE 1
ENSMUSG00000040688	-1.07227	0.000883242	0.0163556	Tbl3	TRANSDUCIN BETA 3
ENSMUSG00000052798	-1.07288	0.00298623	0.040846	Nup107	NUCLEAR PORE COMPLEX NUP107.107 KDA NUCLEOPORIN NUCLEOPORIN NUP107
ENSMUSG00000019139	-1.07297	0.0015292	0.0248587	Isyna1	INOSITOL 3 PHOSPHATE SYNTHASE 1 IPS 1 EC_5.5.1.4 MYO INOSITOL 1 PHOSPHATE SYNTHASE MI 1 P SYNTHASE MIP SYNTHASE
ENSMUSG00000038539	-1.07405	0.00688615	0.075739	Atf5	CYCLIC AMP DEPENDENT TRANSCRIPTION FACTOR ATF 5 CAMP DEPENDENT TRANSCRIPTION FACTOR ATF 5 ACTIVATING TRANSCRIPTION FACTOR 5 TRANSCRIPTION FACTOR ATFX
ENSMUSG00000036661	-1.07487	0.00498425	0.0600248	Dennd3	DENN DOMAIN CONTAINING 3
ENSMUSG00000036879	-1.07499	0.00218311	0.0325801	Phkb	PHOSPHORYLASE B KINASE REGULATORY SUBUNIT BETA PHOSPHORYLASE KINASE SUBUNIT BETA
ENSMUSG00000084018	-1.07586	0.000598235	0.0119652	Gm11895
ENSMUSG00000030801	-1.07589	0.00146235	0.0239353	Kat8	HISTONE ACETYLTRANSFERASE KAT8 EC_2.3.1.48 LYSINE ACETYLTRANSFERASE 8 MOZ YBF2/SAS3 SAS2 AND TIP60 1 MYST 1
ENSMUSG00000002205	-1.0763	0.000580928	0.0117545	Vrk3	INACTIVE SERINE/THREONINE KINASE VRK3 SERINE/THREONINE PSEUDOKINASE VRK3 VACCINIA RELATED KINASE 3
ENSMUSG00000047084	-1.07844	0.000820501	0.0153674	Ngrn	NEUGRIN PRECURSOR NEURITE OUTGROWTH ASSOCIATED
ENSMUSG00000032782	-1.07864	0.00397731	0.0508399	Cntrob	CENTROBIN CENTROSOMAL BRCA2 INTERACTING LYST INTERACTING 8
ENSMUSG00000041939	-1.07882	0.000515524	0.0107453	Mvk	MEVALONATE KINASE MK EC_2.7.1.36
ENSMUSG00000027244	-1.07891	0.00671221	0.0742306	Atg13	AUTOPHAGY RELATED 13
ENSMUSG00000033192	-1.07927	0.000280094	0.00656928	Lpcat2	LYSOPHOSPHATIDYLCHOLINE ACYLTRANSFERASE LPC ACYLTRANSFERASE LPCAT LYSOPC ACYLTRANSFERASE EC_2.3.1.- 1 ACYLGLYCEROPHOSPHOCHOLINE O ACYLTRANSFERASE EC_2.3.1.23 1 ALKYLGLYCEROPHOSPHOCHOLINE O ACETYLTRANSFERASE EC_2.3.-.- 1 67 ACETYL COA:LYSO PLATELET ACTIVAT
ENSMUSG00000041406	-1.07937	0.00318448	0.0428386	BC055324	UNCHARACTERIZED
ENSMUSG00000022517	-1.07938	0.000179927	0.0045983	Mgrn1	E3 UBIQUITIN LIGASE MGRN1 EC_6.3.2.- MAHOGUNIN RING FINGER 1
ENSMUSG00000035245	-1.07949	0.000902147	0.0165885	Eogt	EGF DOMAIN SPECIFIC O LINKED N ACETYLGLUCOSAMINE TRANSFERASE PRECURSOR EC_2.4.1.255 EXTRACELLULAR O LINKED N ACETYLGLUCOSAMINE TRANSFERASE
ENSMUSG00000040651	-1.08081	0.00413745	0.0524604	D14Abb1e	UNKNOWN
ENSMUSG00000055069	-1.08298	0.00823699	0.086566	Rab39	RAS RELATED RAB
ENSMUSG00000037337	-1.08382	0.000794754	0.0150031	Map4k1	MITOGEN ACTIVATED KINASE KINASE KINASE KINASE EC_2.7.11.1 KINASE MAPK/ERK KINASE KINASE KINASE MEK KINASE KINASE MEKKK
ENSMUSG00000038564	-1.08437	0.00107761	0.0189637	Ift172	INTRAFLAGELLAR TRANSPORT
ENSMUSG00000002326	-1.0844	0.000784313	0.0148273	Gmpr2	GMP REDUCTASE EC_1.7.1.7 GUANOSINE 5' MONOPHOSPHATE OXIDOREDUCTASE GUANOSINE MONOPHOSPHATE REDUCTASE
ENSMUSG00000039463	-1.08523	0.00105796	0.0187638	Slc9a8	SODIUM/HYDROGEN EXCHANGER 8 NA + /H + EXCHANGER 8 NHE 8 SOLUTE CARRIER FAMILY 9 MEMBER 8
ENSMUSG00000033396	-1.08545	0.00158907	0.0255	Spg11	SPATACSIN SPASTIC PARAPLEGIA 11
ENSMUSG00000080912	-1.08661	0.00360796	0.0472314	Gm12269
ENSMUSG00000038208	-1.088	0.00132768	0.0223273	Pgap3	POST GPI ATTACHMENT TO PROTEINS FACTOR 3 PRECURSOR PER1 DOMAIN CONTAINING 1
ENSMUSG00000035678	-1.08801	4.07591e-05	0.0014231	Tnfsf9	TUMOR NECROSIS FACTOR LIGAND SUPERFAMILY MEMBER 9 4 1BB LIGAND 4 1BBL
ENSMUSG00000037544	-1.08864	0.00212529	0.031972	Dlgap5	DISKS LARGE ASSOCIATED 5 DAP 5 DISCS LARGE HOMOLOG 7 DISKS LARGE ASSOCIATED DLG7 HEPATOMA UP REGULATED HURP
ENSMUSG00000030707	-1.09023	0.000227684	0.00552275	Coro1a	CORONIN
ENSMUSG00000066026	-1.0911	0.00109849	0.0192275	Dhrs3	SHORT CHAIN DEHYDROGENASE/REDUCTASE 3 EC_1.1.1.300 RETINAL SHORT CHAIN DEHYDROGENASE/REDUCTASE 1 RETSDR1
ENSMUSG00000019214	-1.09365	0.00666008	0.0738114	Chtf18	CHROMOSOME TRANSMISSION FIDELITY 18
ENSMUSG00000054405	-1.09375	0.000903072	0.0165939	Dnajc8	DNAJ HOMOLOG SUBFAMILY C MEMBER 8
ENSMUSG00000029447	-1.09465	0.000595495	0.0119286	Cct6a	T COMPLEX 1 SUBUNIT ZETA TCP 1 ZETA CCT ZETA
ENSMUSG00000002345	-1.09512	0.0004079	0.00889073	2310045N01Rik	MYOCYTE SPECIFIC ENHANCER FACTOR 2B
ENSMUSG00000063663	-1.09559	0.000926506	0.0169178	Brwd3	WD REPEAT CONTAINING
ENSMUSG00000090138	-1.09765	0.00603128	0.0687293	Gm3687
ENSMUSG00000033752	-1.09853	0.00296615	0.0405968	Mnd1	MEIOTIC NUCLEAR DIVISION 1 HOMOLOG
ENSMUSG00000026656	-1.09868	0.000168439	0.00438593	Fcgr2b	LOW AFFINITY IMMUNOGLOBULIN GAMMA FC REGION RECEPTOR III PRECURSOR IGG FC RECEPTOR III FC GAMMA RIII FCRIII CD16 ANTIGEN
ENSMUSG00000041949	-1.0994	0.00220432	0.0328406	Tango6	TRANSPORT AND GOLGI ORGANIZATION 6 HOMOLOG TRANSMEMBRANE AND COILED COIL DOMAIN CONTAINING 7
ENSMUSG00000045007	-1.10126	0.00556357	0.0648943	Tubg2	TUBULIN GAMMA CHAIN GAMMA TUBULIN
ENSMUSG00000046879	-1.10235	0.00267515	0.0378345	Irgm1	IMMUNITY RELATED GTPASE FAMILY M EC_3.6.5.- GTPASE INTERFERON INDUCIBLE 1 LPS STIMULATED RAW 264 7 MACROPHAGE 47 LRG 47
ENSMUSG00000034653	-1.10298	0.000662599	0.0129657	Ythdc2	PROBABLE ATP DEPENDENT RNA HELICASE YTHDC2 EC_3.6.4.13
ENSMUSG00000040010	-1.10436	0.00056312	0.011464	Slc7a5	AMINO ACID TRANSPORTER SOLUTE CARRIER FAMILY 7 MEMBER
ENSMUSG00000022685	-1.10495	0.000430391	0.00930362	Parn	POLY A SPECIFIC RIBONUCLEASE PARN EC_3.1.13.4 DEADENYLATING NUCLEASE DEADENYLATION NUCLEASE POLYADENYLATE SPECIFIC RIBONUCLEASE
ENSMUSG00000083139	-1.10928	0.00259893	0.0371169	Gm12418
ENSMUSG00000044906	-1.11044	0.000446246	0.00959099	4930503L19Rik	LUNG ADENOMA SUSCEPTIBILITY 2 PRECURSOR
ENSMUSG00000020319	-1.11104	0.00206305	0.0312328	Wdpcp	WD REPEAT CONTAINING AND PLANAR CELL POLARITY EFFECTOR FRITZ HOMOLOG WD REPEAT CONTAINING AND PLANAR CELL POLARITY EFFECTOR
ENSMUSG00000083367	-1.11233	0.000207274	0.00515159	Gm8806
ENSMUSG00000027939	-1.11312	0.00270798	0.0381599	Nup210l	NUCLEAR PORE MEMBRANE GLYCOPROTEIN 210 PRECURSOR NUCLEAR PORE GP210 NUCLEAR ENVELOPE PORE MEMBRANE POM 210 POM210 NUCLEOPORIN NUP210 PORE MEMBRANE OF 210 KDA
ENSMUSG00000035898	-1.11375	0.000541364	0.0111772	Uba6	UBIQUITIN MODIFIER ACTIVATING ENZYME UBIQUITIN ACTIVATING ENZYME E1
ENSMUSG00000050714	-1.11419	0.000884317	0.0163639	Zbtb26	ZINC FINGER AND BTB DOMAIN CONTAINING 6 ZINC FINGER 482
ENSMUSG00000021811	-1.11429	0.00242347	0.035264	Dnajc9	DNAJ HOMOLOG SUBFAMILY C MEMBER 9
ENSMUSG00000074482	-1.11476	0.00321187	0.0430733	Gm16589
ENSMUSG00000063785	-1.11512	0.000984125	0.0177474	Utp14a	U3 SMALL NUCLEOLAR RNA ASSOCIATED 14 HOMOLOG
ENSMUSG00000040482	-1.11546	0.000548129	0.0112991	Dom3z	DECAPPING AND EXORIBONUCLEASE DXO EC_3.1.13.- EC_3.6.-.- 1 DOM 3 HOMOLOG Z
ENSMUSG00000027306	-1.11674	0.00233136	0.0343624	Nusap1	NUCLEOLAR AND SPINDLE ASSOCIATED 1 NUSAP
ENSMUSG00000064128	-1.11718	0.00179372	0.0280127	Cenpj	CENTROMERE J CENP J
ENSMUSG00000048922	-1.11784	0.00526233	0.0623232	Cdca2	CELL DIVISION CYCLE ASSOCIATED 2
ENSMUSG00000046993	-1.1181	0.000208893	0.00518693	Gm5637
ENSMUSG00000048865	-1.11861	0.000171073	0.00443691	Arhgap30	RHO GTPASE ACTIVATING RHO TYPE GTPASE ACTIVATING GTPASE ACTIVATING
ENSMUSG00000050812	-1.11912	0.000476468	0.0100591	AI314180	PROTEASOME ECM29
ENSMUSG00000054715	-1.11968	0.000398997	0.00873298	Zscan22	ZINC FINGER AND SCAN DOMAIN CONTAINING ZINC FINGER
ENSMUSG00000027778	-1.12101	0.000765988	0.0146476	Ift80	INTRAFLAGELLAR TRANSPORT 80 HOMOLOG WD REPEAT CONTAINING 56
ENSMUSG00000089844	-1.12109	0.000295016	0.00680353	A530032D15Rik	AMBIGUOUS
ENSMUSG00000017176	-1.1217	0.000518661	0.0108021	Nt5c3b	7 METHYLGUANOSINE PHOSPHATE SPECIFIC 5' NUCLEOTIDASE EC_3.1.3.- CYTOSOLIC 5' NUCLEOTIDASE 3B CYTOSOLIC 5' NUCLEOTIDASE III CN III EC_3.1.3.5
ENSMUSG00000040701	-1.1218	0.000283456	0.00662433	Ap1g2	AP 1 COMPLEX SUBUNIT GAMMA 1 CLATHRIN ASSEMBLY COMPLEX 1 GAMMA 1 LARGE CHAIN GAMMA 1
ENSMUSG00000056260	-1.1224	0.000292433	0.00677974	Lrif1	LIGAND DEPENDENT NUCLEAR RECEPTOR INTERACTING FACTOR 1
ENSMUSG00000033589	-1.12274	0.00113149	0.0197135	Reep4	RECEPTOR EXPRESSION ENHANCING
ENSMUSG00000049411	-1.12302	0.00205989	0.031203	Tmem241	TRANSMEMBRANE 241
ENSMUSG00000072694	-1.12324	0.00200098	0.030647	1500011B03Rik	UNKNOWN
ENSMUSG00000022570	-1.12442	0.000293823	0.00678795	Tsta3	GDP L FUCOSE SYNTHASE EC_1.1.1.271 GDP 4 KETO 6 DEOXY D MANNOSE 3 5 EPIMERASE 4 REDUCTASE FX RED CELL NADP H BINDING
ENSMUSG00000022360	-1.12473	0.000671541	0.0130724	Atad2	ATPASE FAMILY AAA DOMAIN CONTAINING
ENSMUSG00000017210	-1.12605	0.000274457	0.00647753	Med24	MEDIATOR OF RNA POLYMERASE II TRANSCRIPTION SUBUNIT 24 MEDIATOR COMPLEX SUBUNIT 24 THYROID HORMONE RECEPTOR ASSOCIATED 4
ENSMUSG00000021809	-1.12669	0.00237385	0.0348319	Nudt13	NUCLEOSIDE DIPHOSPHATE LINKED MOIETY X MOTIF 13 NUDIX MOTIF 13 EC 3
ENSMUSG00000026708	-1.12979	0.00138819	0.0230525	Cenpl	CENTROMERE L CENP L
ENSMUSG00000034055	-1.13179	0.00165494	0.0264254	Phka1	PHOSPHORYLASE B KINASE REGULATORY SUBUNIT ALPHA PHOSPHORYLASE KINASE SUBUNIT
ENSMUSG00000025968	-1.13181	0.000424569	0.00920812	Ndufs1	NADH UBIQUINONE OXIDOREDUCTASE 75 KDA SUBUNIT MITOCHONDRIAL PRECURSOR EC_1.6.5.3 EC_1.6.99.- 3 COMPLEX I 75KD CI 75KD
ENSMUSG00000008373	-1.13258	0.000397311	0.00871062	Prpf31	U4/U6 SMALL NUCLEAR RIBONUCLEOPROTEIN PRP31 PRE PROCESSING FACTOR 31
ENSMUSG00000056536	-1.13442	0.000364278	0.00810156	Pign	GPI ETHANOLAMINE PHOSPHATE TRANSFERASE 1 EC 2
ENSMUSG00000046207	-1.13492	0.000191304	0.00484654	Pik3r6	PHOSPHOINOSITIDE 3 KINASE REGULATORY SUBUNIT 6 PHOSPHOINOSITIDE 3 KINASE GAMMA ADAPTER OF 87 KDA P84 PI3K ADAPTER P84 PIKAP P87 PI3K ADAPTER P87PIKAP
ENSMUSG00000060288	-1.13513	0.00222691	0.0331395	Ppih	PEPTIDYL PROLYL CIS TRANS ISOMERASE H PPIASE H EC_5.2.1.8 ROTAMASE H
ENSMUSG00000037149	-1.13518	0.000537076	0.0110975	Ddx1	ATP DEPENDENT RNA HELICASE DDX1 EC_3.6.4.13 DEAD BOX 1
ENSMUSG00000035505	-1.13597	0.000276446	0.0065069	Cox18	MITOCHONDRIAL INNER MEMBRANE COX18 PRECURSOR
ENSMUSG00000032198	-1.13686	0.000465497	0.00989125	Dock6	DEDICATOR OF CYTOKINESIS
ENSMUSG00000019814	-1.13817	0.000347155	0.00778013	Ltv1	LTV1 HOMOLOG
ENSMUSG00000022177	-1.13818	0.002442	0.0355139	Haus4	HAUS AUGMIN COMPLEX SUBUNIT 4
ENSMUSG00000041431	-1.13856	0.00105838	0.0187638	Ccnb1	G2/MITOTIC SPECIFIC CYCLIN B
ENSMUSG00000041238	-1.13982	0.000568912	0.0115371	Rbbp8	DNA ENDONUCLEASE RBBP8 EC_3.1.-.- CTBP INTERACTING CTIP RETINOBLASTOMA BINDING 8 RBBP 8 RETINOBLASTOMA INTERACTING AND MYOSIN RIM SPORULATION IN THE ABSENCE OF SPO11 2 HOMOLOG SAE2
ENSMUSG00000000902	-1.13998	0.000137212	0.00371359	Smarcb1	SWI/SNF RELATED MATRIX ASSOCIATED ACTIN DEPENDENT REGULATOR OF CHROMATIN SUBFAMILY B MEMBER 1
ENSMUSG00000035704	-1.14083	0.000772005	0.0147434	Alg8	DOLICHYL PYROPHOSPHATE GLC1MAN9GLCNAC2 ALPHA 1 3 GLUCOSYLTRANSFERASE EC_2.4.1.265 ASPARAGINE LINKED GLYCOSYLATION 8 DOL P GLC:GLC 1 MAN 9 GLCNAC 2 PP DOLICHYL ALPHA 1 3 GLUCOSYLTRANSFERASE DOLICHYL P GLC:GLC1MAN9GLCNAC2 PP DOLICHYL GLUCOSYLTRANSFERASE
ENSMUSG00000023015	-1.14222	0.00119736	0.0206426	Racgap1	RAC GTPASE ACTIVATING 1 MALE GERM CELL RACGAP MGCRACGAP
ENSMUSG00000026648	-1.14317	0.000483549	0.0101841	Dclre1c	ARTEMIS EC_3.1.-.- DNA CROSS LINK REPAIR 1C
ENSMUSG00000097657	-1.14623	0.000467077	0.00990877	RP24-215A14.2
ENSMUSG00000040195	-1.14917	0.00107056	0.0189313	Tmem194	TRANSMEMBRANE
ENSMUSG00000081373	-1.1494	0.00591745	0.0677438	Gm16436
ENSMUSG00000056899	-1.15095	0.00320221	0.0430324	Immp2l	MITOCHONDRIAL INNER MEMBRANE PROTEASE SUBUNIT 2 EC_3.4.21.- IMP2
ENSMUSG00000081242	-1.15276	0.00474076	0.0579251	Gm15719
ENSMUSG00000053560	-1.15309	0.00664905	0.0738077	Ier2	IMMEDIATE EARLY RESPONSE GENE 2
ENSMUSG00000035086	-1.15505	0.000248871	0.0059704	Becn1	BECLIN 1
ENSMUSG00000078942	-1.15617	0.000967454	0.0174949	Naip6	BACULOVIRAL IAP REPEAT CONTAINING NEURONAL APOPTOSIS INHIBITORY
ENSMUSG00000039470	-1.1565	0.00288404	0.0398057	Zdhhc2	PALMITOYLTRANSFERASE EC_2.3.1.- ZINC FINGER DHHC DOMAIN CONTAINING DHHC
ENSMUSG00000031969	-1.15707	0.00044031	0.00947895	Acad8	ISOBUTYRYL COA DEHYDROGENASE MITOCHONDRIAL PRECURSOR EC_1.3.99.- ACYL COA DEHYDROGENASE FAMILY MEMBER 8 ACAD 8
ENSMUSG00000014245	-1.15859	0.000555671	0.0113652	Pigl	N ACETYLGLUCOSAMINYL PHOSPHATIDYLINOSITOL DE N ACETYLASE EC_3.5.1.89 PHOSPHATIDYLINOSITOL GLYCAN BIOSYNTHESIS CLASS L PIG L
ENSMUSG00000097908	-1.15897	0.000919382	0.0167994	AC147987.1
ENSMUSG00000001829	-1.15917	0.000287356	0.00668568	Clpb	CASEINOLYTIC PEPTIDASE B HOMOLOG SUPPRESSOR OF POTASSIUM TRANSPORT DEFECT 3
ENSMUSG00000020309	-1.16089	0.000373996	0.00828955	Chac2	CATION TRANSPORT REGULATOR 2
ENSMUSG00000038685	-1.16148	0.00042689	0.0092508	Rtel1	REGULATOR OF TELOMERE ELONGATION HELICASE 1 EC_3.6.4.12
ENSMUSG00000023883	-1.16161	0.000291834	0.0067747	Phf10	PHD FINGER 10 BRG1 ASSOCIATED FACTOR 45A BAF45A
ENSMUSG00000019080	-1.162	0.000983595	0.0177474	Mfsd3	MAJOR FACILITATOR SUPERFAMILY DOMAIN CONTAINING 3
ENSMUSG00000019432	-1.16302	0.000194872	0.0049085	Ddx39b	ATP DEPENDENT RNA HELICASE SUB2 EC_3.6.4.13
ENSMUSG00000021686	-1.1631	0.000220382	0.00539555	Ap3b1	AP 3 COMPLEX SUBUNIT BETA 1 ADAPTER RELATED COMPLEX 3 SUBUNIT BETA 1 ADAPTOR COMPLEX AP 3 SUBUNIT BETA 1 BETA 3A ADAPTIN CLATHRIN ASSEMBLY COMPLEX 3 BETA 1 LARGE CHAIN
ENSMUSG00000001248	-1.16366	4.94044e-05	0.00165234	Gramd1a	GRAM DOMAIN CONTAINING
ENSMUSG00000031402	-1.16375	4.39592e-05	0.00150674	Mpp1	55 KDA ERYTHROCYTE MEMBRANE P55 MEMBRANE PROTEIN PALMITOYLATED 1
ENSMUSG00000063235	-1.16509	0.00658299	0.073234	Ptpmt1
ENSMUSG00000026134	-1.16558	0.00146156	0.0239353	Prim2	DNA PRIMASE LARGE SUBUNIT EC_2.7.7.- DNA PRIMASE 58 KDA SUBUNIT
ENSMUSG00000028525	-1.16572	0.000277448	0.00652463	Pde4b	CAMP SPECIFIC 3' 5' CYCLIC PHOSPHODIESTERASE EC_3.1.4.17
ENSMUSG00000024613	-1.1662	0.000218119	0.00535014	Tcof1	TREACLE TREACHER COLLINS SYNDROME
ENSMUSG00000039230	-1.16787	0.000233529	0.00564465	Tbcd	TUBULIN SPECIFIC CHAPERONE D BETA TUBULIN COFACTOR D TUBULIN FOLDING COFACTOR D
ENSMUSG00000031629	-1.16851	0.00605488	0.0689085	Mlf1ip	CENTROMERE U CENP U MLF1 INTERACTING
ENSMUSG00000053063	-1.16886	0.00167048	0.0265143	Clec12a	C TYPE LECTIN DOMAIN FAMILY 12 MEMBER A C TYPE LECTIN MOLECULE 1 CLL 1 MYELOID INHIBITORY C TYPE LECTIN RECEPTOR MICL
ENSMUSG00000022160	-1.16892	0.000332206	0.00752226	Mettl3	N6 ADENOSINE METHYLTRANSFERASE 70 KDA SUBUNIT MT A70 EC_2.1.1.62 METHYLTRANSFERASE 3
ENSMUSG00000036181	-1.16936	0.000887334	0.0163966	Hist1h1c	HISTONE H1 2 H1 VAR 1 H1C
ENSMUSG00000064317	-1.17015	0.000105965	0.00303993	Gm10146	U6 SNRNA ASSOCIATED SM LSM7
ENSMUSG00000056938	-1.17053	0.00013087	0.00358501	Acbd4	ACYL COA BINDING DOMAIN CONTAINING 4
ENSMUSG00000010048	-1.17066	0.000522801	0.0108538	Ifrd2	INTERFERON RELATED DEVELOPMENTAL REGULATOR 1 NERVE GROWTH FACTOR INDUCIBLE PC4
ENSMUSG00000024989	-1.17125	0.00329408	0.0439563	Cep55	CENTROSOMAL OF 55 KDA CEP55
ENSMUSG00000035683	-1.17234	0.00314681	0.0424641	Melk	MATERNAL EMBRYONIC LEUCINE ZIPPER KINASE EC_2.7.11.1 KINASE PK38 TYROSINE KINASE MELK EC_2.7.10.- 2
ENSMUSG00000025076	-1.17332	0.000315959	0.00724192	Casp7	CASPASE 3 PRECURSOR CASP 3 EC_3.4.22.56 [CONTAINS CASPASE 3 SUBUNIT P17; CASPASE 3 SUBUNIT P12]
ENSMUSG00000001774	-1.17412	6.79139e-05	0.00212756	Chordc1	CYSTEINE AND HISTIDINE RICH DOMAIN CONTAINING 1 CHORD DOMAIN CONTAINING 1 CHP 1 MORGANA
ENSMUSG00000050188	-1.17549	0.00515082	0.0614187	Lsm10	U7 SNRNA ASSOCIATED SM LSM10
ENSMUSG00000078667	-1.17644	0.00671898	0.0742742	1700094D03Rik	UNCHARACTERIZED HOMOLOG
ENSMUSG00000052125	-1.17644	0.00268147	0.037883	F730043M19Rik
ENSMUSG00000001998	-1.17678	0.000562771	0.011464	Ap4e1	AP 4 COMPLEX SUBUNIT EPSILON 1 AP 4 ADAPTER COMPLEX SUBUNIT EPSILON ADAPTER RELATED COMPLEX 4 SUBUNIT EPSILON 1 EPSILON SUBUNIT OF AP 4 EPSILON ADAPTIN
ENSMUSG00000085058	-1.17697	9.28435e-05	0.00273471	8030453O22Rik
ENSMUSG00000003762	-1.1789	0.000318451	0.00729172	Adck4	CHAPERONE ACTIVITY OF BC1 COMPLEX MITOCHONDRIAL PRECURSOR CHAPERONE ABC1 EC_2.7.11.- AARF DOMAIN CONTAINING KINASE 3
ENSMUSG00000031657	-1.17942	0.000385425	0.0084855	Heatr3	HEAT REPEAT CONTAINING 3
ENSMUSG00000086420	-1.17975	0.00154856	0.0250184	Gm8865
ENSMUSG00000072889	-1.18117	0.000101962	0.00294114	Nfxl1	NF X1 TYPE ZINC FINGER NFXL1
ENSMUSG00000074476	-1.18148	0.00692084	0.0759612	Spc24	KINETOCHORE SPC24
ENSMUSG00000018372	-1.18325	0.000909043	0.0166336	Cep95	CENTROSOMAL OF 95 KDA COILED COIL DOMAIN CONTAINING 45
ENSMUSG00000030505	-1.18356	0.000263017	0.00624688	Prmt3	ARGININE N METHYLTRANSFERASE 3 EC_2.1.1.- HETEROGENEOUS NUCLEAR RIBONUCLEOPROTEIN METHYLTRANSFERASE 3
ENSMUSG00000016637	-1.18463	0.000377458	0.00834178	Ift27	INTRAFLAGELLAR TRANSPORT 27 HOMOLOG GTP BINDING RAY RAB 4
ENSMUSG00000090128	-1.18532	0.00548031	0.0641854	Gm16038
ENSMUSG00000034321	-1.18617	0.000172199	0.00445502	Exosc1	EXOSOME COMPLEX COMPONENT CSL4 EXOSOME COMPONENT 1
ENSMUSG00000038943	-1.18769	0.00679835	0.0749109	Prc1	REGULATOR OF CYTOKINESIS 1
ENSMUSG00000038299	-1.18795	0.00037092	0.00824229	Wdr36	WD REPEAT CONTAINING
ENSMUSG00000036860	-1.18827	0.000342179	0.00770152	Mrpl55	39S RIBOSOMAL L55 MITOCHONDRIAL PRECURSOR L55MT MRP L55
ENSMUSG00000027752	-1.18894	0.00668422	0.0740147	Exosc8	EXOSOME COMPLEX COMPONENT RRP43 EXOSOME COMPONENT 8 RIBOSOMAL RNA PROCESSING 43
ENSMUSG00000082264	-1.18963	0.000191604	0.00484947	Gm12799
ENSMUSG00000032580	-1.19045	7.21326e-05	0.00221994	Rbm5	RNA BINDING RNA BINDING MOTIF
ENSMUSG00000003863	-1.19063	0.000140253	0.00377187	Ppfia3	LIPRIN ALPHA TYROSINE PHOSPHATASE RECEPTOR TYPE F POLYPEPTIDE INTERACTING ALPHA PTPRF INTERACTING ALPHA
ENSMUSG00000028708	-1.19273	7.63571e-05	0.00231533	Mknk1	MAP KINASE INTERACTING SERINE/THREONINE KINASE 1 EC_2.7.11.1 MAP KINASE SIGNAL INTEGRATING KINASE 1 MAPK SIGNAL INTEGRATING KINASE 1 MNK1
ENSMUSG00000091811	-1.19395	0.00124621	0.0212601	Prr24	UNKNOWN
ENSMUSG00000082279	-1.19455	0.00167583	0.0265671	Gm12870
ENSMUSG00000015340	-1.19521	0.000117806	0.00328617	Cybb	EC 1 SUBUNIT 1
ENSMUSG00000050533	-1.19581	0.00596648	0.068139	Gm9845	CASP8 AND FADD APOPTOSIS REGULATOR PRECURSOR CASPASE HOMOLOG CASH CASPASE EIGHT RELATED CASPER CASPASE APOPTOSIS REGULATORY CLARP CELLULAR FLICE INHIBITORY C FLIP FADD ANTIAPOPTOTIC MOLECULE 1 FLAME 1 INHIBITOR OF FLICE I FLICE MACH RELATED INDUCER OF
ENSMUSG00000022978	-1.19693	0.000247255	0.00593706	Mis18a	MIS18 ALPHA
ENSMUSG00000071715	-1.19698	6.91142e-05	0.00214213	Ncf4	NEUTROPHIL CYTOSOL FACTOR 4 NCF 4 NEUTROPHIL NADPH OXIDASE FACTOR 4 P40 PHOX P40PHOX
ENSMUSG00000066621	-1.19724	0.000453148	0.00970751	Tecpr1	TECTONIN BETA PROPELLER REPEAT CONTAINING 1
ENSMUSG00000037110	-1.19778	0.000131117	0.00358501	Ralgapa2	RAL GTPASE ACTIVATING SUBUNIT ALPHA 1 GAP RELATED INTERACTING PARTNER TO E12 GRIPE GTPASE ACTIVATING DOMAIN 1 TUBERIN 1 P240
ENSMUSG00000055923	-1.19812	0.00155548	0.0251147	Aasdh	ACYL COA SYNTHETASE FAMILY MEMBER 4 EC_6.2.1.-
ENSMUSG00000080772	-1.19981	0.000342531	0.00770284	Gm12543
ENSMUSG00000021902	-1.2005	0.000520893	0.0108314	Phf7	G2/M PHASE SPECIFIC E3 UBIQUITIN LIGASE EC_6.3.2.-
ENSMUSG00000051278	-1.20144	0.00135565	0.022728	4930422G04Rik	UNCHARACTERIZED
ENSMUSG00000021932	-1.2023	0.00540883	0.0636557	Rnaseh2b	RIBONUCLEASE H2 SUBUNIT B RNASE H2 SUBUNIT B RIBONUCLEASE HI SUBUNIT B
ENSMUSG00000030780	-1.20299	5.08578e-05	0.00169017	BC017158	UNKNOWN
ENSMUSG00000030685	-1.20301	0.00051109	0.0106613	Kctd13	BTB/POZ DOMAIN CONTAINING ADAPTER CUL3 MEDIATED RHOA DEGRADATION BTB/POZ DOMAIN CONTAINING
ENSMUSG00000022359	-1.20334	0.000337578	0.00761103	Wdyhv1	N TERMINAL GLUTAMINE AMIDOHYDROLASE EC_3.5.1.- NH2 TERMINAL GLUTAMINE DEAMIDASE N TERMINAL GLN AMIDASE NT Q AMIDASE
ENSMUSG00000022906	-1.20372	0.000291957	0.0067747	Parp9	POLY [ADP RIBOSE] POLYMERASE 9 PARP 9 EC_2.4.2.30 ADP RIBOSYLTRANSFERASE DIPHTHERIA TOXIN 9 ARTD9 B AGGRESSIVE LYMPHOMA
ENSMUSG00000024235	-1.20679	0.000204164	0.00508877	Map3k8	MITOGEN ACTIVATED KINASE KINASE KINASE 8 EC_2.7.11.25 CANCER OSAKA THYROID ONCOGENE PROTO ONCOGENE C COT SERINE/THREONINE KINASE COT
ENSMUSG00000005667	-1.20751	0.000239695	0.00577669	Mthfd2	PROBABLE BIFUNCTIONAL METHYLENETETRAHYDROFOLATE DEHYDROGENASE/CYCLOHYDROLASE 2 NADP DEPENDENT METHYLENETETRAHYDROFOLATE DEHYDROGENASE 2 MTHFD2 [INCLUDES NAD DEPENDENT METHYLENETETRAHYDROFOLATE DEHYDROGENASE EC_1.5.1.15 ; METHENYLTETRAHYDROFOLATE CYCLOHY
ENSMUSG00000083000	-1.20889	0.00246722	0.035841	Gm15678
ENSMUSG00000029551	-1.20927	0.000188851	0.00479367	Psmg3	PROTEASOME ASSEMBLY CHAPERONE 3
ENSMUSG00000040528	-1.20977	5.15056e-05	0.00170567	Milr1	ALLERGIN 1 PRECURSOR ALLERGY INHIBITORY RECEPTOR 1 MAST CELL ANTIGEN 32 MCA 32 MAST CELL AG 32 MAST CELL IMMUNOGLOBULIN RECEPTOR 1
ENSMUSG00000028689	-1.21023	0.00105681	0.0187614	Ccdc163	UNCHARACTERIZED
ENSMUSG00000090523	-1.21229	0.00118926	0.0205425	Gypc	GLYCOPHORIN C CD236 ANTIGEN
ENSMUSG00000030528	-1.21339	0.000594987	0.0119275	Blm	ATP DEPENDENT DNA HELICASE Q1 EC_3.6.4.12
ENSMUSG00000063884	-1.21381	0.000293218	0.00678403	Ptcd3	PENTATRICOPEPTIDE REPEAT DOMAIN CONTAINING 3 MITOCHONDRIAL PRECURSOR
ENSMUSG00000027639	-1.21594	0.004335	0.0541792	Samhd1	DEOXYNUCLEOSIDE TRIPHOSPHATE TRIPHOSPHOHYDROLASE SAMHD1 DNTPASE EC_3.1.5.-
ENSMUSG00000026773	-1.21607	0.0057384	0.0662848	Pfkfb3	6 PHOSPHOFRUCTO 2 KINASE/FRUCTOSE 2 6 BISPHOSPHATASE 6PF 2 K/FRU 2 6 P2ASE PFK/FBPASE 6PF 2 K/FRU 2 6 P2ASE ISOZYME [INCLUDES 6 PHOSPHOFRUCTO 2 KINASE EC_2.7.1.105 ; FRUCTOSE 2 6 BISPHOSPHATASE EC_3.1.3.- 46 ]
ENSMUSG00000034108	-1.21904	0.000630695	0.0124811	Ccs	COPPER CHAPERONE SUPEROXIDE DISMUTASE SUPEROXIDE DISMUTASE COPPER CHAPERONE
ENSMUSG00000066538	-1.21925	0.00260765	0.0371979	Gm6254
ENSMUSG00000069045	-1.21968	0.000139657	0.00376355	Ddx3y	ATP DEPENDENT RNA HELICASE EC_3.6.4.13
ENSMUSG00000059669	-1.22034	0.000219497	0.0053789	Taf1b	TATA BOX BINDING ASSOCIATED FACTOR RNA POLYMERASE I SUBUNIT B RNA POLYMERASE I SPECIFIC TBP ASSOCIATED FACTOR KDA TATA BOX BINDING ASSOCIATED FACTOR 1B TBP ASSOCIATED FACTOR 1B TRANSCRIPTION INITIATION FACTOR SL1/TIF IB SUBUNIT B
ENSMUSG00000066637	-1.22231	0.000620618	0.0123282	Ttc32	TETRATRICOPEPTIDE REPEAT 32 TPR REPEAT 32
ENSMUSG00000025888	-1.22239	0.00900308	0.0923591	Casp1	CASPASE PRECURSOR CASP INTERLEUKIN 1 BETA CONVERTING ENZYME [CONTAINS CASPASE SUBUNIT CASPASE SUBUNIT
ENSMUSG00000024079	-1.22391	0.000381845	0.00841375	Eif2ak2	INTERFERON INDUCED DOUBLE STRANDED RNA ACTIVATED KINASE EC_2.7.11.1 EUKARYOTIC TRANSLATION INITIATION FACTOR 2 ALPHA KINASE 2 EIF 2A KINASE 2 INTERFERON INDUCIBLE RNA DEPENDENT KINASE P1/EIF 2A KINASE KINASE RNA ACTIVATED PKR TYROSINE KINASE EIF2AK2 EC_2.
ENSMUSG00000054404	-1.22452	0.000193673	0.00488769	Slfn5	SCHLAFEN FAMILY MEMBER
ENSMUSG00000048534	-1.22499	0.00422859	0.0531534	Amica1	JUNCTIONAL ADHESION MOLECULE PRECURSOR DENDRITIC CELL SPECIFIC CREA7
ENSMUSG00000024833	-1.2271	9.7136e-05	0.00283315	Pola2	DNA POLYMERASE ALPHA SUBUNIT B DNA POLYMERASE ALPHA 70 KDA SUBUNIT
ENSMUSG00000020792	-1.22832	4.5181e-05	0.00154056	Exoc7	EXOCYST COMPLEX COMPONENT 7 EXOCYST COMPLEX COMPONENT EXO70
ENSMUSG00000006021	-1.22944	0.000680117	0.0132001	Kptn	KAPTIN
ENSMUSG00000024054	-1.23297	0.000357722	0.00797605	Smchd1	STRUCTURAL MAINTENANCE OF CHROMOSOMES FLEXIBLE HINGE DOMAIN CONTAINING 1
ENSMUSG00000046027	-1.23415	0.000196833	0.00494363	Stard5	STAR RELATED LIPID TRANSFER 5 START DOMAIN CONTAINING 5 STARD5
ENSMUSG00000041966	-1.23443	0.000586222	0.0118059	Dcaf17	DDB1 AND CUL4 ASSOCIATED FACTOR 17
ENSMUSG00000081605	-1.23456	0.00640013	0.0719322	Gm15953
ENSMUSG00000030924	-1.2359	0.00216386	0.0323482	2610020H08Rik	RNA EXONUCLEASE NEF SP EC_3.1.-.-
ENSMUSG00000030279	-1.23628	0.00012027	0.00334069	C2cd5	C2 DOMAIN CONTAINING 5.138 KDA C2 DOMAIN CONTAINING PHOSPHOPROTEIN
ENSMUSG00000055416	-1.23664	0.00566995	0.065813	Fam136b-ps	UNKNOWN
ENSMUSG00000044827	-1.23684	0.000116591	0.00326967	Tlr1	TOLL RECEPTOR PRECURSOR ANTIGEN
ENSMUSG00000080773	-1.23684	0.00279958	0.0389845	Gm12955
ENSMUSG00000052917	-1.23751	0.00107712	0.0189637	Senp7	SENTRIN SPECIFIC PROTEASE 7 SUMO 1 SPECIFIC PROTEASE 2 SENTRIN/SUMO SPECIFIC PROTEASE SENP7
ENSMUSG00000030591	-1.24007	6.1581e-05	0.00195337	Psmd8	26S PROTEASOME NON ATPASE REGULATORY SUBUNIT 8 26S PROTEASOME REGULATORY SUBUNIT RPN12 26S PROTEASOME REGULATORY SUBUNIT S14
ENSMUSG00000024983	-1.24012	6.88407e-05	0.00214125	Vti1a	VESICLE TRANSPORT THROUGH INTERACTION WITH T SNARES HOMOLOG 1A VESICLE TRANSPORT V SNARE VTI1 2 VTI1 RP2
ENSMUSG00000017057	-1.24017	4.81733e-05	0.0016215	Il13ra1	INTERLEUKIN 13 RECEPTOR SUBUNIT ALPHA 1 PRECURSOR IL 13 RECEPTOR SUBUNIT ALPHA 1 IL 13R SUBUNIT ALPHA 1 IL 13R ALPHA 1 IL 13RA1 C ANTIGEN
ENSMUSG00000060538	-1.24043	1.44574e-05	0.000595113	Tmem219	INSULIN GROWTH FACTOR BINDING 3 RECEPTOR PRECURSOR IGFBP 3R TRANSMEMBRANE 219
ENSMUSG00000027959	-1.24046	0.000826273	0.0154645	Sass6	SPINDLE ASSEMBLY ABNORMAL 6 HOMOLOG
ENSMUSG00000054855	-1.24209	0.000649951	0.0127563	Rnd1	RHO RELATED GTP BINDING PRECURSOR RHO FAMILY GTPASE
ENSMUSG00000028874	-1.2427	5.03643e-05	0.00167719	Fgr	TYROSINE KINASE EC_2.7.10.2
ENSMUSG00000025036	-1.24288	0.000137236	0.00371359	Sfxn2	SIDEROFLEXIN
ENSMUSG00000081880	-1.24392	0.00263509	0.03747	Gm5385
ENSMUSG00000066233	-1.24443	0.00120761	0.0207593	Tmem42	TRANSMEMBRANE 42
ENSMUSG00000024014	-1.24609	0.000136314	0.00369713	Pim1	SERINE/THREONINE KINASE PIM EC_2.7.11.1
ENSMUSG00000091931	-1.24617	0.00274335	0.0384876	AK010878	UNKNOWN
ENSMUSG00000026456	-1.24785	5.5752e-05	0.00180701	Cyb5r1	NADH CYTOCHROME B5 REDUCTASE B5R EC_1.6.2.2
ENSMUSG00000030589	-1.25284	0.00600511	0.0684907	Rasgrp4	RAS GUANYL RELEASING CALCIUM AND DAG REGULATED GUANINE NUCLEOTIDE EXCHANGE FACTOR CALDAG
ENSMUSG00000050174	-1.25438	0.000898783	0.0165615	Nudt6	NUCLEOSIDE DIPHOSPHATE LINKED MOIETY X MOTIF 6 NUDIX MOTIF 6 EC_3.6.1.- ANTISENSE BASIC FIBROBLAST GROWTH FACTOR
ENSMUSG00000010911	-1.25454	0.000239414	0.00577523	Apip	METHYLTHIORIBULOSE 1 PHOSPHATE DEHYDRATASE MTRU 1 P DEHYDRATASE EC_4.2.1.109
ENSMUSG00000068101	-1.25457	0.00321997	0.0430989	Cenpm	CENTROMERE M CENP M PROLIFERATION ASSOCIATED NUCLEAR ELEMENT 1
ENSMUSG00000050107	-1.25538	0.000255936	0.00610082	Gsg2	SERINE/THREONINE KINASE HASPIN EC_2.7.11.1 GERM CELL SPECIFIC GENE 2 HAPLOID GERM CELL SPECIFIC NUCLEAR KINASE
ENSMUSG00000027654	-1.25788	0.00185277	0.0288146	Fam83d	FAM83D
ENSMUSG00000032112	-1.25803	1.68582e-05	0.000676937	Trappc4	TRAFFICKING PARTICLE COMPLEX SUBUNIT 4
ENSMUSG00000034729	-1.25856	0.000206029	0.00512551	Mrps10	28S RIBOSOMAL S10 MITOCHONDRIAL MRP S10 S10MT
ENSMUSG00000025545	-1.26134	0.00374694	0.0486378	Clybl	CITRATE LYASE SUBUNIT BETA PROTEIN MITOCHONDRIAL PRECURSOR CITRATE LYASE BETA EC_4.1.-.-
ENSMUSG00000036561	-1.26143	0.000193557	0.00488769	Ppp6r2	SERINE/THREONINE PHOSPHATASE 6 REGULATORY SUBUNIT SAPS DOMAIN FAMILY MEMBER
ENSMUSG00000035049	-1.2634	0.000108706	0.00309487	Rrp12	RRP12
ENSMUSG00000029676	-1.26412	0.000355076	0.0079373	Pot1a	PROTECTION OF TELOMERES 1 POT1 TELOMERE END BINDING
ENSMUSG00000081402	-1.26554	0.000593919	0.0119152	Gm15455
ENSMUSG00000028104	-1.26554	0.000110473	0.00313158	Polr3gl	DNA DIRECTED RNA POLYMERASE III SUBUNIT RPC7 RNA POLYMERASE III SUBUNIT C7 DNA DIRECTED RNA POLYMERASE III SUBUNIT G
ENSMUSG00000015478	-1.26566	3.88339e-05	0.00136132	Rnf5	E3 UBIQUITIN LIGASE EC_6.3.2.- RING FINGER
ENSMUSG00000093862	-1.26853	0.0016175	0.0258771	Gm5117	TRIMETHYLGUANOSINE SYNTHASE EC_2.1.1.- NUCLEAR RECEPTOR COACTIVATOR 6 INTERACTING PRIP INTERACTING WITH METHYLTRANSFERASE MOTIF PIMT PIPMT
ENSMUSG00000043800	-1.27077	0.00955627	0.0965607	Kifc5c-ps
ENSMUSG00000033282	-1.27259	0.000311642	0.00715549	Rpgrip1l	X LINKED RETINITIS PIGMENTOSA GTPASE REGULATOR INTERACTING 1 RPGR INTERACTING 1
ENSMUSG00000032560	-1.27292	3.21805e-05	0.00116227	Dnajc13	DNAJ HOMOLOG SUBFAMILY C MEMBER 13 REQUIRED RECEPTOR MEDIATED ENDOCYTOSIS 8 RME 8
ENSMUSG00000020526	-1.27921	0.00684427	0.07531	Znhit3	ZINC FINGER HIT DOMAIN CONTAINING 3 THYROID HORMONE RECEPTOR INTERACTOR 3 THYROID RECEPTOR INTERACTING 3 TR INTERACTING 3 TRIP 3
ENSMUSG00000030423	-1.27989	9.90263e-05	0.00287868	Pop4	RIBONUCLEASE P SUBUNIT P29 EC_3.1.26.5
ENSMUSG00000046805	-1.28161	3.73314e-06	0.000198957	Mpeg1	MACROPHAGE EXPRESSED GENE 1 PRECURSOR MACROPHAGE GENE 1 MPG 1
ENSMUSG00000033792	-1.28163	0.000117748	0.00328617	Atp7a	COPPER TRANSPORTING ATPASE 2 EC_3.6.3.4 COPPER PUMP 2 WILSON DISEASE ASSOCIATED
ENSMUSG00000036023	-1.28231	9.03824e-05	0.00266582	Parp2	POLY [ADP RIBOSE] POLYMERASE 1 PARP 1 EC_2.4.2.30 ADP RIBOSYLTRANSFERASE DIPHTHERIA TOXIN 1 ARTD1 NAD + ADP RIBOSYLTRANSFERASE 1 ADPRT 1 POLY[ADP RIBOSE] SYNTHASE 1
ENSMUSG00000028344	-1.28531	4.32141e-05	0.00148971	Invs	INVERSIN INVERSION OF EMBRYO TURNING NEPHROCYSTIN 2
ENSMUSG00000003531	-1.28542	0.00022446	0.00545464	Dgcr6	DIGEORGE SYNDROME CRITICAL REGION 6
ENSMUSG00000025350	-1.28581	0.00349268	0.046044	Rdh5	PRECURSOR EC_1.1.-.- 3 ALPHA HYDROXYSTEROID 3 ALPHA
ENSMUSG00000025758	-1.28595	0.000182636	0.00465847	Plk4	SERINE/THREONINE KINASE PLK4 EC_2.7.11.21 POLO KINASE 4 PLK 4 SERINE/THREONINE KINASE SAK
ENSMUSG00000083180	-1.28636	0.0036439	0.0476067	Gm15007
ENSMUSG00000025731	-1.2864	0.00018863	0.00479271	0610011F06Rik	HOMOLOG
ENSMUSG00000025395	-1.28762	0.000654033	0.0128076	Prim1	DNA PRIMASE SMALL SUBUNIT EC_2.7.7.- DNA PRIMASE KDA SUBUNIT
ENSMUSG00000075390	-1.28836	0.0044248	0.0549232	Rpl36-ps8
ENSMUSG00000045273	-1.29074	0.000906095	0.0166145	Cenph	CENTROMERE H CENP H
ENSMUSG00000025157	-1.29234	5.175e-05	0.00170567	Zdhhc16	PROBABLE PALMITOYLTRANSFERASE ZDHHC16 EC_2.3.1.- ZINC FINGER DHHC DOMAIN CONTAINING 16 DHHC 16
ENSMUSG00000032103	-1.29414	0.000136346	0.00369713	Pus3	TRNA PSEUDOURIDINE 38/39 SYNTHASE EC_5.4.99.45 TRNA PSEUDOURIDINE SYNTHASE 3 TRNA PSEUDOURIDYLATE SYNTHASE 3 TRNA URIDINE ISOMERASE 3
ENSMUSG00000083974	-1.29451	0.000224107	0.00545113	Gm16053
ENSMUSG00000032698	-1.29513	1.07957e-05	0.000471792	Lmo2	RHOMBOTIN 2 LIM DOMAIN ONLY 2 LMO 2
ENSMUSG00000032478	-1.29572	2.63317e-05	0.000977967	Nme6	NUCLEOSIDE DIPHOSPHATE KINASE 6 NDK 6 NDP KINASE 6 EC_2.7.4.6
ENSMUSG00000022663	-1.29579	0.000759888	0.0145438	Atg3	UBIQUITIN CONJUGATING ENZYME ATG3 EC_6.3.2.- AUTOPHAGY RELATED 3 APG3
ENSMUSG00000020894	-1.29604	8.42202e-05	0.00251806	Vamp2	VESICLE ASSOCIATED MEMBRANE 2 VAMP 2 SYNAPTOBREVIN 2
ENSMUSG00000067928	-1.29814	0.000308884	0.00711085	Zfp760	ZINC FINGER
ENSMUSG00000025925	-1.29871	0.000633911	0.0125258	Terf1	TELOMERIC REPEAT BINDING FACTOR 1 TTAGGG REPEAT BINDING FACTOR 1
ENSMUSG00000071350	-1.2993	0.000220941	0.0053958	Setdb2	HISTONE LYSINE N METHYLTRANSFERASE SETDB2 EC_2.1.1.43 CHRONIC LYMPHOCYTIC LEUKEMIA DELETION REGION GENE 8 SET DOMAIN BIFURCATED 2
ENSMUSG00000060038	-1.3001	1.33927e-05	0.000559187	Dhps	DEOXYHYPUSINE SYNTHASE DHS EC_2.5.1.46
ENSMUSG00000050891	-1.30047	0.00122991	0.0210467	Tatdn1	DEOXYRIBONUCLEASE EC_3.1.21.-
ENSMUSG00000070031	-1.3009	1.11389e-05	0.000482134	Sp140	NUCLEAR BODY SP140 LYMPHOID RESTRICTED HOMOLOG OF SP100 LYSP100 NUCLEAR AUTOANTIGEN SP 140 SPECKLED 140 KDA
ENSMUSG00000017713	-1.30189	5.68689e-05	0.00183189	Tha1	UNCHARACTERIZED R102 4
ENSMUSG00000022711	-1.30299	3.05635e-05	0.00111461	Pmm2	PHOSPHOMANNOMUTASE PMM EC_5.4.2.8
ENSMUSG00000032174	-1.30466	0.00107215	0.0189313	Icam5	INTERCELLULAR ADHESION MOLECULE 5 PRECURSOR ICAM 5 TELENCEPHALIN
ENSMUSG00000096210	-1.30485	4.23569e-05	0.0014691	H1f0	HISTONE H1 0 HISTONE H1 0
ENSMUSG00000034959	-1.30505	0.000391975	0.00860801	5031414D18Rik	RUN DOMAIN BECLIN 1 INTERACTING AND CYSTEINE RICH CONTAINING RUBICON
ENSMUSG00000056888	-1.30588	0.00141949	0.0233912	Glipr1	GLIOMA PATHOGENESIS RELATED 1 PRECURSOR GLIPR 1
ENSMUSG00000008496	-1.30777	0.00510077	0.0609605	Pou2f2	POU DOMAIN CLASS 2 TRANSCRIPTION FACTOR OCTAMER BINDING OCT OCTAMER BINDING TRANSCRIPTION FACTOR OTF
ENSMUSG00000040860	-1.30946	0.00132653	0.0223273	Crocc	CILIARY ROOTLET COILED COIL
ENSMUSG00000020493	-1.31041	0.00775355	0.082982	Prr11	PROLINE RICH 11
ENSMUSG00000031700	-1.31317	6.55599e-05	0.00206616	Gpt2	ALANINE AMINOTRANSFERASE 2 ALT2 EC_2.6.1.2 GLUTAMATE PYRUVATE TRANSAMINASE 2 GPT 2 GLUTAMIC ALANINE TRANSAMINASE 2 GLUTAMIC PYRUVIC TRANSAMINASE 2
ENSMUSG00000024036	-1.3132	0.000178057	0.00456832	Slc37a1	SUGAR PHOSPHATE EXCHANGER SOLUTE CARRIER FAMILY 37 MEMBER
ENSMUSG00000022322	-1.31362	0.000153846	0.00409127	Shcbp1	SHC SH2 DOMAIN BINDING 1
ENSMUSG00000078945	-1.31371	2.29084e-05	0.00087563	Naip2	BACULOVIRAL IAP REPEAT CONTAINING NEURONAL APOPTOSIS INHIBITORY
ENSMUSG00000070953	-1.31432	9.94474e-05	0.00288453	Rabepk	RAB9 EFFECTOR WITH KELCH MOTIFS
ENSMUSG00000027555	-1.31522	2.97786e-05	0.00109206	Car13	CARBONIC ANHYDRASE EC_4.2.1.1 CARBONATE DEHYDRATASE CARBONIC ANHYDRASE CA
ENSMUSG00000020752	-1.31545	8.11465e-05	0.00244568	Recql5	ATP DEPENDENT DNA HELICASE Q5 EC_3.6.4.12 DNA HELICASE RECQ TYPE 5 RECQ5 RECQ 5
ENSMUSG00000031816	-1.31849	4.26208e-05	0.00147435	Mthfsd	METHENYLTETRAHYDROFOLATE SYNTHASE DOMAIN CONTAINING
ENSMUSG00000034035	-1.3199	0.00614409	0.0697119	Ccdc17	COILED COIL DOMAIN CONTAINING 17
ENSMUSG00000027423	-1.3222	6.09427e-05	0.0019393	Snx5	SORTING NEXIN
ENSMUSG00000081476	-1.32273	0.00108237	0.019022	Itpa-ps1
ENSMUSG00000003283	-1.32274	8.3342e-06	0.000382716	Hck	TYROSINE KINASE EC_2.7.10.2
ENSMUSG00000038637	-1.32306	0.00859645	0.0893765	Lrrc56	LEUCINE RICH REPEAT CONTAINING 56
ENSMUSG00000007035	-1.32307	0.000945099	0.0171709	Msh5	MUTS HOMOLOG 5
ENSMUSG00000055632	-1.32423	0.000633408	0.0125253	Hmcn2	HEMICENTIN PRECURSOR
ENSMUSG00000053687	-1.32739	0.00650991	0.0726998	Dpep2	DIPEPTIDASE EC_3.4.13.19
ENSMUSG00000007036	-1.32994	1.28643e-05	0.00053884	Abhd16a	ABHYDROLASE DOMAIN CONTAINING 16A EC 3 HLA B ASSOCIATED TRANSCRIPT 5
ENSMUSG00000029034	-1.33007	1.06641e-05	0.000466819	Cpsf3l	INTEGRATOR COMPLEX SUBUNIT 11 INT11 EC_3.1.27.- CLEAVAGE AND POLYADENYLATION SPECIFIC FACTOR 3 CPSF3
ENSMUSG00000092438	-1.33036	0.00169954	0.0268848	Gm18734
ENSMUSG00000028678	-1.3306	0.00153714	0.0249383	Kif2c	KINESIN
ENSMUSG00000000409	-1.33411	0.000122832	0.00339028	Lck	TYROSINE KINASE EC_2.7.10.2
ENSMUSG00000026196	-1.33534	0.00389719	0.0500432	Bard1	BRCA1 ASSOCIATED RING DOMAIN 1 BARD 1 EC_6.3.2.-
ENSMUSG00000022216	-1.34027	5.48092e-05	0.00178307	Psme1	PROTEASOME ACTIVATOR COMPLEX SUBUNIT 11S REGULATOR COMPLEX SUBUNIT REG ACTIVATOR OF MULTICATALYTIC PROTEASE SUBUNIT PROTEASOME ACTIVATOR 28 SUBUNIT
ENSMUSG00000082464	-1.34125	0.0073827	0.0799791	Rab9b-ps1
ENSMUSG00000022126	-1.34359	6.01916e-05	0.00192005	Irg1	IMMUNE RESPONSIVE GENE 1
ENSMUSG00000025287	-1.34406	1.93878e-05	0.000765612	Acot9	ACYL COENZYME A THIOESTERASE MITOCHONDRIAL PRECURSOR ACYL COA THIOESTERASE EC_3.1.2.- MITOCHONDRIAL 48 KDA ACYL COA THIOESTER HYDROLASE MT ACT48
ENSMUSG00000057554	-1.34419	3.04715e-05	0.00111387	Lgals8	GALECTIN GAL
ENSMUSG00000005481	-1.34518	2.55175e-05	0.000954487	Ddx39	ATP DEPENDENT RNA HELICASE SUB2 EC_3.6.4.13
ENSMUSG00000090468	-1.34584	0.000187866	0.00477791	Gm2840	INTERFERON INDUCED TRANSMEMBRANE DISPANIN SUBFAMILY A MEMBER
ENSMUSG00000089716	-1.34736	0.000503768	0.010559	Gm6264
ENSMUSG00000024132	-1.34859	7.30178e-05	0.00223601	Eci1	ENOYL COA DELTA ISOMERASE 1 MITOCHONDRIAL PRECURSOR EC_5.3.3.8 3 2 TRANS ENOYL COA ISOMERASE DELTA 3 DELTA 2 ENOYL COA ISOMERASE D3 D2 ENOYL COA ISOMERASE DODECENOYL COA ISOMERASE
ENSMUSG00000056116	-1.34882	0.00838051	0.0877577	H2-T22	H 2 CLASS I HISTOCOMPATIBILITY ANTIGEN ALPHA CHAIN
ENSMUSG00000022092	-1.34929	0.000102154	0.00294114	Ppp3cc	SERINE/THREONINE PHOSPHATASE 2B CATALYTIC SUBUNIT EC_3.1.3.16 CAM PRP CATALYTIC SUBUNIT CALMODULIN DEPENDENT CALCINEURIN A SUBUNIT
ENSMUSG00000012609	-1.34931	4.20366e-05	0.00145992	Ttll5	TUBULIN POLYGLUTAMYLASE EC 6 TUBULIN TYROSINE LIGASE
ENSMUSG00000005501	-1.351	3.09887e-05	0.0011265	Usp40	UBIQUITIN CARBOXYL TERMINAL HYDROLASE 40 EC_3.4.19.12 DEUBIQUITINATING ENZYME 40 UBIQUITIN THIOESTERASE 40 UBIQUITIN SPECIFIC PROCESSING PROTEASE 40
ENSMUSG00000025059	-1.35118	3.24437e-06	0.000175403	Gyk	GLYCEROL KINASE GK GLYCEROKINASE EC_2.7.1.30 ATP:GLYCEROL 3 PHOSPHOTRANSFERASE
ENSMUSG00000022210	-1.3522	0.000302179	0.0069626	Dhrs4	DEHYDROGENASE/REDUCTASE SDR FAMILY MEMBER 4 EC_1.1.1.184 NADPH DEPENDENT CARBONYL REDUCTASE/NADP RETINOL DEHYDROGENASE CR PHCR NADPH DEPENDENT RETINOL DEHYDROGENASE/REDUCTASE NDRD PEROXISOMAL SHORT CHAIN ALCOHOL DEHYDROGENASE PSCD
ENSMUSG00000079889	-1.35286	0.000213259	0.00527038	Gm11951
ENSMUSG00000083397	-1.35371	0.000710992	0.0136879	Gm5466
ENSMUSG00000022179	-1.35372	8.41544e-05	0.00251806	4931414P19Rik	UNCHARACTERIZED PRECURSOR
ENSMUSG00000033355	-1.35392	0.000155938	0.00413457	Rtp4	RECEPTOR TRANSPORTING 4.28 KDA INTERFERON RESPONSIVE
ENSMUSG00000004018	-1.35421	9.3031e-05	0.00273471	Fancl	E3 UBIQUITIN LIGASE FANCL EC_6.3.2.- FANCONI ANEMIA GROUP L OF
ENSMUSG00000040760	-1.35503	8.54813e-05	0.00254709	Appl1	DCC INTERACTING 13 DIP13 ADAPTER CONTAINING PH DOMAIN PTB DOMAIN AND LEUCINE ZIPPER MOTIF
ENSMUSG00000001755	-1.35508	4.28666e-05	0.0014809	Coasy	BIFUNCTIONAL COENZYME A SYNTHASE COA SYNTHASE NBP POV 2 [INCLUDES PHOSPHOPANTETHEINE ADENYLYLTRANSFERASE EC_2.7.7.3 DEPHOSPHO COA PYROPHOSPHORYLASE PANTETHEINE PHOSPHATE ADENYLYLTRANSFERASE PPAT ; DEPHOSPHO COA KINASE DPCK EC_2.7.1.- 24 DEPHOSPHOCOENZYME
ENSMUSG00000073678	-1.35534	0.000198897	0.00497642	Pgap1	GPI INOSITOL DEACYLASE EC_3.1.-.- POST GPI ATTACHMENT TO PROTEINS FACTOR 1
ENSMUSG00000030082	-1.35551	0.000163966	0.00430086	Sec61a1	TRANSPORT SEC61 SUBUNIT ALPHA
ENSMUSG00000022747	-1.35606	0.00046149	0.00983347	St3gal6	CMP N ACETYLNEURAMINATE BETA GALACTOSAMIDE ALPHA 2 3 SIALYLTRANSFERASE 4 ALPHA 2 3 ST 4 BETA GALACTOSIDE ALPHA 2 3 SIALYLTRANSFERASE 4 EC_2.4.99.- ALPHA 2 3 SIALYLTRANSFERASE IV GAL BETA 1 4 GALNAC ALPHA 2 3 SIALYLTRANSFERASE ST3GAL IV ST3GALIV SIALYLTRAN
ENSMUSG00000040552	-1.35614	1.52028e-05	0.000620924	C3ar1	C3A ANAPHYLATOXIN CHEMOTACTIC RECEPTOR C3AR C3A R
ENSMUSG00000026873	-1.35779	4.79147e-05	0.00161487	Phf19	METAL RESPONSE ELEMENT BINDING TRANSCRIPTION FACTOR 2 METAL REGULATORY TRANSCRIPTION FACTOR 2
ENSMUSG00000053820	-1.35894	0.00528464	0.062514	Bcl2a1c	BCL 2 RELATED A1 HEMOPOIETIC SPECIFIC EARLY RESPONSE PROTEIN BFL 1
ENSMUSG00000048574	-1.36095	0.000212651	0.0052603	Gm5593
ENSMUSG00000036323	-1.36199	1.36274e-05	0.000564494	Srp72	SIGNAL RECOGNITION PARTICLE SUBUNIT SRP72 SRP72 SIGNAL RECOGNITION PARTICLE 72 KDA
ENSMUSG00000053012	-1.36283	0.000108115	0.00308139	Krcc1	LYSINE RICH COILED COIL 1
ENSMUSG00000037572	-1.36431	1.87959e-05	0.000746738	Wdhd1	WD REPEAT AND HMG BOX DNA BINDING 1 ACIDIC NUCLEOPLASMIC DNA BINDING 1 AND 1
ENSMUSG00000094017	-1.36572	0.000105407	0.00302725	Gm13160
ENSMUSG00000039233	-1.36639	1.72191e-05	0.000688265	Tbce	TUBULIN SPECIFIC CHAPERONE E TUBULIN FOLDING COFACTOR E
ENSMUSG00000059830	-1.36705	0.000782523	0.0148148	Gm16380	APOPTOSIS REGULATORY SIVA CD27 BINDING CD27BP
ENSMUSG00000031660	-1.36886	3.08614e-05	0.00112391	Brd7	BROMODOMAIN CONTAINING 7
ENSMUSG00000020680	-1.37117	2.5914e-05	0.00096656	Taf15	RNA BINDING
ENSMUSG00000004665	-1.37118	0.000612871	0.012202	Cnn2	CALPONIN CALPONIN SMOOTH MUSCLE
ENSMUSG00000020952	-1.37182	1.42488e-05	0.000587448	Scfd1	SLY1
ENSMUSG00000039934	-1.37189	0.000564525	0.0114684	Gsap	GAMMA SECRETASE ACTIVATING GSAP PIGEON HOMOLOG [CONTAINS GAMMA SECRETASE ACTIVATING 16 KDA C TERMINAL FORM GSAP 16K ]
ENSMUSG00000097519	-1.37319	0.00788486	0.0838058	AC161493.1
ENSMUSG00000083890	-1.37426	0.000253467	0.00605296	Gm15703
ENSMUSG00000071286	-1.37711	2.62717e-05	0.00097712	Sowahc
ENSMUSG00000049932	-1.37722	0.00544507	0.063996	H2afx	HISTONE H2A
ENSMUSG00000027953	-1.37848	2.38617e-05	0.000905466	Slc50a1	SUGAR TRANSPORTER SWEET1 SOLUTE CARRIER FAMILY 50 MEMBER 1
ENSMUSG00000035941	-1.37866	1.44953e-05	0.000595739	Ibtk	INHIBITOR OF BRUTON TYROSINE KINASE IBTK
ENSMUSG00000003779	-1.38	0.000138933	0.00375176	Kif20a	KINESIN KIF20B KINESIN RELATED MOTOR INTERACTING WITH PIN1 M PHASE PHOSPHOPROTEIN 1 MPP1
ENSMUSG00000020696	-1.38363	0.00292259	0.0401974	Rffl	E3 UBIQUITIN LIGASE EC_6.3.2.- RING FINGER
ENSMUSG00000024542	-1.38658	4.35207e-05	0.00149366	Cep192	UNKNOWN
ENSMUSG00000026000	-1.38661	2.28741e-05	0.000875595	Lancl1	LANC
ENSMUSG00000073529	-1.38685	0.000119024	0.00331308	F830208F22Rik
ENSMUSG00000022364	-1.38715	5.04034e-05	0.00167719	Wdr67	WD REPEAT CONTAINING 67
ENSMUSG00000000915	-1.38753	0.00731146	0.0794115	Hip1r	HUNTINGTIN INTERACTING 1 HIP 1 HUNTINGTIN INTERACTING I HIP I
ENSMUSG00000059456	-1.38798	3.6137e-06	0.000193772	Ptk2b	FOCAL ADHESION KINASE 1 FADK 1 EC_2.7.10.2 FOCAL ADHESION KINASE RELATED NONKINASE FRNK TYROSINE KINASE 2 P125FAK PP125FAK
ENSMUSG00000034793	-1.38897	6.52601e-06	0.000311691	G6pc3	GLUCOSE 6 PHOSPHATASE G 6 PASE G6PASE EC_3.1.3.9
ENSMUSG00000032673	-1.39015	0.00279043	0.0389398	Prorsd1	PROLYL TRNA SYNTHETASE ASSOCIATED DOMAIN CONTAINING 1 PRDX DEACYLASE DOMAIN CONTAINING 1 PROLYL TRNA SYNTHETASE ASSOCIATED DOMAIN CONTAINING 1 PSEUDOGENE
ENSMUSG00000058240	-1.39138	2.17983e-05	0.000843027	Cryzl1	QUINONE OXIDOREDUCTASE 1 QUINONE OXIDOREDUCTASE HOMOLOG 1 QOH 1 ZETA CRYSTALLIN HOMOLOG
ENSMUSG00000033031	-1.39389	2.17028e-05	0.000840575	C330027C09Rik	CIP2A CANCEROUS INHIBITOR OF PP2A P90 AUTOANTIGEN
ENSMUSG00000036775	-1.39577	0.00013837	0.00374041	Decr2	PEROXISOMAL 2 4 DIENOYL COA REDUCTASE EC_1.3.1.34 2 4 DIENOYL COA REDUCTASE 2
ENSMUSG00000001403	-1.39579	3.16304e-05	0.00114555	Ube2c	UBIQUITIN CONJUGATING ENZYME E2 C EC_6.3.2.19 UBIQUITIN CARRIER C UBIQUITIN LIGASE C
ENSMUSG00000002307	-1.39622	4.18829e-06	0.000219204	Daxx	DEATH DOMAIN ASSOCIATED 6 DAXX
ENSMUSG00000069830	-1.39697	0.000413264	0.00900017	Nlrp1a	CASPASE RECRUITMENT DOMAIN CONTAINING
ENSMUSG00000041720	-1.39762	5.28883e-06	0.000263147	Pi4ka	PHOSPHATIDYLINOSITOL 4 KINASE PI4 KINASE PTDINS 4 KINASE EC_2.7.1.67
ENSMUSG00000061458	-1.39777	1.57695e-05	0.000642067	Nol10	NUCLEOLAR 10
ENSMUSG00000051435	-1.40096	0.00831999	0.0871936	Fhad1	FORKHEAD ASSOCIATED DOMAIN CONTAINING 1 FHA DOMAIN CONTAINING 1
ENSMUSG00000037851	-1.40197	2.25814e-05	0.000868193	Iars	ISOLEUCINE TRNA LIGASE CYTOPLASMIC EC_6.1.1.5 ISOLEUCYL TRNA SYNTHETASE ILERS
ENSMUSG00000010358	-1.40231	0.00237263	0.0348319	Ifi35	UNKNOWN
ENSMUSG00000041231	-1.40324	0.000121128	0.00335739	Ublcp1	UBIQUITIN DOMAIN CONTAINING CTD PHOSPHATASE 1 EC_3.1.3.16 NUCLEAR PROTEASOME INHIBITOR UBLCP1
ENSMUSG00000038252	-1.40377	5.17527e-05	0.00170567	Ncapd2	CONDENSIN COMPLEX SUBUNIT 1 CHROMOSOME CONDENSATION RELATED SMC ASSOCIATED 1 CHROMOSOME ASSOCIATED D2 D2 NON SMC CONDENSIN I COMPLEX SUBUNIT D2 XCAP D2 HOMOLOG
ENSMUSG00000066861	-1.40404	0.000310856	0.00714532	Oas1g	2' 5' OLIGOADENYLATE SYNTHASE 2 5' OLIGO A SYNTHASE 2 5A SYNTHASE EC_2.7.7.84
ENSMUSG00000021843	-1.40604	5.39608e-05	0.00176422	Ktn1	KINECTIN
ENSMUSG00000083640	-1.40706	0.000394908	0.00866516	Gm8876
ENSMUSG00000020705	-1.40733	3.23336e-06	0.000175169	Ddx42	PRE PROCESSING ATP DEPENDENT RNA HELICASE PRP5 EC_3.6.4.13
ENSMUSG00000063268	-1.40894	1.22049e-05	0.000517003	Parp10	POLY [ADP RIBOSE] POLYMERASE 10 PARP 10 EC_2.4.2.30 ADP RIBOSYLTRANSFERASE DIPHTHERIA TOXIN 10 ARTD10
ENSMUSG00000021120	-1.41152	8.91386e-05	0.0026321	Pigh	PHOSPHATIDYLINOSITOL N ACETYLGLUCOSAMINYLTRANSFERASE SUBUNIT H EC_2.4.1.198 PHOSPHATIDYLINOSITOL GLYCAN BIOSYNTHESIS CLASS H PIG H
ENSMUSG00000074136	-1.41196	0.00545394	0.0640429	4930513N10Rik
ENSMUSG00000028252	-1.41253	7.96151e-06	0.000368832	Ccnc	CYCLIN C
ENSMUSG00000032409	-1.41287	0.000113814	0.00320207	Atr	SERINE/THREONINE KINASE MEC1 EC_2.7.11.1 ATR HOMOLOG DNA DAMAGE CHECKPOINT KINASE MEC1 MITOSIS ENTRY CHECKPOINT 1
ENSMUSG00000005378	-1.41419	1.23035e-05	0.000518535	Wbscr22	UNCHARACTERIZED METHYLTRANSFERASE WBSCR22 EC_2.1.1.- WILLIAMS BEUREN SYNDROME CHROMOSOMAL REGION 22
ENSMUSG00000061533	-1.41439	7.30812e-05	0.00223601	Cep128	UNKNOWN
ENSMUSG00000051378	-1.41484	0.000102184	0.00294114	Kif18b	KINESIN
ENSMUSG00000023066	-1.41649	0.000801689	0.0150905	Rttn	ROTATIN
ENSMUSG00000027580	-1.41705	0.00131174	0.0222047	Helz2	HELICASE WITH ZINC FINGER DOMAIN 2 ATP DEPENDENT HELICASE PRIC285 HELICASE WITH ZINC FINGER 2 TRANSCRIPTIONAL COACTIVATOR PPAR ALPHA INTERACTING COMPLEX 285 PPAR GAMMA DNA BINDING DOMAIN INTERACTING 1 PDIP1 PPAR GAMMA DBD INTERACTING 1 PEROXISOMAL PROLIFE
ENSMUSG00000061286	-1.41871	1.11372e-05	0.000482134	Exosc5	EXOSOME COMPLEX COMPONENT RRP46 EXOSOME COMPONENT 5 RIBOSOMAL RNA PROCESSING 46
ENSMUSG00000015950	-1.42097	5.32822e-06	0.000264605	Ncf1	NEUTROPHIL CYTOSOL FACTOR 1 NCF 1.47 KDA NEUTROPHIL OXIDASE FACTOR NCF 47K NEUTROPHIL NADPH OXIDASE FACTOR 1 P47 PHOX
ENSMUSG00000034118	-1.42198	0.000130582	0.00358158	Tpst1	TYROSINE SULFOTRANSFERASE EC_2.8.2.20 TYROSYLPROTEIN SULFOTRANSFERASE TPST
ENSMUSG00000007029	-1.42242	6.67434e-06	0.000317618	Vars	VALINE TRNA LIGASE EC_6.1.1.9 VALYL TRNA SYNTHETASE VALRS
ENSMUSG00000061559	-1.42254	6.12292e-06	0.000297313	Wdr61	WD REPEAT CONTAINING 61
ENSMUSG00000075704	-1.42304	3.53563e-06	0.000189975	Txnrd2	THIOREDOXIN REDUCTASE EC_1.8.1.9 THIOREDOXIN REDUCTASE
ENSMUSG00000005470	-1.42409	3.87471e-05	0.00136009	Asf1b	HISTONE CHAPERONE ANTI SILENCING FUNCTION 1
ENSMUSG00000026946	-1.42509	4.32352e-05	0.00148971	Nmi	N MYC INTERACTOR NMI N MYC AND STAT INTERACTOR
ENSMUSG00000003549	-1.42641	0.000330036	0.00748606	Ercc1	DNA EXCISION REPAIR ERCC 1
ENSMUSG00000024654	-1.42845	7.09211e-05	0.00218779	Asrgl1	ISOASPARTYL PEPTIDASE/L ASPARAGINASE PRECURSOR EC_3.4.19.5 EC_3.5.1.- 1 ASPARAGINASE 1 BETA ASPARTYL PEPTIDASE ISOASPARTYL DIPEPTIDASE L ASPARAGINE AMIDOHYDROLASE [CONTAINS ISOASPARTYL PEPTIDASE/L ASPARAGINASE ALPHA CHAIN; ISOASPARTYL PEPTIDASE/L ASPARAG
ENSMUSG00000004936	-1.4298	2.80139e-06	0.000156288	Map2k1	DUAL SPECIFICITY MITOGEN ACTIVATED KINASE KINASE MAP KINASE KINASE MAPKK EC_2.7.12.2 ERK ACTIVATOR KINASE MAPK/ERK KINASE
ENSMUSG00000080981	-1.42994	0.00882911	0.091109	Gm12161
ENSMUSG00000054716	-1.4339	1.02504e-05	0.000453141	Zfp771	ZINC FINGER 771
ENSMUSG00000031711	-1.4349	3.63102e-06	0.000193908	Zfp330	ZINC FINGER 330 NUCLEOLAR AUTOANTIGEN 36
ENSMUSG00000056394	-1.43788	4.46651e-05	0.00152784	Lig1	DNA LIGASE 1 EC_6.5.1.1 DNA LIGASE I POLYDEOXYRIBONUCLEOTIDE SYNTHASE [ATP] 1
ENSMUSG00000055994	-1.43796	3.76401e-06	0.00019979	Nod2	NUCLEOTIDE BINDING OLIGOMERIZATION DOMAIN CONTAINING CASPASE RECRUITMENT DOMAIN CONTAINING
ENSMUSG00000035842	-1.43894	4.9805e-05	0.00166218	Ddx11	ATP DEPENDENT RNA HELICASE CHL1 EC_3.6.4.13 CHROMOSOME LOSS 1
ENSMUSG00000029559	-1.43906	8.4479e-06	0.000386584	2210016L21Rik	UNCHARACTERIZED
ENSMUSG00000087367	-1.44181	0.00146138	0.0239353	Gm15491
ENSMUSG00000069874	-1.44288	2.28363e-05	0.000875424	Irgm2	IMMUNITY RELATED GTPASE FAMILY M EC_3.6.5.- GTPASE INTERFERON INDUCIBLE 1 LPS STIMULATED RAW 264 7 MACROPHAGE 47 LRG 47
ENSMUSG00000032089	-1.44328	5.02791e-06	0.000253046	Il10ra	INTERLEUKIN 10 RECEPTOR SUBUNIT ALPHA PRECURSOR IL 10 RECEPTOR SUBUNIT ALPHA IL 10R SUBUNIT ALPHA IL 10RA CDW210A INTERLEUKIN 10 RECEPTOR SUBUNIT 1 IL 10R SUBUNIT 1 IL 10R1 CD210 ANTIGEN
ENSMUSG00000033880	-1.44426	6.90601e-05	0.00214213	Lgals3bp	GALECTIN 3 BINDING PRECURSOR LECTIN GALACTOSIDE BINDING SOLUBLE 3 BINDING
ENSMUSG00000030592	-1.44534	1.83662e-05	0.000730776	Ryr1	RYANODINE RECEPTOR 1 RYR 1 RYR1 SKELETAL MUSCLE CALCIUM RELEASE CHANNEL SKELETAL MUSCLE RYANODINE RECEPTOR SKELETAL MUSCLE TYPE RYANODINE RECEPTOR TYPE 1 RYANODINE RECEPTOR
ENSMUSG00000027605	-1.44672	6.38658e-06	0.000306147	Acss2	ACETYL COENZYME A SYNTHETASE EC_6.2.1.1 ACETATE COA LIGASE ACYL ACTIVATING ENZYME
ENSMUSG00000029366	-1.44738	4.45149e-06	0.000230677	Dck	DEOXYCYTIDINE KINASE DCK EC_2.7.1.74
ENSMUSG00000039577	-1.44869	0.000204788	0.00509949	Nphp4	NEPHROCYSTIN 4 NEPHRORETININ
ENSMUSG00000071456	-1.44886	8.59983e-06	0.000391486	1110002L01Rik	UNCHARACTERIZED FRAGMENT
ENSMUSG00000033126	-1.44933	0.000415361	0.00903083	Ybey	RIBONUCLEASE
ENSMUSG00000022199	-1.45009	0.000273407	0.00645856	Slc22a17	SOLUTE CARRIER FAMILY 22 MEMBER 17 24P3 RECEPTOR 24P3R LIPOCALIN 2 RECEPTOR
ENSMUSG00000028885	-1.45079	8.19811e-07	5.40487e-05	Smpdl3b	ACID SPHINGOMYELINASE PHOSPHODIESTERASE PRECURSOR ASM PHOSPHODIESTERASE EC_3.1.4.-
ENSMUSG00000035004	-1.45151	0.00791005	0.0839739	Igsf6	IMMUNOGLOBULIN SUPERFAMILY MEMBER 6 PRECURSOR IGSF6
ENSMUSG00000057103	-1.4524	0.00536362	0.0632628	Cml1	N ACETYLTRANSFERASE EC_2.3.1.- CAMELLO
ENSMUSG00000024906	-1.45389	2.46677e-06	0.000140003	Mus81	CROSSOVER JUNCTION ENDONUCLEASE MUS81 EC_3.1.22.-
ENSMUSG00000002332	-1.45433	4.48405e-06	0.000231194	Dhrs1	DEHYDROGENASE/REDUCTASE SDR FAMILY MEMBER 1 EC_1.1.-.-
ENSMUSG00000027272	-1.45538	7.25794e-06	0.000340448	Ubr1	E3 UBIQUITIN LIGASE UBR2 EC_6.3.2.- N RECOGNIN 2 UBIQUITIN LIGASE E3 ALPHA 2 UBIQUITIN LIGASE E3 ALPHA II
ENSMUSG00000022033	-1.45552	0.00397862	0.0508399	Pbk	LYMPHOKINE ACTIVATED KILLER T CELL ORIGINATED KINASE EC_2.7.12.2 PDZ BINDING KINASE T LAK CELL ORIGINATED KINASE
ENSMUSG00000021461	-1.45897	2.00621e-05	0.00078632	Fancc	FANCONI ANEMIA GROUP C FACC
ENSMUSG00000020492	-1.45942	0.00201129	0.0307331	Ska2	SPINDLE AND KINETOCHORE ASSOCIATED 2 FAM33A
ENSMUSG00000036918	-1.46218	2.03911e-05	0.000794465	Ttc7	TETRATRICOPEPTIDE REPEAT TPR REPEAT
ENSMUSG00000006464	-1.46314	0.000221247	0.0053965	Bbs1	BARDET BIEDL SYNDROME 1 BBS2 2
ENSMUSG00000028797	-1.46388	8.13779e-06	0.000375562	Tmem234	TRANSMEMBRANE 234
ENSMUSG00000060131	-1.46499	1.82352e-06	0.000108917	Atp8b4	PROBABLE PHOSPHOLIPID TRANSPORTING ATPASE EC_3.6.3.1 ATPASE CLASS I TYPE 8B MEMBER
ENSMUSG00000006241	-1.46503	0.0030783	0.0417804	Ccdc159	COILED COIL DOMAIN CONTAINING 159
ENSMUSG00000022540	-1.46554	7.20367e-06	0.000339116	Rogdi	ROGDI HOMOLOG
ENSMUSG00000037759	-1.4656	0.00355208	0.0466628	Ptger2	PROSTAGLANDIN RECEPTOR RECEPTOR RECEPTOR PROSTANOID RECEPTOR
ENSMUSG00000024338	-1.46575	4.43099e-06	0.000230069	Psmb8	PROTEASOME SUBUNIT BETA TYPE PRECURSOR EC_3.4.25.1 MACROPAIN MULTICATALYTIC ENDOPEPTIDASE COMPLEX PROTEASOME PROTEASOME SUBUNIT
ENSMUSG00000029385	-1.46685	0.00679773	0.0749109	Ccng2	CYCLIN
ENSMUSG00000002020	-1.47195	0.00107313	0.0189358	Ltbp2	LATENT TRANSFORMING GROWTH FACTOR BETA BINDING PRECURSOR LTBP
ENSMUSG00000040591	-1.47225	3.70428e-05	0.00131434	1110051M20Rik	UNKNOWN
ENSMUSG00000030346	-1.47274	2.41613e-05	0.00091419	Rad51ap1	RAD51 ASSOCIATED 1 RAD51 INTERACTING
ENSMUSG00000029605	-1.47544	1.85908e-06	0.000110789	Oas1b
ENSMUSG00000052821	-1.47576	1.34993e-05	0.000560071	Cysltr1	CYSTEINYL LEUKOTRIENE RECEPTOR
ENSMUSG00000036223	-1.47593	0.000169004	0.00439622	Ska1	SPINDLE AND KINETOCHORE ASSOCIATED 1
ENSMUSG00000028687	-1.47628	0.000451786	0.00969265	Mutyh	A/G SPECIFIC ADENINE DNA GLYCOSYLASE EC_3.2.2.- MUTY HOMOLOG
ENSMUSG00000030677	-1.48211	7.00452e-05	0.00216842	Kif22	KINESIN KIF22
ENSMUSG00000051705	-1.48494	0.00017241	0.00445502	Senp8	SENTRIN SPECIFIC PROTEASE 8 EC_3.4.22.68 DENEDDYLASE 1 NEDD8 SPECIFIC PROTEASE 1 SENTRIN/SUMO SPECIFIC PROTEASE SENP8
ENSMUSG00000030867	-1.48602	4.98253e-05	0.00166218	Plk1	SERINE/THREONINE KINASE EC_2.7.11.21 POLO KINASE PLK
ENSMUSG00000082500	-1.48671	0.00964233	0.0973177	Gm15195
ENSMUSG00000025403	-1.48767	1.70827e-06	0.000102735	Shmt2	SERINE HYDROXYMETHYLTRANSFERASE SHMT EC_2.1.2.1 GLYCINE HYDROXYMETHYLTRANSFERASE SERINE METHYLASE
ENSMUSG00000024835	-1.48866	0.000399369	0.00873383	Coro1b	CORONIN
ENSMUSG00000021816	-1.48929	6.27734e-06	0.000303127	Ppp3cb	SERINE/THREONINE PHOSPHATASE 2B CATALYTIC SUBUNIT EC_3.1.3.16 CAM PRP CATALYTIC SUBUNIT CALMODULIN DEPENDENT CALCINEURIN A SUBUNIT
ENSMUSG00000027715	-1.49108	0.000327695	0.0074523	Ccna2	CYCLIN A
ENSMUSG00000051506	-1.49201	1.14389e-06	7.15848e-05	Wdfy4	WD REPEAT AND FYVE DOMAIN CONTAINING 3 FYVE
ENSMUSG00000055633	-1.49207	0.000945453	0.0171709	Zfp580	ZINC FINGER 580
ENSMUSG00000029176	-1.49263	4.67862e-06	0.000239138	Anapc4	ANAPHASE PROMOTING COMPLEX SUBUNIT 4 APC4 CYCLOSOME SUBUNIT 4
ENSMUSG00000032596	-1.49563	0.00072557	0.0139378	Uba7	UBIQUITIN MODIFIER ACTIVATING ENZYME UBIQUITIN ACTIVATING ENZYME E1
ENSMUSG00000091994	-1.49706	0.00200448	0.0306756	E130317F20Rik
ENSMUSG00000074635	-1.49835	0.00269054	0.0379907	3110070M22Rik	UNKNOWN
ENSMUSG00000083519	-1.49876	0.00125278	0.0213307	Gm13674
ENSMUSG00000028438	-1.49888	6.16085e-05	0.00195337	Kif24	KINESIN
ENSMUSG00000085761	-1.50215	0.000583573	0.0117711	4930455G09Rik
[truncated: 618 more rows]
