# Supplementary material for: Regulation of Toll-like Receptor Signaling by the SF3a mRNA Splicing Complex
Source: PLoS Genet. 2015 Feb 6;11(2):e1004932. doi: 10.1371/journal.pgen.1004932 (PMC4450051; doi:10.1371/journal.pgen.1004932)
Supplement: S19 Table — MISO Global Splicing Analysis. (XLSX) [file pgen.1004932.s021.xlsx]

## Sheet: signifeventscounts
Table S19. SF3A1 inhibition enhances alternate mRNA splicing
Category/Comparison	Events (n)*	Annoted events	Events (%)
Retained introns		3260
CT - LPS vs CT + LPS	13		0.398773
CT - LPS vs SF3A1 siRNA - LPS	146		4.47853
CT + LPS vs SF3A1 siRNA + LPS	159		4.8773
Skipped exons		14959
CT - LPS vs CT + LPS	38		0.254028
CT - LPS vs SF3A1 siRNA - LPS	280		1.87178
CT + LPS vs SF3A1 siRNA + LPS	282		1.88515
Alternate 3' splice site		6474
CT - LPS vs CT + LPS	15		0.231696
CT - LPS vs SF3A1 siRNA - LPS	75		1.15848
CT + LPS vs SF3A1 siRNA + LPS	88		1.35928
Alternate 5' splice site		3840
CT - LPS vs CT + LPS	13		0.338542
CT - LPS vs SF3A1 siRNA - LPS	39		1.01562
CT + LPS vs SF3A1 siRNA + LPS	36		0.9375
Mutually exclusive exon usage		1666
CT - LPS vs CT + LPS	6		0.360144
CT - LPS vs SF3A1 siRNA - LPS	27		1.62065
CT + LPS vs SF3A1 siRNA + LPS	25		1.5006
*Events with Bayes factors ≥1 (i.e. favoring the model that there is a difference in splicing between the two treatments) and going in same direction in all three reps
