# Supplementary material for: Regulation of Toll-like Receptor Signaling by the SF3a mRNA Splicing Complex
Source: PLoS Genet. 2015 Feb 6;11(2):e1004932. doi: 10.1371/journal.pgen.1004932 (PMC4450051; doi:10.1371/journal.pgen.1004932)
Supplement: S21 Table — Oligonucleotide sequences. (XLSX) [file pgen.1004932.s023.xlsx]

## Sheet: oligos
Table S21. Oligos used for qPCR
Gene	Left Primer	Right Primer
beta actin	CTGAACCCTAAGGCCAACCGTG	CCGTCTCCGGAGTCCATCACAATG
IL-6	CTTGGGACTGATGCTGGTGAC	GCCTCCGACTTGTGAAGTGGTATAGACAGG
MyD88-S	GGAGCTGAAGTCGCGCATCGGACAAAC	GTCTGTTCTAGTTGCCGGATCATCTCCTGCAC
MyD88-L	GTCTGTTCTAGTTGCCGGATCATCTCCTGCAC	CCACCCTTGATGACCCCCTAGGACAAAC
CD14 exon 1-intron 1	CTTTCAGAATCTACCGACCATGGTGAGTC	AGCAACAAGCCAAGCACACGCTCCTGAGGA
CD14 exon 1-exon 2	CAAACTTTCAGAATCTACCGACCATGGAGCG	ACTTTCCTCGTCTAGCTCGCAGGGCTCTGG
IRAK1 exon 1-intron 1	TGGAGCCCGCCGACTGGTGCCAGTTCGGTGGGTG	CAGCCGCAGCTCTGTCTGGTCGCGCACG
IRAK1 exon 1-exon 2	CCCGCCGACTGGTGCCAGTTCGCGGC	CTACGCGCGCGTTGCGGTTGATCCAGGGCC
IKK2 exon 15-intron 15	CTGTGGAGCAGTGTGGGCGGGTAGGAGAC	GGATAAGGGAGTGGAAGATGGTAGCGCC
IKK2 exon 15-exon 16	GGAGCAGGCTGTGGAGCAGTGTGGGCGGGAGAATG	CCCATCGGGCTCCTCTGCAGGTCCACAATG
IKK2 total	AGCTTACCTGAATCAGACAAGAAAAGTGAAGAAC	CTTCTGTCTTGCTCCTTCACAGTGTCCTGC
Rab7b	TTCTGGCCAGCCGGGCTCTGTTGAGGTACC	CGGGAGTCCGGAGGGAGGCCGAGATCAGC
TLR4	GCTTCTCCAATTTTTCAGAACTTCAGTGGCTGG	TGCCTTGTCTTCAATTGTTTCAATTTCACACCTGG
sTLR4	GCTTCTCCAATTTTTCAGAACTTCAGTGGCTGG	CCTTTGGAATTCTCCATCTATCATGCTC CTGG
SF3a1	GCAGCAGCAAGCTACGCAACAGCAGCTGCC	GCGATGAACTCAAACTCAGGAGGGGGCTCC
